# Supplementary material for: Positive deviance for promoting dual-method contraceptive use among women in Uganda: a cluster randomised controlled trial
Source: PubMed Central journal article supplement — BMJ Open. 2021 Aug 18;11(8):e046536. doi: 10.1136/bmjopen-2020-046536 (PMC8375745; doi:10.1136/bmjopen-2020-046536), 2021-08-18
Supplement: bmjopen-2020-046536.draft_revisions.pdf [file bmjopen-2020-046536.draft_revisions.pdf]

# BMJ Open

BMJ Open is committed to open peer review. As part of this commitment we make the peer review history of every article we publish publicly available.

When an article is published we post the peer reviewers' comments and the authors' responses online. We also post the versions of the paper that were used during peer review. These are the versions that the peer review comments apply to.

The versions of the paper that follow are the versions that were submitted during the peer review process. They are not the versions of record or the final published versions. They should not be cited or distributed as the published version of this manuscript.

BMJ Open is an open access journal and the full, final, typeset and author-corrected version of record of the manuscript is available on our site with no access controls, subscription charges or pay-per-view fees (<http://bmjopen.bmj.com>).

If you have any questions on BMJ Open's open peer review process please email [info.bmjopen@bmj.com](mailto:info.bmjopen@bmj.com)

# BMJ Open

## Positive deviance for promoting dual-method contraceptive use among women in Uganda: A cluster randomized controlled trial

|                               |                                                                                                                                                                                                                                                                                                                                                                                                                                                                                                                                                                                                                                                                                                                                               |
|-------------------------------|-----------------------------------------------------------------------------------------------------------------------------------------------------------------------------------------------------------------------------------------------------------------------------------------------------------------------------------------------------------------------------------------------------------------------------------------------------------------------------------------------------------------------------------------------------------------------------------------------------------------------------------------------------------------------------------------------------------------------------------------------|
| Journal:                      | <i>BMJ Open</i>                                                                                                                                                                                                                                                                                                                                                                                                                                                                                                                                                                                                                                                                                                                               |
| Manuscript ID                 | bmjopen-2020-046536                                                                                                                                                                                                                                                                                                                                                                                                                                                                                                                                                                                                                                                                                                                           |
| Article Type:                 | Original research                                                                                                                                                                                                                                                                                                                                                                                                                                                                                                                                                                                                                                                                                                                             |
| Date Submitted by the Author: | 02-Nov-2020                                                                                                                                                                                                                                                                                                                                                                                                                                                                                                                                                                                                                                                                                                                                   |
| Complete List of Authors:     | Kosugi, Hodaka; The University of Tokyo, Department of Community and Global Health, Graduate School of Medicine<br>Shibanuma, Akira; The University of Tokyo, Department of Community and Global Health, Graduate School of Medicine<br>Kiriya, Junko; The University of Tokyo, Department of Community and Global Health, Graduate School of Medicine<br>Ong, Ken; The University of Tokyo, Department of Community and Global Health, Graduate School of Medicine<br>Mucunguzi, Stephen; UNICEF Uganda Country Office<br>Muzoora, Conrad; Mbarara University of Science and Technology, Department of Internal Medicine<br>Jimba, Masamine; The University of Tokyo, Department of Community and Global Health, Graduate School of Medicine |
| Keywords:                     | Public health < INFECTIOUS DISEASES, HIV & AIDS < INFECTIOUS DISEASES, Epidemiology < INFECTIOUS DISEASES                                                                                                                                                                                                                                                                                                                                                                                                                                                                                                                                                                                                                                     |
|                               |                                                                                                                                                                                                                                                                                                                                                                                                                                                                                                                                                                                                                                                                                                                                               |

SCHOLARONE™  
Manuscripts

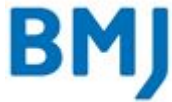

I, the Submitting Author has the right to grant and does grant on behalf of all authors of the Work (as defined in the below author licence), an exclusive licence and/or a non-exclusive licence for contributions from authors who are: i) UK Crown employees; ii) where BMJ has agreed a CC-BY licence shall apply, and/or iii) in accordance with the terms applicable for US Federal Government officers or employees acting as part of their official duties; on a worldwide, perpetual, irrevocable, royalty-free basis to BMJ Publishing Group Ltd ("BMJ") its licensees and where the relevant Journal is co-owned by BMJ to the co-owners of the Journal, to publish the Work in this journal and any other BMJ products and to exploit all rights, as set out in our [licence](#).

The Submitting Author accepts and understands that any supply made under these terms is made by BMJ to the Submitting Author unless you are acting as an employee on behalf of your employer or a postgraduate student of an affiliated institution which is paying any applicable article publishing charge ("APC") for Open Access articles. Where the Submitting Author wishes to make the Work available on an Open Access basis (and intends to pay the relevant APC), the terms of reuse of such Open Access shall be governed by a Creative Commons licence – details of these licences and which [Creative Commons](#) licence will apply to this Work are set out in our licence referred to above.

Other than as permitted in any relevant BMJ Author's Self Archiving Policies, I confirm this Work has not been accepted for publication elsewhere, is not being considered for publication elsewhere and does not duplicate material already published. I confirm all authors consent to publication of this Work and authorise the granting of this licence.

1  
2  
3 1 **Title:** Positive deviance for promoting dual-method contraceptive use among women in  
4  
5 2 Uganda: A cluster randomized controlled trial  
6  
7  
8

9 3  
10  
11 4 **Authors:** Hodaka Kosugi <sup>1</sup>, Akira Shibamura <sup>1</sup>, Junko Kiriya <sup>1</sup>, Ken Ing Cherng Ong <sup>1</sup>,  
12  
13 5 Stephen Mucunguzi <sup>2</sup>, Conrad Muzoora <sup>3</sup> and Masamine Jimba <sup>1,\*</sup>  
14  
15  
16 6

17  
18  
19 7 **Author Affiliations:**

20  
21  
22 8 <sup>1</sup> Department of Community and Global Health, Graduate School of Medicine, The  
23  
24 9 University of Tokyo, Tokyo, Japan

25  
26  
27 10 <sup>2</sup> UNICEF Uganda Country Office, Kampala, Uganda

28  
29  
30 11 <sup>3</sup> Department of Internal Medicine, Mbarara University of Science and Technology,  
31  
32 12 Mbarara, Uganda  
33  
34  
35 13

36  
37  
38 14 **Corresponding Author:**

39  
40  
41 15 Professor Masamine Jimba; Department of Community and Global Health, Graduate School  
42  
43 16 of Medicine, The University of Tokyo, 7-3-1 Hongo, Bunkyo-ku, Tokyo 113-0033, Japan;  
44  
45 17 Tel.: +81-3-5841-3698; Email: [mjimba@m.u-tokyo.ac.jp](mailto:mjimba@m.u-tokyo.ac.jp).  
46  
47  
48 18

49  
50  
51 19 Word count (main text): 4,294  
52  
53  
54  
55  
56  
57  
58  
59  
60

1  
2  
3 **20 Abstract**  
4  
5

6 **21 Objectives** To examine the effects of a positive deviance intervention on dual-method  
7  
8  
9 **22** contraceptive use among married or in-union women.  
10

11 **23 Design** Open-label cluster randomized controlled trial.  
12  
13

14 **24 Setting** 20 health facilities in Mbarara District, Uganda.  
15  
16

17 **25 Participants** 960 married or in-union women aged 18–49 years who used highly effective  
18  
19  
20 **26** contraceptives. Among them, 734 (76.5%), 787 (82.0%), 779 (81.2%), and 790 (82.3%)  
21  
22 **27** completed the two-, four-, six-, and eight-month follow-up surveys, respectively.  
23  
24

25 **28 Interventions** A combination of clinic- and telephone-based counseling and a one-day  
26  
27 **29** participatory workshop, which were developed based on a preliminary qualitative study of  
28  
29  
30 **30** women practicing dual-method contraception in the study area.  
31

32 **31 Primary and secondary outcome measures** The primary outcome was dual-method  
33  
34 **32** contraceptive use which was measured in two timeframes: dual-method contraceptive use at  
35  
36  
37 **33** the last sexual intercourse and its consistent use in the two months prior to each follow-up.  
38  
39 **34** The secondary outcomes were communication with partners about HIV/STI risk and  
40  
41 **35** pregnancy incidence.  
42  
43

44 **36 Results** More women in the intervention group used dual-method contraception at the last  
45  
46  
47 **37** sexual intercourse at two months (AOR = 4.29; 95% CI 2.12–8.69) and eight months  
48  
49 **38** (AOR = 2.19; 95% CI 1.07–4.48) than in the control group. Moreover, consistent dual-  
50  
51 **39** method contraceptive use was more prevalent in the intervention group than in the control  
52  
53  
54 **40** group at two months (AOR = 13.71; 95% CI 3.59–52.43), and the intervention effect lasted  
55  
56 **41** throughout the follow-up period.  
57  
58  
59  
60

1  
2  
3 42 **Conclusions** The positive deviance intervention increased dual-method contraceptive use  
4  
5 43 among women in Mbarara District, Uganda, and could be effective at reducing the dual risk  
6  
7 44 of unintended pregnancies and HIV infections.  
8  
9

10 45 **Trial registration** UMIN-CTR Clinical Trial, UMIN000037065.  
11  
12

13  
14 46 Word count (abstract): 264  
15  
16  
17  
18  
19  
20  
21  
22  
23  
24  
25  
26  
27  
28  
29  
30  
31  
32  
33  
34  
35  
36  
37  
38  
39  
40  
41  
42  
43  
44  
45  
46  
47  
48  
49  
50  
51  
52  
53  
54  
55  
56  
57  
58  
59  
60

For peer review only

## 47 **Strengths and limitations of this study**

- 48 • The outcomes were measured based on participants' self-reports and therefore subject  
49 to measurement errors.
- 50 • Due to the small number of clusters, several characteristics of the participants were  
51 not balanced between the intervention and control groups.
- 52 • However, mixed-effects logistic regression analysis was performed by controlling the  
53 cluster effects and the differences in baseline characteristics to evaluate the  
54 intervention's effects.
- 55 • This intervention was developed using the positive deviance approach which aims to  
56 promote behaviors of individuals who have achieved rare success to other community  
57 members.
- 58 • Women who used dual-method contraception in the study area contributed the  
59 intervention's development and implementation as peer counselors.

60 Word count (Strengths and limitations of this study): 107

## 62 **Introduction**

63 Unintended pregnancy and human immunodeficiency virus (HIV) infection remain major  
64 public health concerns in sub-Saharan Africa (SSA). In SSA, almost 30% of pregnancies  
65 were unintended, whereas women accounted for 59% of an estimated 980,000 new HIV  
66 infections that occurred among adults in 2018.<sup>1,2</sup> Sexual intercourse is a major route of HIV  
67 transmission, and a significant gender disparity in HIV infection begins when women reach

1  
2  
3 68 reproductive age.<sup>3</sup> In SSA, therefore, women of reproductive age bear the dual burden of  
4  
5 69 unintended pregnancies and HIV.  
6  
7

8  
9 70 Dual-method contraceptive use has been proposed as an effective strategy for preventing  
10  
11 71 unintended pregnancies and sexually transmitted infections (STIs), including HIV.<sup>4</sup> It is  
12  
13 72 defined as the use of a highly effective contraceptive (HEC) (e.g., injectables, implants, and  
14  
15 73 oral contraceptive pills, intrauterine devices, and sterilization) in combination with a barrier  
16  
17 74 method, such as male or female condoms.<sup>4</sup> Despite the high incidence rate of HIV, it is not  
18  
19 75 commonly practiced in SSA, especially among women in long-term relationships.<sup>4,5</sup> For  
20  
21 76 instance, only 3.8% of married women in Zimbabwe used dual-method contraception with  
22  
23 77 their partners.<sup>5</sup> Furthermore, women in stable relationships tend to prioritize HECs over  
24  
25 78 condoms and are less likely to use condoms with HECs.<sup>6-8</sup> Although the majority of women  
26  
27 79 understand that condom use is critical for preventing HIV/STIs, they do not practice it.<sup>9</sup>  
28  
29 80 Marital sexual intercourse, therefore, becomes one of the major routes of HIV infection  
30  
31 81 because of inconsistent or no condom use in SSA.<sup>10</sup>  
32  
33  
34  
35  
36  
37  
38

39 82 Several studies examined interventions for promoting dual-method contraceptive use.<sup>4</sup>  
40  
41 83 However, few showed a significant effect on the dual-method use, and their impact was often  
42  
43 84 unsustainable.<sup>11</sup> To our knowledge, the only intervention that demonstrated a continued effect  
44  
45 85 on the dual-method use over six months was a combination of case management and peer  
46  
47 86 leadership programs among adolescents in the United States of America (USA).<sup>12</sup> In SSA,  
48  
49 87 conditional lottery incentives increased dual-method use among South African women at  
50  
51 88 three months but not at six months after the intervention.<sup>13</sup> Effectiveness of behavioral change  
52  
53 89 interventions on the dual-method use among married or in-union women remains lacking.  
54  
55  
56  
57  
58  
59  
60



1  
2  
3 90 The positive deviance approach is based on the premise that there are community members  
4  
5 91 who solve problems while many of their peers do not.<sup>14</sup> This approach seeks unique behaviors  
6  
7 92 of such exceptional people (positive deviants or PDs) and disseminates these behaviors to the  
8  
9 93 whole community through community-led and peer-based interventions.<sup>14,15</sup> We previously  
10  
11 94 conducted a qualitative study to examine the unique behaviors of PDs (i.e., women using  
12  
13 95 dual-method with marital or in-union partners) in Mbarara District, Uganda.<sup>16</sup> These PDs  
14  
15 96 successfully practiced dual-method contraception by initiating discussions, educating their  
16  
17 97 partners on sexual risks and condom use, and obtaining condoms.<sup>16</sup> In this study, we  
18  
19 98 examined the effectiveness of an intervention developed based on those findings to promote  
20  
21 99 dual-method contraceptive use among women in the same area.  
22  
23  
24  
25  
26  
27  
28 100  
29  
30  
31  
32

## 31 101 **Methods**

### 35 102 **Study design and settings**

38 103 A cluster randomized controlled trial was conducted for eight months (November 2019 to  
39  
40 104 July 2020) in Mbarara District in Southwestern Uganda. The protocol of the trial has been  
41  
42 105 previously published.<sup>17</sup> The prevalence of HIV is geographically diverse in Uganda, and the  
43  
44 106 Southwestern region has one of the highest prevalence rates of HIV at 7.9% among adults.  
45  
46 107 This rate is higher among women (9.3%) than men (6.3%).<sup>18</sup> An estimated 32% and 2% of  
47  
48 108 married or in-union women use HECs and condoms, respectively.<sup>19</sup> All public health  
49  
50 109 facilities provide HECs and male condoms free of charge. Male condoms are also available  
51  
52 110 for purchase at pharmacies and markets for 0.15 to 0.50 United States dollars (USD).<sup>16</sup>  
53  
54  
55  
56  
57

### 58 111 **Study participants and enrollment**

1  
2  
3 112 Twenty public health facilities were selected out of 48 in Mbarara District. To recruit a  
4  
5 113 sufficient number of participants, all health facilities at the sub-county level or above were  
6  
7 114 selected followed by health facilities at the parish level, which had a high number of  
8  
9 115 outpatients. These facilities included one general hospital, three county-level health centers,  
10  
11 116 11 sub-county-level health centers, and five parish-level health centers. Among them, seven  
12  
13 117 facilities were located in urban areas.<sup>20</sup>  
14  
15  
16  
17

18 118 The inclusion criteria were women (i) aged 18 to 49 years, (ii) having had sexual intercourse  
19  
20 119 in the last three months, (iii) using HECs, and who (iv) desire to avoid pregnancy for 12  
21  
22 120 months from recruitment, (v) have a husband or live-in sexual partner, and (vi) have access to  
23  
24 121 a valid phone number. The exclusion criteria were women who were (i) pregnant, (ii) infertile  
25  
26 122 for other reasons, and (iii) had been using condoms consistently with an HEC in the last two  
27  
28 123 months before the recruitment. The sample size of 960 was calculated based on the effect size  
29  
30 124 of 2.43 reported in a dual-method intervention trial in the USA, considering an intraclass  
31  
32 125 correlation coefficient of 0.006 and a 26% dropout rate.<sup>11,12,21</sup> The power of the study was set  
33  
34 126 at 80%, and the significance level was set at 5%.  
35  
36  
37  
38  
39

40 127 Female research assistants recruited women who visited the family planning sections of the  
41  
42 128 selected health facilities. They approached every third woman after selecting the first woman  
43  
44 129 purposively to inform the opportunity to participate in the study. If a woman was interested,  
45  
46 130 they confirmed HEC use with her family planning client record card and asked questions to  
47  
48 131 verify eligibility. The process was repeated until the required sample size was reached.  
49  
50  
51

### 52 132 **Randomization and masking**

53  
54  
55

56 133 The 20 health facilities were stratified based on their level and urban or rural status. They  
57  
58 134 were then randomized to either intervention or control group with a 1:1 allocation ratio. An  
59  
60

1  
2  
3 135 independent researcher who was not involved in the data collection or analysis carried out the  
4  
5 136 allocation using computer-generated random sequences. Blinding was not feasible in this  
6  
7  
8 137 study. However, the research assistants who performed the outcome assessment were blinded  
9  
10 138 to the intervention allocation.

### 13 139 **Intervention**

14  
15  
16  
17 140 The intervention was developed based on the results of the preliminary study of nine PDs  
18  
19 141 conducted in Mbarara District, Uganda in October 2019.<sup>16</sup> The PDs were identified by  
20  
21 142 screening 150 women using HECs at five health facilities. Then, in-depth interviews were  
22  
23 143 conducted with the PDs. Thematic analysis was performed using the positive deviance  
24  
25 144 framework to identify the unique behaviors associated with dual-method contraceptive use.  
26  
27 145 The findings of the study have been published.<sup>16</sup>

28  
29  
30  
31  
32 146 Out of the nine PDs, four joined the intervention as peer counselors, whereas the other five  
33  
34 147 were unable to participate due to other commitments. The four PDs demonstrated dual-  
35  
36 148 method contraceptive use at least two months before the screening. The mean age of the four  
37  
38 149 PDs was 29.8 years (standard deviation [SD] 6.0 years). The researchers (HK and SM)  
39  
40 150 initially developed the intervention based on the preliminary findings. The PDs were then  
41  
42 151 invited to four meetings. In the first meeting, female research assistants explained the positive  
43  
44 152 deviance approach and facilitated a discussion among the PDs to share their experience on  
45  
46 153 how they started dual-method contraceptive use. In the following meetings with the PDs, they  
47  
48 154 facilitated discussions on how to promote dual-method contraceptive use and necessary  
49  
50 155 improvements to the intervention. Several recommendations from the PDs were incorporated  
51  
52 156 into the intervention, such as providing a handout to enable women to share topics learned  
53  
54 157 with their partners and effective communication skills, which were practiced through role-  
55  
56 158 play.

1  
2  
3 159 Table 1 summarizes the intervention, which combined clinic- and phone-based counseling  
4  
5 160 and a participatory workshop, to disseminate the unique practices of the PDs.<sup>16</sup> After the  
6  
7 161 baseline interview on the day of enrollment, women received counseling focusing on dual-  
8  
9 162 method contraception in addition to regular family planning counseling. Trained research  
10  
11 163 assistants delivered the counseling for about 20 to 30 minutes. Women received the handout  
12  
13 164 used during the counseling developed either in English or Runyankore and were encouraged  
14  
15 165 to initiate discussions on dual-method contraceptive use with their partners. The handout  
16  
17 166 included several quotes from the PDs.

18  
19  
20  
21  
22  
23 167 After two weeks of enrollment, women were invited for a one-day participatory learning  
24  
25 168 workshop at the same health facility where they were recruited. Participation in the workshop  
26  
27 169 was voluntary. The four PDs facilitated the workshop with support from the research  
28  
29 170 assistants. It included role-play exercises to enable women to acquire successful  
30  
31 171 communication skills for discussions with their partners, practice of male condom use, and  
32  
33 172 group discussions about the dual risk of unintended pregnancies and HIV/STIs from their  
34  
35 173 partners.

36  
37  
38  
39  
40 174 In addition, women in the intervention group received a bimonthly telephone counseling call  
41  
42 175 from the PDs three times (i.e., three, five, and seven months after enrollment). It aimed to  
43  
44 176 confirm women's dual-method status and challenges, provide reminders regarding the risk of  
45  
46 177 unintended pregnancies and HIV/STIs, and strengthen their capacity to communicate with  
47  
48 178 their partners. In addition, the call included brief health education messages on family  
49  
50 179 planning and HIV/STI based on an existing tool.<sup>22</sup> Each PD provided the same women with  
51  
52 180 counseling each time to build rapport and ensure effective counseling. Each counseling lasted  
53  
54 181 for 15 to 30 minutes. The PDs kept written counseling records and held a group meeting after  
55  
56  
57  
58  
59  
60

1  
2  
3 182 each counseling period to reflect on the women's problems and advice given. The research  
4  
5 183 assistants facilitated those meetings and answered questions from the PDs.  
6  
7  
8  
9 184 Women in the control group received family planning counseling, including dual-method  
10  
11 185 contraceptive use, from female research assistants for 10 to 20 minutes, using the existing  
12  
13 186 tool on the day of enrollment.<sup>22</sup> However, this group of women did not receive the handout.  
14  
15  
16 187 Furthermore, the research assistants provided bimonthly health education three times (i.e.,  
17  
18 188 three, five, and seven months after enrollment) by phone. The topics were the same as those  
19  
20 189 for the intervention group. Each call lasted for about ten minutes.  
21  
22  
23  
24 190 Condoms were provided for free, regardless of the allocation at the selected health facilities.  
25  
26 191 Before providing the intervention, the research assistants received a two-day training on the  
27  
28 192 contents of the existing counseling tool. In addition, the four PDs received a one-day training  
29  
30 193 on counseling and ethics, including the confidentiality of their clients. The PDs joined the  
31  
32 194 intervention as volunteers but received 30,000 Ugandan Shillings (UGX) (equivalent to 9  
33  
34 195 USD) per day when they engaged in the workshop and the counseling to compensate for their  
35  
36 196 time and transportation.  
37  
38  
39  
40

41 197 <Insert Table 1 here>  
42  
43  
44

## 45 198 **Outcomes**

46  
47  
48 199 The primary outcome was dual-method contraceptive use, which was defined as the  
49  
50 200 application of a male or female condom along with an HEC, such as injectables, implants,  
51  
52 201 intrauterine devices, pills, and female sterilization.<sup>4</sup> It was measured in two timeframes: dual-  
53  
54 202 method contraceptive use at the last sexual intercourse and its consistent use in the last two  
55  
56 203 months before each follow-up. The former is easier for women to answer accurately than the  
57  
58 204 latter, which requires to estimate the frequency of condom use in the past.<sup>23</sup> Nevertheless,  
59  
60

1  
2  
3 205 consistent dual-method contraceptive use is critical, given that condoms are often used  
4  
5 206 inconsistently.<sup>23</sup> Two questions regarding HEC use and the frequency of condom use were  
6  
7 207 combined to measure consistent dual-method contraceptive use. The following question was  
8  
9 208 posed for HEC use: “Apart from condoms, have you been using any other forms of protection  
10  
11 209 against pregnancy during the past two months?” The frequency of condom use was asked  
12  
13 210 with an item: “How often did you and your partner use a male or female condom during the  
14  
15 211 past two months?” Women answered this question using a four-point scale “every time,”  
16  
17 212 “almost every time,” “sometimes,” and “never.” Women using an HEC and a condom every  
18  
19 213 time were considered practicing consistent dual-method contraceptive use.

20  
21  
22  
23  
24  
25 214 The secondary outcome was communication about HIV/STI risk with partners in the last two  
26  
27 215 months prior to each follow-up. This outcome was assessed using the following item: “Have  
28  
29 216 you ever discussed HIV/STI risk with your husband/live-in sexual partner in the past two  
30  
31 217 months?” Another secondary outcome was the self-reported incidence of pregnancy in the  
32  
33 218 two months before each follow-up regardless of whether the pregnancy was intended or not.  
34  
35 219 This outcome was assessed using the following questions: “Have you been told by a  
36  
37 220 healthcare provider that you got pregnant for the first time in the past two months?”

38  
39  
40  
41  
42 221 In addition, the following information was collected at baseline: age, education, religion,  
43  
44 222 employment, wealth index based on the availability of 18 household assets, number of  
45  
46 223 children, respondent’s and partner’s pregnancy intention, history of unintended pregnancy,  
47  
48 224 multiple sex partnership, type of HECs in use, respondent’s and partner’s HIV status, risk  
49  
50 225 perception of HIV/STIs, HIV-related knowledge (HIV-KQ-18),<sup>24</sup> condom use self-efficacy,<sup>25</sup>  
51  
52 226 and sexual relationship control power (the Sexual Relationship Power Scale).<sup>26</sup> Several  
53  
54 227 changes were made to the outcomes after the trial commenced. An outcome for STI incidence  
55  
56 228 was omitted because we found that the reliability of self-reported STI incidence could be low  
57  
58  
59  
60

1  
2  
3 229 among the participants during the data collection. Instead, the more measurable outcome of  
4  
5 230 HIV/STI risk communication was added as a possible predictor of dual-method contraceptive  
6  
7  
8 231 use.  
9

## 10 11 232 **Data collection**

12  
13  
14 233 All research assistants received a two-day training on data collection and ethics before the  
15  
16 234 baseline data collection. After enrollment, the research assistants interviewed women to  
17  
18 235 identify their baseline characteristics using a pre-tested structured questionnaire. Each  
19  
20 236 interview lasted approximately 30 to 45 minutes.  
21  
22  
23

24  
25 237 For outcome assessment, three female research assistants carried out follow-up phone calls  
26  
27 238 bimonthly for eight months to assess the influence of the intervention on the primary and  
28  
29 239 secondary outcomes (i.e., two, four, six, and eight months after enrollment). The participants  
30  
31 240 received a text message reminding them to answer the next call or call back if they missed the  
32  
33 241 first call. The assistants called each participant up to five times during each follow-up until  
34  
35 242 they answered. The participants received incentives worth 20,000 UGX (equivalent to 6  
36  
37 243 USD) for their time after the baseline interview.  
38  
39  
40

## 41 42 244 **Data analysis**

43  
44  
45 245 Chi-squared tests and independent sample t-tests were performed to compare the general  
46  
47 246 characteristics between the intervention and control groups at baseline and follow-up. Mixed-  
48  
49 247 effects logistic regression analysis was performed to assess the effects of the intervention on  
50  
51 248 the primary and secondary outcomes. Unadjusted odds ratios (ORs) were first estimated by  
52  
53 249 comparing between the control and intervention groups (Model 1). Then, in the main model  
54  
55 250 (Model 2), the intervention effects were presented with adjusted odds ratios (AORs) for the  
56  
57 251 interaction term (group  $\times$  time) after controlling for cluster effects for all health facilities and  
58  
59  
60

1  
2  
3 252 the individuals. The AORs can be interpreted as the difference between the intervention and  
4  
5 253 control groups in the outcome measures between baseline and each follow-up point. In the  
6  
7 254 full model (Model 3), sociodemographic characteristics at baseline were controlled for in  
8  
9 255 addition to the variables included in Model 2. For sensitivity analyses, attrition rates and  
10  
11 256 reasons for dropout were compared between the intervention and control groups using  
12  
13 257 Pearson's chi-squared test. Moreover, differences in baseline characteristics were compared  
14  
15 258 between women lost to follow-up and those who were reached. Analyses were conducted on  
16  
17 259 an intention-to-treat basis. Significance level was set at 5%. STATA version 14 was used for  
18  
19 260 data analyses.  
20  
21  
22  
23  
24

## 25 261 **Ethics**

26  
27  
28 262 Participation in this study was voluntary, and the participants provided written informed  
29  
30 263 consent. The protocol was registered at UMIN-CTR Clinical Trial under identifier number  
31  
32 264 UMIN000037065. The Consolidated Standards of Reporting Trials (CONSORT) checklist is  
33  
34 265 available as Supplementary Table S1.  
35  
36  
37  
38

## 39 266 **Patient and public involvement**

40  
41  
42 267 The nine PDs were identified from the public, and four of them were involved in the design  
43  
44 268 and conduct of the intervention as peer counselors. Moreover, the female research assistants  
45  
46 269 were recruited from the study area and contributed to the intervention's development and  
47  
48 270 implementation. The findings of this study have been shared with them and Mbarara District  
49  
50 271 health authority.  
51  
52  
53  
54

55 272

## 58 273 **Results**



## 274 **Participant characteristics**

275 Out of 1,956 women screened, 960 were eligible for the trial and allocated to the intervention  
276 or control group (Figure 1). Of 480 women in the intervention group, 345 (71.9%) attended  
277 the one-day workshop. Moreover, 385 (80.2%), 361 (75.2%), and 369 (76.9%) received  
278 counseling at three, five, and eight months after enrollment, respectively. The response rate to  
279 follow-up surveys ranged from 76.5% at two months to 82.3% at eight months. Women in  
280 the intervention group were more likely to respond at two months (79.8% vs. 73.1%,  $p =$   
281 0.015) and four months (84.6% vs. 79.4%,  $p = 0.036$ ). The baseline characteristics were  
282 compared between women followed up and those lost to follow-up in each group.  
283 Supplementary Table 2 presents the results of the sensitivity analysis.

284 <Insert Figure 1 here>

285 Table 2 presents the sociodemographic characteristics of 960 women at baseline. The mean  
286 age was 30.1 (SD 6.7) years. The mean number of children was three (SD 1.8). Of 960 women,  
287 more than 70% completed primary education. Of all, 9% were HIV-positive, 7.6% had an HIV-  
288 positive partner, and 84.5% perceived a certain level of risk for HIV/STIs. Injectables were the  
289 most common family planning method, used by more than half of women (51.9%), followed  
290 by implants (31.6%). Characteristics were similar for the intervention and control groups with  
291 a few slight imbalances. Specifically, women in the control group were more likely to have  
292 primary or higher education (75.6% vs. 69.8%;  $p = 0.042$ ), be categorized into the rich quintile  
293 (37.7% vs. 28.3%;  $p = 0.008$ ), and have fewer children (mean: 2.9 vs. 3.2;  $p = 0.041$ ) and less  
294 HIV-related knowledge (mean: 11.3 vs. 11.9;  $p < 0.001$ ).

295 <Insert Table 2 here>

## 296 **Effect of the intervention**

1  
2  
3 297 Table 3 demonstrates the outcome data by intervention group and time. More women in the  
4  
5 298 intervention than in the control group used dual-method contraception at the last sexual  
6  
7 299 intercourse and consistently at each follow-up point. These differences were largest at two  
8  
9 300 months (dual-method contraceptive use at last sexual intercourse: 42.6% vs. 13.8%;  
10  
11 301  $p < 0.001$ ; consistent dual-method contraceptive use: 15.5% vs. 1.5%;  $p < 0.001$ ). The  
12  
13 302 proportion of women practicing dual-method contraception in both time frames gradually  
14  
15 303 decreased over time. More women discussed HIV/STI risk with their partners in the  
16  
17 304 intervention than in the control group at each follow-up. The difference was also largest at  
18  
19 305 the first follow-up (83.5% vs. 64.9%;  $p < 0.001$ ). However, pregnancy incidence was not  
20  
21 306 significantly different between the groups. Throughout the data collection period, 6 and 15  
22  
23 307 women became pregnant in the intervention and control groups, respectively. Notably, the  
24  
25 308 result of the chi-squared test of the accumulated cases of pregnancies in eight months  
26  
27 309 illustrated a significantly lower pregnancy incidence in the intervention group ( $p = 0.047$ ).  
28  
29  
30  
31  
32  
33

34 310 <Insert Table 3 here>  
35  
36  
37

38 311 Table 4 illustrates the effects of the intervention on primary and secondary outcomes among  
39  
40 312 women at two, four, six, and eight months after enrollment. In Model 2, more women in the  
41  
42 313 intervention group reported dual-method contraceptive use at the last sexual intercourse than  
43  
44 314 in the control group at two months (AOR = 4.29; 95% CI 2.12–8.69,  $p < 0.001$ ). The  
45  
46 315 intervention group also reported more dual-method contraceptive use at the last sexual  
47  
48 316 intercourse at four, six, and eight months, although the difference was statistically significant  
49  
50 317 only at eight months. Moreover, more women in the intervention group practiced consistent  
51  
52 318 dual-method contraceptive use than in the control group at two months (AOR = 13.71; 95%  
53  
54 319 CI 3.59–52.43,  $p < 0.001$ ). The intervention effect remained statistically significant at four,  
55  
56 320 six, and eight months. Moreover, more women in the intervention group reported  
57  
58  
59  
60

1  
2  
3 321 communication with their partners regarding HIV/STI risk at two months (AOR = 2.70; 95%  
4  
5 322 CI: 1.72–4.23,  $p < 0.001$ ). The effect of intervention lasted throughout the follow-up period.  
6  
7 323 However, pregnancy incidence was not significantly different between the groups throughout  
8  
9 324 the follow-up period. The full model (Model 3) demonstrated similar effects estimates to  
10  
11 325 those reported in the main model. The complete results are provided in Supplementary Tables  
12  
13 326 S3-S17.

14  
15  
16  
17  
18 327 <Insert Table 4 here>  
19  
20  
21  
22 328

## 23 24 329 **Discussion**

25  
26  
27  
28 330 The positive deviance intervention was effective in promoting dual-method contraceptive use  
29  
30 331 and communication about HIV/STI risk among women in long-term relationships in Mbarara  
31  
32 332 District, Uganda, who used highly effective contraceptives. However, we observed no  
33  
34 333 significant difference in the incidence of pregnancy between the intervention and control  
35  
36 334 groups.

37  
38  
39  
40 335 The positive deviance intervention increased the uptake and continued use of dual-method  
41  
42 336 contraception among women. The study observed the largest difference in the dual-method use  
43  
44 337 between the intervention and control groups at the two-month assessment, which was the  
45  
46 338 closest time point to the baseline counseling and workshop. In the intervention group, 43% and  
47  
48 339 16% of women reported the dual-method use at the last sexual intercourse and its consistent  
49  
50 340 use, respectively. The number of women using dual-method contraception decreased in the  
51  
52 341 intervention and control groups over time, as observed in previous studies.<sup>11</sup> However, the  
53  
54 342 significant difference between the groups remained during the follow-up period.  
55  
56  
57  
58  
59  
60

1  
2  
3 343 The observed effect was consistent with a previous intervention study that combined case  
4  
5 344 management and peer education program for adolescent girls in the USA. The intervention  
6  
7 345 illustrated continued effects on the dual-method use at 12 and 24 months after enrollment.<sup>12</sup>  
8  
9  
10 346 The peer leadership program aimed to foster prosocial interaction skills and supportive peer  
11  
12 347 relationships among teenagers. The peer supporters were not PDs and provided with intensive  
13  
14 348 standard training. Effective communication with partners on sexual health was one of the key  
15  
16 349 topics covered in the sessions.<sup>12</sup> Similar to this, the current intervention provided bimonthly  
17  
18 350 counseling tailored to the participants' individual needs. However, it was provided by the PDs  
19  
20 351 who had overcome barriers to dual-method contraceptive use. Counseling by PDs may be an  
21  
22 352 alternative strategy because it ensures adequate attention to the diverse issues confronting  
23  
24 353 women and prosocial peer influence on their behaviors.

25  
26  
27  
28  
29 354 Few intervention studies have demonstrated an increase in dual-method contraceptive use,<sup>12,13</sup>  
30  
31 355 and adherence to such practice was frequently low.<sup>11</sup> Condom use is often considered a male  
32  
33 356 responsibility<sup>27</sup> and unacceptable in long-term relationships in SSA, especially when women  
34  
35 357 use another contraceptive method.<sup>8,10</sup> The positive deviance intervention can be effective in  
36  
37 358 changing such norms. The PDs who overcame the barriers to dual-method contraceptive use  
38  
39 359 shared their experiences to help other women realize that condom use is normal even among  
40  
41 360 marital or in-union relationships. In addition, the intervention enabled women to negotiate  
42  
43 361 condom use with their partners. The positive deviance intervention could empower women  
44  
45 362 with the skills necessary to play a proactive role in negotiation and condom use with their  
46  
47 363 partners.

48  
49 364 The intervention also increased communication about HIV/STI risk between the women and  
50  
51 365 their partners. Although more than half of the women had not discussed such risk at baseline,  
52  
53 366 four out of five women in the intervention group discussed HIV/STI risk at two months. The  
54  
55  
56  
57  
58  
59  
60

1  
2  
3 367 intervention group was more likely to have such communication than the control group  
4  
5 368 throughout the eight-month follow-up period. The increase in dual-method contraceptive use  
6  
7 369 could have been underpinned by frequent communication with partners on HIV/STI risk.<sup>28</sup>  
8  
9  
10 370 Failure to practice dual-method contraception was not often due to women's inability, but  
11  
12 371 their partner's unwillingness to use condoms.<sup>11</sup> Therefore, Peipert et al. underscored the  
13  
14 372 importance of education for male partners for promoting dual-method contraception.<sup>11</sup>  
15  
16  
17 373 However, reaching out to male partners may be more difficult compared to providing  
18  
19 374 education to women visiting family planning clinics. During the intervention, women  
20  
21 375 received the handout used in the initial counseling and were encouraged to discuss HIV/STI  
22  
23 376 risk with their partners. A qualitative study found that women were more likely to initiate  
24  
25 377 discussion and persuade their male partners to use condoms in Uganda.<sup>29</sup> The majority of  
26  
27 378 women in this study were willing to discuss such risk with their partners. Considering that  
28  
29 379 women who use HECs visit health facilities presumably more often than men do, educating  
30  
31 380 them on dual-method contraception and encouraging them to share messages with their  
32  
33 381 partners can be an effective strategy.  
34  
35  
36  
37  
38  
39 382 Despite the increase in dual-method contraceptive use, no significant difference was observed  
40  
41 383 in pregnancy occurrence between the intervention and control groups at each follow-up point.  
42  
43 384 In this study, many women started the dual-method use but practiced it inconsistently.  
44  
45 385 Inconsistent dual-method contraceptive use may explain the lack of effect on avoiding  
46  
47 386 pregnancies.<sup>30</sup> It might also be explained by a lack of statistical power. Only 21 women  
48  
49 387 (about 2% of the participants) became pregnant during the eight-month follow-up. The low  
50  
51 388 incidence of pregnancy is reasonable because we recruited women using an HEC and who  
52  
53 389 wanted to avoid pregnancy at baseline. However, the intervention group showed the lower  
54  
55 390 incidence of pregnancy over time. Thus, a further trial with a larger sample size is  
56  
57 391 recommended to examine the effect of the intervention on the incidence of pregnancy.  
58  
59  
60

1  
2  
3 392 The study has several limitations. First, the study measured outcomes based on self-reports  
4  
5 393 from the participants. Therefore, it is subject to measurement errors. Especially, dual-method  
6  
7 394 contraceptive use could have been over-reported given the information provided to  
8  
9 395 participants during the intervention. Women in the intervention group had longer contacts  
10  
11 396 with the PDs, including the five-hour workshop, whereas those in the control group had only  
12  
13 397 telephone-based contacts after the initial clinic-based counseling. Frequent contact in the  
14  
15 398 intervention group may have resulted in the over-reporting of outcomes, which can lead to  
16  
17 399 overestimating the intervention effect. Nevertheless, over-reporting of outcomes was  
18  
19 400 minimized by assuring the participants of the confidentiality of their responses and  
20  
21 401 conducting interviews by experienced female research assistants. Second, we collected data  
22  
23 402 on pregnancy incidence during follow-up, but the rate was too low to use as a proxy for dual-  
24  
25 403 method contraceptive use. Other clinical meaningful data, such as the incidence of STI,  
26  
27 404 should be collected to evaluate interventions for dual-method contraceptive use in future  
28  
29 405 research. Third, several characteristics of the participants were imbalanced between the  
30  
31 406 intervention and control groups due to the relatively small number of clusters. However,  
32  
33 407 random-effect model analysis was performed by controlling for cluster effects and  
34  
35 408 differences in baseline characteristics to evaluate the effects of the intervention. Lastly, this  
36  
37 409 intervention was developed based on the qualitative study of the PDs in Mbarara District and  
38  
39 410 examined its effectiveness among women in the same area. Merely applying the intervention  
40  
41 411 to other communities might not be effective, as communities' local solutions might differ.<sup>31</sup>  
42  
43 412 Therefore, each community must participate in the process of determining its own solutions.  
44  
45 413 Further research is recommended to assess the effectiveness of the positive deviance  
46  
47 414 approach in a given context with careful attention to its process.  
48  
49  
50  
51  
52  
53  
54  
55  
56  
57  
58  
59  
60

415

## 416 **Conclusion**

1  
2  
3 417 The positive deviance intervention increased dual-method contraceptive use among married  
4  
5 418 or in-union women in Mbarara District, Uganda, by disseminating solutions that exist in the  
6  
7 419 community. This approach could be a potential option to reduce the dual risk of unintended  
8  
9 420 pregnancies and HIV infections among women.  
10  
11  
12

13 421

## 17 422 **Footnotes**

18  
19 423 **Acknowledgements:** The authors would like to thank all participants for their time and  
20  
21 424 cooperation and extend their appreciation to the women joined in the trial as PDs and the  
22  
23 425 research assistants.  
24  
25

26  
27 426 **Contributors:** HK and MJ conceived the study and contributed to funding acquisition. HK,  
28  
29 427 AS, JK, KICO, and MJ contributed to the study design. HK conducted the literature review.  
30  
31 428 HK, CM, and SM led the development of the data collection instrument, data collection, and  
32  
33 429 quality assessment. HK and AS did the statistical analysis. All authors contributed to data  
34  
35 430 interpretation. HK wrote the original draft. AS, JK, KICO, SM, CM, and MJ reviewed and  
36  
37 431 revised the manuscript. All authors approved the final version for submission.  
38  
39

40  
41 432 **Funding:** HK received scholarship grant from Foundation for Advanced Studies on  
42  
43 433 International Development (FASID), Tokyo, Japan.  
44  
45

46 434 **Disclaimer:** The funding source had no role in the design and conduct of this study. S.M. works  
47  
48 435 at UNICEF Uganda, but the information in this article represents S.M.'s personal views and  
49  
50 436 opinions and does not necessarily represent UNICEF Uganda's position.  
51  
52

53  
54 437 **Competing interests:** None declared.  
55  
56  
57  
58  
59  
60

1  
2  
3 438 **Patient and public involvement:** Patients or the public were involved in the design, or  
4  
5 439 conduct, or reporting, or dissemination plans of this research. Refer to the Methods section for  
6  
7 440 further details.

8  
9  
10 441 **Patient consent:** Not required.

11  
12  
13 442 **Ethics approval:** The study was approved by the Research Ethics Committee of the Graduate  
14  
15 443 School of Medicine, University of Tokyo (2019085NI), Institutional Research and Ethics  
16  
17 444 Committee of Mbarara University of Science and Technology (IRB15/06-19), and Uganda  
18  
19 445 National Council of Science and Technology (HS439ES).

20  
21  
22  
23 446 **Provenance and peer review:** Not commissioned; externally peer reviewed.

24  
25  
26 447 **Data sharing statement:** The data underlying this study have been uploaded to the Figshare  
27  
28 448 Repository and are accessible at <https://doi.org/10.6084/m9.figshare.12936857.v1>

29  
30  
31 449



450

451

## References

- 452 1 Ameyaw EK, Budu E, Sambah F, et al. Prevalence and determinants of unintended  
453 pregnancy in sub-Saharan Africa: A multi-country analysis of demographic and health  
454 surveys. *PLoS One* 2019; **14**: e0220970.
- 455 2 UNAIDS. UNAIDS data 2018. July 26, 2018.  
456 [https://www.unaids.org/sites/default/files/media\\_asset/unaid-data-2018\\_en.pdf](https://www.unaids.org/sites/default/files/media_asset/unaid-data-2018_en.pdf) (accessed  
457 March 21, 2020).
- 458 3 Kharsany AB, Karim QA. HIV infection and AIDS in sub-Saharan Africa: Current  
459 status, challenges and opportunities. *Open AIDS J* 2016; **10**: 34–48.
- 460 4 Lopez LM, Stockton LL, Chen M, et al. Behavioral interventions for improving dual-  
461 method contraceptive use. *Cochrane Database Syst Rev* 2014; **3**: Cd010915.
- 462 5 Mutowo J, Kasu CM. Barriers to use of dual protection among married women in a  
463 Suburban setting. *Nurs Health Sci* 2015; **4**: 51–7.
- 464 6 Ott MA, Adler NE, Millstein SG, et al. The trade-off between hormonal  
465 contraceptives and condoms among adolescents. *Perspect Sex Reprod Health* 2002; **34**: 6–14.
- 466 7 Tsuyuki K, Gipson JD, Urada LA, et al. Dual protection to address the global  
467 syndemic of HIV and unintended pregnancy in Brazil. *J Fam Plann Reprod Health Care*  
468 2016; **42**: 271–9.
- 469 8 Kosugi H, Shibamura A, Kiriya J, et al. Consistent condom use among highly  
470 effective contraceptive users in an HIV-endemic area in rural Kenya. *PLoS One* 2019; **14**:  
471 e0216208.
- 472 9 Woodsong C, Koo HP. Two good reasons: Women's and men's perspectives on dual  
473 contraceptive use. *Soc Sci Med* 1999; **49**: 567–80.

- 1  
2  
3 474 10 Anglewicz P, Clark S. The effect of marriage and HIV risks on condom use  
4  
5 475 acceptability in rural Malawi. *Soc Sci Med* 2013; **97**: 29–40.  
6  
7 476 11 Peipert JF, Zhao Q, Meints L, et al. Adherence to dual-method contraceptive use.  
8  
9 477 *Contraception* 2011; **84**: 252–8.  
10  
11 478 12 Sieving RE, McRee AL, McMorris BJ, et al. Prime time: Sexual health outcomes at  
12  
13 479 24 months for a clinic-linked intervention to prevent pregnancy risk behaviors. *JAMA Pediatr*  
14  
15 480 2013; **167**: 333–40.  
16  
17 481 13 Galárraga O, Harries J, Maughan-Brown B, et al. The Empower Nudge lottery to  
18  
19 482 increase dual protection use: A proof-of-concept randomised pilot trial in South Africa.  
20  
21 483 *Reprod Health Matters* 2018; **26**: 67–80.  
22  
23 484 14 Marsh DR, Schroeder DG, Dearden KA, et al. The power of positive deviance. *BMJ*  
24  
25 485 2004; **329**: 1177–9.  
26  
27 486 15 Herington MJ, van de Fliert E. Positive deviance in theory and practice: A conceptual  
28  
29 487 review. *Deviant Behav* 2018; **39**: 664–78.  
30  
31 488 16 Kosugi H, Shibanuma A, Kiriya J, et al. Positive deviance for dual-method promotion  
32  
33 489 among women in Uganda: A qualitative study. *Int. J. Environ. Res. Public Health* 2020; **17**:  
34  
35 490 5009.  
36  
37 491 17 Kosugi H, Shibanuma A, Kiriya J, et al. Positive deviance for dual-method promotion  
38  
39 492 among women in Uganda: Study protocol for a cluster randomized controlled trial. *Trials*  
40  
41 493 2020; **21**: 270.  
42  
43 494 18 Ministry of Health, Uganda. Uganda Population-based HIV Impact Assessment  
44  
45 495 (UPHIA) 2016-2017: Final Report. Kampala: Ministry of Health, 2019.  
46  
47 496 19 Uganda Bureau of Statistics. Uganda Demographic and Health Survey 2016. 2018.  
48  
49 497 <https://dhsprogram.com/pubs/pdf/FR333/FR333.pdf> (accessed August 10, 2020).  
50  
51  
52  
53  
54  
55  
56  
57  
58  
59  
60

- 1  
2  
3 498 20 Ministry of Health, Uganda. National health facility master list 2018. Kampala:  
4  
5 499 Ministry of Health, 2089.  
6  
7  
8 500 21 Zhang J, Pals SL, Medley A, et al. Parameters for sample size estimation from a  
9  
10 501 group-randomized HIV prevention trial in HIV clinics in sub-Saharan Africa. *AIDS and*  
11  
12 502 *Behavior* 2014; **18**: 2359–65.  
13  
14  
15 503 22 WHO, Johns Hopkins Bloomberg School of Public Health. Center for  
16  
17 504 Communication Programs. Information and Knowledge for Optimal Health (INFO).  
18  
19 505 Decision-making tool for family planning clients and providers. 2005.  
20  
21 506 [https://www.who.int/reproductivehealth/publications/family\\_planning/9241593229/en/](https://www.who.int/reproductivehealth/publications/family_planning/9241593229/en/)  
22  
23 507 (accessed August 10, 2019).  
24  
25  
26 508 23 Reynolds HW, Luseno WK, Speizer IS. The measurement of condom use in four  
27  
28 509 countries in East and Southern Africa. *AIDS Behav* 2012; **16**: 1044–53.  
29  
30  
31 510 24 Carey MP, Schroder KEE. Development and psychometric evaluation of the brief  
32  
33 511 HIV Knowledge Questionnaire. *AIDS Educ Prev* 2002; **14**: 172–82.  
34  
35  
36 512 25 Shaweno D, Tekletsadik E. Validation of the condom use self-efficacy scale in  
37  
38 513 Ethiopia. *BMC Int Health Hum Rights* 2013; **13**: 22.  
39  
40  
41 514 26 Pulerwitz J, Gortmaker SL, DeJong W. Measuring sexual relationship power in  
42  
43 515 HIV/STD research. *Sex Roles* 2000; **42**: 637–60.  
44  
45  
46 516 27 Chimbiri AM. The condom is an ‘intruder’ in marriage: Evidence from rural Malawi.  
47  
48 517 *Soc Sci Med* 2007; **64**: 1102–15.  
49  
50  
51 518 28 Babalola S, Awasum D, Quenum-Renaud B. The correlates of safe sex practices  
52  
53 519 among Rwandan youth: A positive deviance approach. *Afr J AIDS Res* 2002; **1**: 11–21.  
54  
55  
56 520 29 Williamson NE, Liku J, McLoughlin K, et al. A qualitative study of condom use  
57  
58 521 among married couples in Kampala, Uganda. *Reprod Health Matters* 2006; **14**: 89–98.  
59  
60

- 1  
2  
3 522 30 Ewing AC, Kottke MJ, Kraft JM, et al. 2GETHER — The dual protection project:  
4  
5 523 Design and rationale of a randomized controlled trial to increase dual protection strategy  
6  
7 524 selection and adherence among African American adolescent females. *Contemp Clin Trials*  
8  
9 525 2017; **54**: 1–7.  
10  
11 526 31 Pascale R, Monique S, Sternin J. The power of positive deviance: How unlikely  
12  
13 527 innovators solve the world’s toughest problems. 1st ed. Brighton, Massachusetts: Harvard  
14  
15 528 Business Press; 2010.  
16  
17  
18  
19 529  
20  
21  
22  
23  
24  
25  
26  
27  
28  
29  
30  
31  
32  
33  
34  
35  
36  
37  
38  
39  
40  
41  
42  
43  
44  
45  
46  
47  
48  
49  
50  
51  
52  
53  
54  
55  
56  
57  
58  
59  
60

For peer review only

530 **Table 1. Overview of intervention**

| Training setting                      | Duration        | Topics covered                                                                                                                                                                                                                                                                                                                                                                                                                                                                                                                                                                                                                                                                                                                                                                                                                                                                                            |
|---------------------------------------|-----------------|-----------------------------------------------------------------------------------------------------------------------------------------------------------------------------------------------------------------------------------------------------------------------------------------------------------------------------------------------------------------------------------------------------------------------------------------------------------------------------------------------------------------------------------------------------------------------------------------------------------------------------------------------------------------------------------------------------------------------------------------------------------------------------------------------------------------------------------------------------------------------------------------------------------|
| Clinic-based counseling               | 20–30 mins      | <ol style="list-style-type: none"> <li>1. Comparing family planning methods</li> <li>2. HIV/STI risk</li> <li>3. Ways to avoid HIV/STIs</li> <li>4. Introduction and demonstration of male condoms</li> <li>5. Effective communication with partners</li> <li>6. Information about the workshop</li> </ol>                                                                                                                                                                                                                                                                                                                                                                                                                                                                                                                                                                                                |
| One-day workshop at a health facility | 5 hours         | <ol style="list-style-type: none"> <li>1. Introduction of family planning methods</li> <li>2. Way to avoid unintended pregnancies</li> <li>3. Introduction of HIV/STI risk</li> <li>4. Way to avoid HIV/STIs</li> <li>5. Group discussion 1: Let's consider your HIV/STI risk</li> <li>6. Practice of condom use</li> <li>7. Experience of four PDs</li> <li>8. Role-play exercises: Effective communication with partners               <ul style="list-style-type: none"> <li>- How to initiate discussions about condom use</li> <li>- How to persuade partners</li> <li>- How to avoid conflicts</li> </ul> </li> <li>9. Group Dissuasion 2: Recapitulate takeaway messages               <ul style="list-style-type: none"> <li>- Why is dual-method contraception important?</li> <li>- What are barriers to using dual-method contraception, and how can you overcome them?</li> </ul> </li> </ol> |
| Bimonthly phone-based counseling      | 15–30 mins each | <ol style="list-style-type: none"> <li>1. Brief health message:               <ul style="list-style-type: none"> <li>- Family planning methods (at 3 months)</li> <li>- Ways to avoid HIV/STIs (at 5 months)</li> <li>- General facts about HIV/STIs (at 7 months)</li> </ul> </li> <li>2. Counseling tailored to individual participants' situation and needs</li> </ol>                                                                                                                                                                                                                                                                                                                                                                                                                                                                                                                                 |

PD: positive deviant

531

532

533 **Table 2. Characteristics of women at baseline by intervention group (n = 960)**

| Variables                                    | Intervention<br>(n = 480) |       | Control<br>(n = 480) |       | Total<br>(n = 960) |       | p-value <sup>†</sup> |
|----------------------------------------------|---------------------------|-------|----------------------|-------|--------------------|-------|----------------------|
|                                              | n                         | %     | n                    | %     | n                  | %     |                      |
| <b>1) Sociodemographic characteristics</b>   |                           |       |                      |       |                    |       |                      |
| Age in years, mean (SD)                      | 30.4                      | (6.5) | 29.8                 | (6.8) | 30.1               | (6.7) | 0.126                |
| <b>Education</b>                             |                           |       |                      |       |                    |       |                      |
| Never                                        | 145                       | 30.2  | 117                  | 24.4  | 262                | 27.3  | <b>0.042</b>         |
| Primary and more                             | 335                       | 69.8  | 363                  | 75.6  | 698                | 72.7  |                      |
| <b>Religion</b>                              |                           |       |                      |       |                    |       |                      |
| Christian                                    | 450                       | 93.8  | 436                  | 90.8  | 886                | 92.3  | 0.090                |
| Muslim                                       | 30                        | 6.3   | 44                   | 9.2   | 74                 | 7.7   |                      |
| <b>Wealth index</b>                          |                           |       |                      |       |                    |       |                      |
| Poor                                         | 176                       | 36.7  | 158                  | 32.9  | 334                | 34.8  | <b>0.008</b>         |
| Middle                                       | 168                       | 35.0  | 141                  | 29.4  | 309                | 32.2  |                      |
| Rich                                         | 136                       | 28.3  | 181                  | 37.7  | 317                | 33.0  |                      |
| No. of children, mean (SD)                   | 3.2                       | (1.7) | 2.9                  | (1.8) | 3.0                | (1.8) | <b>0.041</b>         |
| <b>Pregnancy intention</b>                   |                           |       |                      |       |                    |       |                      |
| No                                           | 100                       | 20.8  | 96                   | 20.0  | 196                | 20.4  | 0.822                |
| Yes                                          | 342                       | 71.3  | 341                  | 71.0  | 683                | 71.2  |                      |
| Don't know                                   | 38                        | 7.9   | 43                   | 9.0   | 81                 | 8.4   |                      |
| <b>Partner's pregnancy intention</b>         |                           |       |                      |       |                    |       |                      |
| No                                           | 69                        | 14.4  | 68                   | 14.2  | 137                | 14.3  | 0.776                |
| Yes                                          | 322                       | 67.1  | 331                  | 69.0  | 653                | 68.0  |                      |
| Don't know                                   | 89                        | 18.5  | 81                   | 16.9  | 170                | 17.7  |                      |
| <b>History of unintended pregnancy</b>       |                           |       |                      |       |                    |       |                      |
| No                                           | 313                       | 65.2  | 335                  | 69.8  | 648                | 67.5  | 0.130                |
| Yes                                          | 167                       | 34.8  | 145                  | 30.2  | 312                | 32.5  |                      |
| <b>Multiple sex partners</b>                 |                           |       |                      |       |                    |       |                      |
| No                                           | 452                       | 94.2  | 456                  | 95.0  | 908                | 94.6  | 0.568                |
| Yes                                          | 28                        | 5.8   | 24                   | 5.0   | 52                 | 5.4   |                      |
| <b>2) HIV-related characteristics</b>        |                           |       |                      |       |                    |       |                      |
| <b>HIV status</b>                            |                           |       |                      |       |                    |       |                      |
| Negative                                     | 438                       | 91.3  | 436                  | 90.8  | 874                | 91.0  | 0.821                |
| Positive                                     | 42                        | 8.8   | 44                   | 9.2   | 86                 | 9.0   |                      |
| <b>Partner's HIV status</b>                  |                           |       |                      |       |                    |       |                      |
| Negative                                     | 386                       | 80.4  | 373                  | 77.7  | 759                | 79.1  | 0.587                |
| Positive                                     | 34                        | 7.1   | 39                   | 8.1   | 73                 | 7.6   |                      |
| Don't know                                   | 60                        | 12.5  | 68                   | 14.2  | 128                | 13.3  |                      |
| <b>Disclosure of HIV status</b>              |                           |       |                      |       |                    |       |                      |
| No                                           | 21                        | 4.4   | 19                   | 4.0   | 40                 | 4.2   | 0.747                |
| Yes                                          | 459                       | 95.6  | 461                  | 96.0  | 920                | 95.8  |                      |
| <b>HIV/STI risk perception</b>               |                           |       |                      |       |                    |       |                      |
| No risk at all                               | 62                        | 12.9  | 87                   | 18.1  | 149                | 15.5  | 0.124                |
| Small                                        | 177                       | 36.9  | 178                  | 37.1  | 355                | 37.0  |                      |
| Moderate                                     | 136                       | 28.3  | 124                  | 25.8  | 260                | 27.1  |                      |
| Great                                        | 105                       | 21.9  | 91                   | 19.0  | 196                | 20.4  |                      |
| <b>3) HEC use</b>                            |                           |       |                      |       |                    |       |                      |
| <b>Type of HECs</b>                          |                           |       |                      |       |                    |       |                      |
| Injectables                                  | 252                       | 52.5  | 246                  | 51.3  | 498                | 51.9  | 0.599                |
| Implants                                     | 155                       | 32.3  | 148                  | 30.8  | 303                | 31.6  |                      |
| IUDs                                         | 43                        | 9.0   | 54                   | 11.3  | 97                 | 10.1  |                      |
| OCPs                                         | 27                        | 5.6   | 31                   | 6.5   | 58                 | 6.0   |                      |
| Female sterilization                         | 3                         | 0.6   | 1                    | 0.2   | 4                  | 0.4   |                      |
| <b>Partner's recognition of HEC use</b>      |                           |       |                      |       |                    |       |                      |
| No                                           | 36                        | 7.5   | 43                   | 9.0   | 79                 | 8.2   | 0.411                |
| Yes                                          | 444                       | 92.5  | 437                  | 91.0  | 881                | 91.8  |                      |
| <b>Partner's attitude about HEC use</b>      |                           |       |                      |       |                    |       |                      |
| Positive                                     | 432                       | 90.0  | 439                  | 91.7  | 871                | 90.8  | 0.229                |
| Negative                                     | 36                        | 7.5   | 35                   | 7.3   | 71                 | 7.4   |                      |
| Don't know                                   | 12                        | 2.5   | 5                    | 1.0   | 17                 | 1.8   |                      |
| <b>4) Other psychosocial characteristics</b> |                           |       |                      |       |                    |       |                      |
| HIV-related knowledge (HIV-KQ-18), mean (SD) | 11.9                      | (2.6) | 11.3                 | (3.0) | 11.6               | (2.8) | <b>&lt;0.001</b>     |
| Condom use self-efficacy scale, mean (SD)    | 22.3                      | (9.3) | 22.1                 | (8.3) | 22.2               | (8.8) | 0.682                |
| <b>Sexual Relationship Power Scale</b>       |                           |       |                      |       |                    |       |                      |
| Low                                          | 173                       | 36.0  | 152                  | 31.7  | 325                | 33.9  | 0.352                |
| Medium                                       | 168                       | 35.0  | 182                  | 37.9  | 350                | 36.5  |                      |
| High                                         | 139                       | 29.0  | 146                  | 30.4  | 285                | 29.7  |                      |

SD: standard deviation; HEC: highly effective contraceptive; IUD: intrauterine device; OCP: oral contraceptive pill

<sup>†</sup>Based on chi-squared test for other categorical variables and t-test for continuous variables534  
535

536 **Table 3. Dual-method contraceptive use, communication about HIV/STI risk, pregnancy incidence by intervention group and time<sup>a</sup>**

| Outcomes                                                        | Intervention |      | Control |      | Total |      | p-value <sup>†</sup> |
|-----------------------------------------------------------------|--------------|------|---------|------|-------|------|----------------------|
|                                                                 | n            | %    | n       | %    | n     | %    |                      |
| <b>Dual-method contraceptive use at last sexual intercourse</b> |              |      |         |      |       |      |                      |
| Baseline                                                        | 41           | 8.5  | 28      | 5.8  | 69    | 7.2  | 0.104                |
| Month 2                                                         | 157          | 42.6 | 46      | 13.8 | 203   | 28.9 | <0.001               |
| Month 4                                                         | 110          | 27.9 | 55      | 15.4 | 165   | 21.9 | <0.001               |
| Month 6                                                         | 91           | 23.3 | 40      | 10.7 | 131   | 17.2 | <0.001               |
| Month 8                                                         | 82           | 20.9 | 33      | 8.7  | 115   | 14.9 | <0.001               |
| <b>Consistent dual-method contraceptive use</b>                 |              |      |         |      |       |      |                      |
| Baseline                                                        | -            | -    | -       | -    | -     | -    | -                    |
| Month 2                                                         | 57           | 15.5 | 5       | 1.5  | 62    | 8.8  | <0.001               |
| Month 4                                                         | 42           | 10.7 | 8       | 2.2  | 50    | 6.7  | <0.001               |
| Month 6                                                         | 32           | 8.2  | 5       | 1.3  | 37    | 4.9  | <0.001               |
| Month 8                                                         | 44           | 11.2 | 5       | 1.3  | 49    | 6.4  | <0.001               |
| <b>Communication about HIV/STI risk</b>                         |              |      |         |      |       |      |                      |
| Baseline                                                        | 229          | 47.7 | 225     | 46.9 | 454   | 47.3 | 0.796                |
| Month 2                                                         | 308          | 83.5 | 216     | 64.9 | 524   | 74.6 | <0.001               |
| Month 4                                                         | 348          | 88.3 | 289     | 80.7 | 637   | 84.7 | 0.004                |
| Month 6                                                         | 360          | 92.3 | 292     | 78.3 | 652   | 85.5 | <0.001               |
| Month 8                                                         | 333          | 84.7 | 288     | 76.0 | 621   | 80.4 | 0.002                |
| <b>Pregnancy incidence</b>                                      |              |      |         |      |       |      |                      |
| Baseline                                                        | -            | -    | -       | -    | -     | -    | -                    |
| Month 2                                                         | 2            | 0.5  | 4       | 1.1  | 6     | 0.8  | 0.353                |
| Month 4                                                         | 2            | 0.5  | 4       | 1.1  | 6     | 0.8  | 0.369                |
| Month 6                                                         | 0            | 0.0  | 2       | 0.5  | 2     | 0.3  | 0.152                |
| Month 8                                                         | 2            | 0.5  | 5       | 1.3  | 7     | 0.9  | 0.228                |

<sup>a</sup>Refer to Figure 2 for “n” at baseline and follow-up for each group

<sup>†</sup>Based on chi-squared test

**Table 4. Effects of intervention on primary and secondary outcomes among women at 2, 4, 6, and 8 months after enrollment**

| Variables                                                       | Month 2                  |                              |                              | Month 4                 |                              |                              | Month 6                 |                              |                              | Month 8                 |                              |                              |
|-----------------------------------------------------------------|--------------------------|------------------------------|------------------------------|-------------------------|------------------------------|------------------------------|-------------------------|------------------------------|------------------------------|-------------------------|------------------------------|------------------------------|
|                                                                 | Model 1                  | Model 2                      | Model 3                      | Model 1                 | Model 2                      | Model 3                      | Model 1                 | Model 2                      | Model 3                      | Model 1                 | Model 2                      | Model 3                      |
|                                                                 | OR<br>(95% CI)           | AOR <sup>a</sup><br>(95% CI) | AOR <sup>b</sup><br>(95% CI) | OR<br>(95% CI)          | AOR <sup>a</sup><br>(95% CI) | AOR <sup>b</sup><br>(95% CI) | OR<br>(95% CI)          | AOR <sup>a</sup><br>(95% CI) | AOR <sup>b</sup><br>(95% CI) | OR<br>(95% CI)          | AOR <sup>a</sup><br>(95% CI) | AOR <sup>b</sup><br>(95% CI) |
| <b>Dual-method contraceptive use at last sexual intercourse</b> | 4.62***<br>(3.18-6.71)   | 4.29***<br>(2.12-8.69)       | 4.12***<br>(2.02-8.39)       | 2.13***<br>(1.49-3.06)  | 1.66<br>(0.84-3.30)          | 1.66<br>(0.84-3.30)          | 2.53***<br>(1.69-3.79)  | 2.04<br>(1.00-4.17)          | 2.03<br>(0.99-4.14)          | 2.76***<br>(1.79-4.26)  | 2.19*<br>(1.07-4.48)         | 2.16*<br>(1.06-4.41)         |
| <b>Consistent dual-method contraceptive use</b>                 | 11.98***<br>(4.74-30.29) | 13.71***<br>(3.59-52.43)     | 14.53***<br>(3.63-58.13)     | 5.22***<br>(2.42-11.28) | 6.28**<br>(2.01-19.60)       | 6.30**<br>(2.20-18.03)       | 6.58***<br>(2.53-17.07) | 7.80*<br>(1.22-49.73)        | 8.04*<br>(1.17-55.08)        | 9.43***<br>(3.70-24.06) | 9.97**<br>(2.11-47.15)       | 10.72**<br>(2.03-56.64)      |
| <b>Communication about HIV/STI risk</b>                         | 2.73***<br>(1.92-3.90)   | 2.70***<br>(1.72-4.23)       | 2.70***<br>(1.72-4.24)       | 1.81**<br>(1.21-2.71)   | 1.76*<br>(1.08-2.86)         | 1.76*<br>(1.07-2.89)         | 3.33***<br>(2.13-5.20)  | 3.23***<br>(1.93-5.41)       | 3.35***<br>(1.99-5.66)       | 1.75**<br>(1.22-2.52)   | 1.75*<br>(1.12-2.74)         | 1.80*<br>(1.14-2.84)         |
| <b>Pregnancy incidence</b>                                      | 0.46<br>(0.08-2.50)      | 0.46<br>(0.08-2.50)          | 1.21<br>(0.09-15.75)         | 0.47<br>(0.08-2.56)     | 0.47<br>(0.08-2.56)          | 0.23<br>(0.00-17.34)         | Perfect success         |                              |                              | 0.38<br>(0.07-1.96)     | 0.38<br>(0.07-2.19)          | 0.40<br>(0.02-8.19)          |

Note: Table reports effects estimates using odds ratio (OR) and adjusted odds ratio (AOR) from multiple logistic regression using the control group as the reference category.

\*\*\*p < 0.001, \*\*p < 0.01, \*p < 0.05

a. Adjusted for the cluster effect and individuals

b. Adjusted for cluster effect, individuals, age, education, religion, wealth index, number of children, pregnancy intention, partner's pregnancy intention, history of unintended pregnancy, multiple sex partnership, HEC methods, HIV status, partner's HIV status, HIV/STI risk perception, HIV-related knowledge, condom use self-efficacy, and sexual relationship control power.



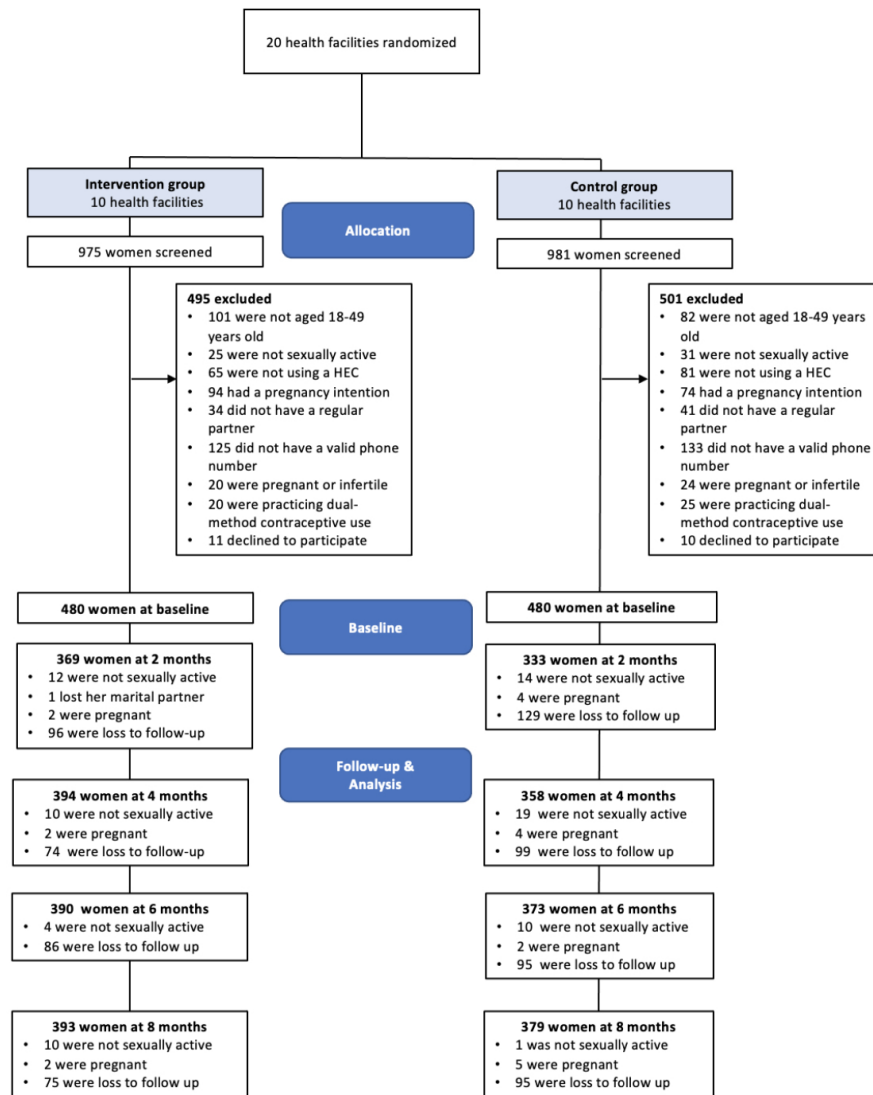

HEC: highly effective contraceptive

Figure 1. Flow of participants through the study

202x265mm (144 x 144 DPI)

## S1 Table CONSORT checklist

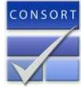

### CONSORT 2010 checklist of information to include when reporting a randomised trial\*

| Section/Topic                    | Item No | Checklist item                                                                                                                                                                              | Reported on page No |
|----------------------------------|---------|---------------------------------------------------------------------------------------------------------------------------------------------------------------------------------------------|---------------------|
| <b>Title and abstract</b>        |         |                                                                                                                                                                                             |                     |
|                                  | 1a      | Identification as a randomised trial in the title                                                                                                                                           | p 1                 |
|                                  | 1b      | Structured summary of trial design, methods, results, and conclusions (for specific guidance see CONSORT for abstracts)                                                                     | p 2 and 3           |
| <b>Introduction</b>              |         |                                                                                                                                                                                             |                     |
| Background and objectives        | 2a      | Scientific background and explanation of rationale                                                                                                                                          | p 4-6               |
|                                  | 2b      | Specific objectives or hypotheses                                                                                                                                                           | p 6                 |
| <b>Methods</b>                   |         |                                                                                                                                                                                             |                     |
| Trial design                     | 3a      | Description of trial design (such as parallel, factorial) including allocation ratio                                                                                                        | p 6                 |
|                                  | 3b      | Important changes to methods after trial commencement (such as eligibility criteria), with reasons                                                                                          | NA                  |
| Participants                     | 4a      | Eligibility criteria for participants                                                                                                                                                       | p 6 and 7           |
|                                  | 4b      | Settings and locations where the data were collected                                                                                                                                        | p 6 and 12          |
| Interventions                    | 5       | The interventions for each group with sufficient details to allow replication, including how and when they were actually administered                                                       | p 8-10              |
| Outcomes                         | 6a      | Completely defined pre-specified primary and secondary outcome measures, including how and when they were assessed                                                                          | p 10-12             |
|                                  | 6b      | Any changes to trial outcomes after the trial commenced, with reasons                                                                                                                       | p 11 and 12         |
| Sample size                      | 7a      | How sample size was determined                                                                                                                                                              | p 7                 |
|                                  | 7b      | When applicable, explanation of any interim analyses and stopping guidelines                                                                                                                | NA                  |
| <b>Randomisation:</b>            |         |                                                                                                                                                                                             |                     |
| Sequence generation              | 8a      | Method used to generate the random allocation sequence                                                                                                                                      | p 7 and 8           |
|                                  | 8b      | Type of randomisation; details of any restriction (such as blocking and block size)                                                                                                         | p 7 and 8           |
| Allocation concealment mechanism | 9       | Mechanism used to implement the random allocation sequence (such as sequentially numbered containers), describing any steps taken to conceal the sequence until interventions were assigned | p 7 and 8           |

|    |                                                      |     |                                                                                                                                                   |                       |
|----|------------------------------------------------------|-----|---------------------------------------------------------------------------------------------------------------------------------------------------|-----------------------|
| 1  |                                                      |     |                                                                                                                                                   |                       |
| 2  | Implementation                                       | 10  | Who generated the random allocation sequence, who enrolled participants, and who assigned participants to interventions                           | p 7 and 8             |
| 3  |                                                      |     |                                                                                                                                                   |                       |
| 4  | Blinding                                             | 11a | If done, who was blinded after assignment to interventions (for example, participants, care providers, those assessing outcomes) and how          | p 8                   |
| 5  |                                                      |     |                                                                                                                                                   |                       |
| 6  |                                                      | 11b | If relevant, description of the similarity of interventions                                                                                       | NA                    |
| 7  | Statistical methods                                  | 12a | Statistical methods used to compare groups for primary and secondary outcomes                                                                     | p 12 and 13           |
| 8  |                                                      |     |                                                                                                                                                   |                       |
| 9  |                                                      | 12b | Methods for additional analyses, such as subgroup analyses and adjusted analyses                                                                  | p 12 and 13           |
| 10 |                                                      |     |                                                                                                                                                   |                       |
| 11 | <b>Results</b>                                       |     |                                                                                                                                                   |                       |
| 12 | Participant flow (a diagram is strongly recommended) | 13a | For each group, the numbers of participants who were randomly assigned, received intended treatment, and were analysed for the primary outcome    | p 14                  |
| 13 |                                                      |     |                                                                                                                                                   |                       |
| 14 |                                                      | 13b | For each group, losses and exclusions after randomisation, together with reasons                                                                  | p 14 and Figure 1     |
| 15 |                                                      |     |                                                                                                                                                   |                       |
| 16 | Recruitment                                          | 14a | Dates defining the periods of recruitment and follow-up                                                                                           | p 6 and 12            |
| 17 |                                                      |     |                                                                                                                                                   |                       |
| 18 |                                                      | 14b | Why the trial ended or was stopped                                                                                                                | p 6                   |
| 19 | Baseline data                                        | 15  | A table showing baseline demographic and clinical characteristics for each group                                                                  | p 27                  |
| 20 | Numbers analysed                                     | 16  | For each group, number of participants (denominator) included in each analysis and whether the analysis was by original assigned groups           | p 14                  |
| 21 |                                                      |     |                                                                                                                                                   |                       |
| 22 | Outcomes and estimation                              | 17a | For each primary and secondary outcome, results for each group, and the estimated effect size and its precision (such as 95% confidence interval) | p 14-16               |
| 23 |                                                      |     |                                                                                                                                                   |                       |
| 24 |                                                      | 17b | For binary outcomes, presentation of both absolute and relative effect sizes is recommended                                                       | p 14-16               |
| 25 | Ancillary analyses                                   | 18  | Results of any other analyses performed, including subgroup analyses and adjusted analyses, distinguishing pre-specified from exploratory         | p 14 and S2-17 Tables |
| 26 |                                                      |     |                                                                                                                                                   |                       |
| 27 | Harms                                                | 19  | All important harms or unintended effects in each group (for specific guidance see CONSORT for harms)                                             | NA                    |
| 28 |                                                      |     |                                                                                                                                                   |                       |
| 29 | <b>Discussion</b>                                    |     |                                                                                                                                                   |                       |
| 30 | Limitations                                          | 20  | Trial limitations, addressing sources of potential bias, imprecision, and, if relevant, multiplicity of analyses                                  | p 19                  |
| 31 | Generalisability                                     | 21  | Generalisability (external validity, applicability) of the trial findings                                                                         | p 19                  |
| 32 | Interpretation                                       | 22  | Interpretation consistent with results, balancing benefits and harms, and considering other relevant evidence                                     | p 16-20               |
| 33 |                                                      |     |                                                                                                                                                   |                       |
| 34 | <b>Other information</b>                             |     |                                                                                                                                                   |                       |
| 35 | Registration                                         | 23  | Registration number and name of trial registry                                                                                                    | p 3 and 13            |
| 36 | Protocol                                             | 24  | Where the full trial protocol can be accessed, if available                                                                                       | p 6                   |
| 37 | Funding                                              | 25  | Sources of funding and other support (such as supply of drugs), role of funders                                                                   | p 20                  |
| 38 |                                                      |     |                                                                                                                                                   |                       |
| 39 |                                                      |     |                                                                                                                                                   |                       |
| 40 |                                                      |     |                                                                                                                                                   |                       |

1  
2 \*We strongly recommend reading this statement in conjunction with the CONSORT 2010 Explanation and Elaboration for important clarifications on all the items. If relevant, we also  
3 recommend reading CONSORT extensions for cluster randomised trials, non-inferiority and equivalence trials, non-pharmacological treatments, herbal interventions, and pragmatic trials.  
4 Additional extensions are forthcoming: for those and for up to date references relevant to this checklist, see [www.consort-statement.org](http://www.consort-statement.org).  
5  
6  
7  
8  
9  
10  
11  
12  
13  
14  
15  
16  
17  
18  
19  
20  
21  
22  
23  
24  
25  
26  
27  
28  
29  
30  
31  
32  
33  
34  
35  
36  
37  
38  
39  
40  
41  
42  
43  
44  
45  
46  
47

For peer review only

Table S2. Baseline characteristics of women lost to follow up in the intervention and control groups

| Variables                                   | Month 2      |                   |      |       |                      |      |         |                   |       |                  |                      |      | Month 4      |                   |       |       |                      |       |         |                   |              |      |                      |       | Month 6      |                   |              |       |                      |      |         |                   |     |       |                      |       | Month 8 |       |       |       |       |       |              |  |  |  |  |  |
|---------------------------------------------|--------------|-------------------|------|-------|----------------------|------|---------|-------------------|-------|------------------|----------------------|------|--------------|-------------------|-------|-------|----------------------|-------|---------|-------------------|--------------|------|----------------------|-------|--------------|-------------------|--------------|-------|----------------------|------|---------|-------------------|-----|-------|----------------------|-------|---------|-------|-------|-------|-------|-------|--------------|--|--|--|--|--|
|                                             | Intervention |                   |      |       |                      |      | Control |                   |       |                  |                      |      | Intervention |                   |       |       |                      |       | Control |                   |              |      |                      |       | Intervention |                   |              |       |                      |      | Control |                   |     |       |                      |       |         |       |       |       |       |       |              |  |  |  |  |  |
|                                             | Reached      | Lost to follow-up | n    | %     | p-value <sup>†</sup> |      | Reached | Lost to follow-up | n     | %                | p-value <sup>†</sup> |      | Reached      | Lost to follow-up | n     | %     | p-value <sup>†</sup> |       | Reached | Lost to follow-up | n            | %    | p-value <sup>†</sup> |       | Reached      | Lost to follow-up | n            | %     | p-value <sup>†</sup> |      | Reached | Lost to follow-up | n   | %     | p-value <sup>†</sup> |       |         |       |       |       |       |       |              |  |  |  |  |  |
| <b>1) Socio-demographic characteristics</b> |              |                   |      |       |                      |      |         |                   |       |                  |                      |      |              |                   |       |       |                      |       |         |                   |              |      |                      |       |              |                   |              |       |                      |      |         |                   |     |       |                      |       |         |       |       |       |       |       |              |  |  |  |  |  |
| Age in years, mean (SD)                     | 30.6         | (6.5)             | 29.8 | (6.7) | 0.291                | 30.5 | (7.0)   | 27.7              | (5.8) | <b>&lt;0.001</b> |                      | 30.4 | (6.4)        | 30.5              | (6.9) | 0.965 | 30.2                 | (6.9) | 28.1    | (6.1)             | <b>0.006</b> |      | 30.6                 | (6.4) | 29.5         | (6.8)             | 0.166        | 30.1  | (6.9)                | 28.3 | (6.2)   | <b>0.016</b>      |     | 30.6  | (6.4)                | 29.5  | (7.2)   | 0.158 | 30.1  | (6.9) | 28.5  | (6.1) | <b>0.044</b> |  |  |  |  |  |
| <b>Education</b>                            |              |                   |      |       |                      |      |         |                   |       |                  |                      |      |              |                   |       |       |                      |       |         |                   |              |      |                      |       |              |                   |              |       |                      |      |         |                   |     |       |                      |       |         |       |       |       |       |       |              |  |  |  |  |  |
| Never                                       | 114          | 29.8              | 31   | 32.0  | 0.674                | 78   | 22.2    | 39                | 30.2  | 0.070            |                      | 122  | 30.1         | 23                | 31.1  | 0.859 | 88                   | 23.1  | 29      | 29.3              | 0.201        |      | 118                  | 30.0  | 27           | 31.4              | 0.791        | 88    | 22.9                 | 29   | 30.5    | 0.119             | 119 | 29.4  | 26                   | 34.7  | 0.360   | 87    | 22.6  | 30    | 31.6  | 0.068 |              |  |  |  |  |  |
| Primary and more                            | 269          | 70.2              | 66   | 68.0  |                      | 273  | 77.8    | 90                | 69.8  |                  | 284                  | 70.0 | 51           | 68.9              |       | 293   | 76.9                 | 70    | 70.7    |                   | 276          | 70.1 | 59                   | 68.6  |              | 297               | 77.1         | 66    | 69.5                 |      | 286     | 70.6              | 49  | 65.3  |                      | 298   | 77.4    | 65    | 68.4  |       |       |       |              |  |  |  |  |  |
| <b>Religion</b>                             |              |                   |      |       |                      |      |         |                   |       |                  |                      |      |              |                   |       |       |                      |       |         |                   |              |      |                      |       |              |                   |              |       |                      |      |         |                   |     |       |                      |       |         |       |       |       |       |       |              |  |  |  |  |  |
| Christian                                   | 356          | 93.0              | 94   | 96.9  | 0.150                | 320  | 91.2    | 116               | 89.9  | 0.675            |                      | 378  | 93.1         | 72                | 97.3  | 0.170 | 345                  | 90.6  | 91      | 91.9              | 0.674        |      | 366                  | 92.9  | 84           | 96.9              | 0.097        | 349   | 90.7                 | 87   | 91.6    | 0.779             | 376 | 92.8  | 74                   | 98.7  | 0.055   | 349   | 90.7  | 87    | 91.6  | 0.779 |              |  |  |  |  |  |
| Muslim                                      | 27           | 7.1               | 3    | 3.1   |                      | 31   | 8.8     | 13                | 10.1  |                  | 28                   | 6.9  | 2            | 2.7               |       | 36    | 9.5                  | 8     | 8.1     |                   | 28           | 7.1  | 2                    | 3.1   |              | 36                | 9.4          | 8     | 8.4                  |      | 29      | 7.2               | 1   | 1.3   |                      | 36    | 9.4     | 8     | 8.4   |       |       |       |              |  |  |  |  |  |
| <b>Wealth index</b>                         |              |                   |      |       |                      |      |         |                   |       |                  |                      |      |              |                   |       |       |                      |       |         |                   |              |      |                      |       |              |                   |              |       |                      |      |         |                   |     |       |                      |       |         |       |       |       |       |       |              |  |  |  |  |  |
| Poor                                        | 139          | 36.3              | 37   | 38.1  | 0.821                | 119  | 33.9    | 39                | 30.2  | 0.070            |                      | 142  | 35.0         | 34                | 46.0  | 0.190 | 133                  | 34.9  | 25      | 25.3              | 0.188        |      | 139                  | 35.3  | 37           | 43.0              | 0.134        | 135   | 35.1                 | 23   | 24.2    | 0.119             | 143 | 35.3  | 33                   | 44.0  | 0.112   | 135   | 35.1  | 23    | 24.2  | 0.119 |              |  |  |  |  |  |
| Middle                                      | 133          | 34.7              | 35   | 36.1  |                      | 93   | 26.5    | 48                | 37.2  |                  | 145                  | 35.7 | 23           | 31.1              |       | 108   | 28.4                 | 33    | 33.3    |                   | 136          | 34.5 | 32                   | 37.2  |              | 111               | 28.8         | 30    | 31.6                 |      | 140     | 34.6              | 28  | 37.0  |                      | 111   | 28.8    | 30    | 31.6  |       |       |       |              |  |  |  |  |  |
| Rich                                        | 111          | 29.0              | 25   | 25.8  |                      | 139  | 39.6    | 42                | 32.6  |                  | 119                  | 29.3 | 17           | 23.0              |       | 140   | 36.8                 | 41    | 41.4    |                   | 119          | 30.2 | 17                   | 19.8  |              | 139               | 36.1         | 42    | 44.2                 |      | 122     | 30.1              | 14  | 18.7  |                      | 139   | 36.1    | 42    | 44.2  |       |       |       |              |  |  |  |  |  |
| <b>No. of children, mean (SD)</b>           | 3.2          | (1.7)             | 3.0  | (1.7) | 0.428                | 3.0  | (1.9)   | 2.7               | (1.7) | 0.099            |                      | 3.2  | (1.7)        | 3.1               | (1.9) | 0.859 | 3.0                  | (1.9) | 2.6     | (1.7)             | <b>0.044</b> |      | 3.2                  | (1.7) | 3.0          | (1.8)             | 0.394        | 3.0   | (1.8)                | 2.8  | (1.9)   | 0.343             | 3.2 | (1.7) | 3.0                  | (1.9) | 0.438   | 2.9   | (1.9) | 2.8   | (1.8) | 0.607 |              |  |  |  |  |  |
| <b>Pregnancy intention</b>                  |              |                   |      |       |                      |      |         |                   |       |                  |                      |      |              |                   |       |       |                      |       |         |                   |              |      |                      |       |              |                   |              |       |                      |      |         |                   |     |       |                      |       |         |       |       |       |       |       |              |  |  |  |  |  |
| No                                          | 81           | 21.2              | 19   | 19.6  | 0.891                | 76   | 21.7    | 20                | 15.5  | 0.195            |                      | 83   | 20.4         | 17                | 23.0  | 0.391 | 78                   | 20.5  | 18      | 18.2              | 0.126        |      | 84                   | 21.3  | 16           | 18.6              | 0.349        | 77    | 20.0                 | 19   | 20.0    | 0.190             | 88  | 21.7  | 12                   | 16.0  | 0.442   | 75    | 19.5  | 21    | 22.1  | 0.462 |              |  |  |  |  |  |
| Yes                                         | 271          | 70.8              | 71   | 73.2  |                      | 247  | 70.4    | 94                | 72.9  |                  | 288                  | 70.9 | 54           | 73.0              |       | 274   | 71.9                 | 67    | 67.7    |                   | 276          | 70.1 | 66                   | 76.7  |              | 278               | 72.2         | 63    | 66.3                 |      | 284     | 70.1              | 58  | 77.3  |                      | 278   | 72.2    | 63    | 66.3  |       |       |       |              |  |  |  |  |  |
| Don't know                                  | 31           | 8.1               | 7    | 7.2   |                      | 28   | 8.0     | 15                | 11.6  |                  | 35                   | 8.6  | 3            | 4.1               |       | 29    | 7.6                  | 14    | 14.1    |                   | 34           | 8.6  | 4                    | 4.7   |              | 30                | 7.8          | 13    | 13.7                 |      | 33      | 8.2               | 5   | 6.7   |                      | 32    | 8.3     | 11    | 11.6  |       |       |       |              |  |  |  |  |  |
| <b>Partner's pregnancy intention</b>        |              |                   |      |       |                      |      |         |                   |       |                  |                      |      |              |                   |       |       |                      |       |         |                   |              |      |                      |       |              |                   |              |       |                      |      |         |                   |     |       |                      |       |         |       |       |       |       |       |              |  |  |  |  |  |
| No                                          | 57           | 14.9              | 12   | 12.4  | 0.462                | 53   | 15.1    | 15                | 11.6  | 0.293            |                      | 58   | 14.8         | 14                | 18.9  | 0.454 | 57                   | 15.0  | 11      | 11.1              | 0.541        |      | 58                   | 14.7  | 11           | 12.8              | 0.896        | 55    | 14.3                 | 13   | 13.7    | 0.833             | 61  | 15.1  | 8                    | 10.7  | 0.600   | 54    | 14.0  | 14    | 14.7  | 0.799 |              |  |  |  |  |  |
| Yes                                         | 259          | 67.6              | 63   | 65.0  |                      | 235  | 67.0    | 96                | 74.4  |                  | 276                  | 68.0 | 46           | 62.2              |       | 262   | 68.8                 | 69    | 69.7    |                   | 263          | 66.8 | 59                   | 68.6  |              | 267               | 69.4         | 64    | 67.4                 |      | 269     | 66.4              | 53  | 70.7  |                      | 268   | 69.6    | 63    | 66.3  |       |       |       |              |  |  |  |  |  |
| Don't know                                  | 67           | 17.5              | 22   | 22.7  |                      | 63   | 18.0    | 18                | 14.0  |                  | 75                   | 18.5 | 14           | 18.9              |       | 62    | 16.3                 | 19    | 19.2    |                   | 73           | 18.5 | 16                   | 18.6  |              | 63                | 16.4         | 18    | 19.0                 |      | 75      | 18.5              | 14  | 18.7  |                      | 63    | 16.4    | 18    | 19.0  |       |       |       |              |  |  |  |  |  |
| <b>History of unintended pregnancy</b>      |              |                   |      |       |                      |      |         |                   |       |                  |                      |      |              |                   |       |       |                      |       |         |                   |              |      |                      |       |              |                   |              |       |                      |      |         |                   |     |       |                      |       |         |       |       |       |       |       |              |  |  |  |  |  |
| No                                          | 245          | 64.0              | 68   | 70.1  | 0.257                | 248  | 70.7    | 87                | 67.4  | 0.497            |                      | 266  | 65.5         | 47                | 63.5  | 0.739 | 265                  | 69.6  | 70      | 70.7              | 0.824        |      | 258                  | 65.5  | 55           | 64.0              | 0.787        | 265   | 68.8                 | 70   | 73.7    | 0.356             | 261 | 64.4  | 52                   | 69.3  | 0.414   | 266   | 69.1  | 69    | 72.6  | 0.501 |              |  |  |  |  |  |
| Yes                                         | 138          | 36.0              | 29   | 29.9  |                      | 103  | 29.3    | 42                | 32.6  |                  | 140                  | 34.5 | 27           | 36.5              |       | 116   | 30.5                 | 29    | 29.3    |                   | 138          | 34.5 | 31                   | 36.1  |              | 120               | 31.2         | 25    | 26.3                 |      | 144     | 35.6              | 23  | 30.7  |                      | 119   | 30.9    | 26    | 27.4  |       |       |       |              |  |  |  |  |  |
| <b>Multiple sex partners</b>                |              |                   |      |       |                      |      |         |                   |       |                  |                      |      |              |                   |       |       |                      |       |         |                   |              |      |                      |       |              |                   |              |       |                      |      |         |                   |     |       |                      |       |         |       |       |       |       |       |              |  |  |  |  |  |
| No                                          | 360          | 94.0              | 92   | 94.9  | 0.750                | 333  | 94.9    | 123               | 95.4  | 0.832            |                      | 382  | 94.1         | 70                | 89.2  | 0.864 | 361                  | 94.8  | 95      | 96.0              | 0.623        |      | 371                  | 94.2  | 81           | 94.2              | 0.993        | 365   | 94.8                 | 91   | 95.8    | 0.693             | 380 | 93.8  | 72                   | 96.0  | 0.461   | 365   | 94.8  | 91    | 95.8  | 0.693 |              |  |  |  |  |  |
| Yes                                         | 23           | 6.0               | 5    | 5.2   |                      | 18   | 5.1     | 6                 | 4.7   |                  | 24                   | 5.9  | 4            | 10.8              |       | 20    | 5.3                  | 4     | 4.0     |                   | 23           | 5.8  | 5                    | 5.8   |              | 20                | 5.2          | 4     | 4.2                  |      | 25      | 6.2               | 3   | 4.0   |                      | 20    | 5.2     | 4     | 4.2   |       |       |       |              |  |  |  |  |  |
| <b>2) HIV-related characteristics</b>       |              |                   |      |       |                      |      |         |                   |       |                  |                      |      |              |                   |       |       |                      |       |         |                   |              |      |                      |       |              |                   |              |       |                      |      |         |                   |     |       |                      |       |         |       |       |       |       |       |              |  |  |  |  |  |
| <b>HIV status</b>                           |              |                   |      |       |                      |      |         |                   |       |                  |                      |      |              |                   |       |       |                      |       |         |                   |              |      |                      |       |              |                   |              |       |                      |      |         |                   |     |       |                      |       |         |       |       |       |       |       |              |  |  |  |  |  |
| Negative                                    | 351          | 91.6              | 87   | 89.7  | 0.543                | 123  | 89.2    | 313               | 95.4  | <b>0.038</b>     |                      | 372  | 91.6         | 66                | 89.7  | 0.495 | 343                  | 90.0  | 93      | 93.9              | 0.229        |      | 359                  | 91.1  | 79           | 91.9              | 0.825        | 347   | 90.1                 | 89   | 93.7    | 0.282             | 372 | 91.9  | 66                   | 88.0  | 0.278   | 347   | 90.1  | 89    | 93.7  | 0.282 |              |  |  |  |  |  |
| Positive                                    | 32           | 8.4               | 10   | 10.3  |                      | 6    | 10.8    | 38                | 4.7   |                  | 34                   | 8.4  | 8            | 10.3              |       | 38    | 10.0                 | 6     | 6.1     |                   | 35           | 8.9  | 7                    | 8.1   |              | 38                | 9.9          | 6     | 6.3                  |      | 38      | 9.9               | 9   | 12.0  |                      | 38    | 9.9     | 6     | 6.3   |       |       |       |              |  |  |  |  |  |
| <b>Partner's HIV status</b>                 |              |                   |      |       |                      |      |         |                   |       |                  |                      |      |              |                   |       |       |                      |       |         |                   |              |      |                      |       |              |                   |              |       |                      |      |         |                   |     |       |                      |       |         |       |       |       |       |       |              |  |  |  |  |  |
| Negative                                    | 308          | 80.4              | 78   | 80.4  | 0.834                | 107  | 75.8    | 266               | 83.0  | 0.163            |                      | 326  | 80.3         | 60                | 81.1  | 0.509 | 289                  | 75.9  | 84      | 84.9              | 0.122        |      | 313                  | 79.4  | 73           | 84.9              | 0.225        | 295   | 76.6                 | 78   | 82.1    | 0.431             | 324 | 80.0  | 62                   | 82.7  | 0.646   | 298   | 76.6  | 78    | 82.1  | 0.431 |              |  |  |  |  |  |
| Positive                                    | 26           | 6.8               | 8    | 8.3   |                      | 6    | 9.4     | 33                | 4.7   |                  | 27                   | 6.7  | 7            | 9.5               |       | 35    | 9.2                  | 4     | 4.0     |                   | 27           | 6.9  | 7                    | 8.1   |              | 34                | 8.8          | 5     | 5.3                  |      | 28      | 6.9               | 6   | 8.0   |                      | 34    | 8.8     | 5     | 5.3   |       |       |       |              |  |  |  |  |  |
| Don't know                                  | 49           | 12.8              | 11   | 11.3  |                      | 16   | 14.8    | 52                | 12.4  |                  | 53                   | 13.1 | 7            | 9.5               |       | 57    | 15.0                 | 11    | 11.1    |                   | 54           | 13.7 | 6                    | 7.0   |              | 56                | 14.6         | 12    | 12.6                 |      | 53      | 13.1              | 7   | 8.3   |                      | 56    | 14.6    | 12    | 12.6  |       |       |       |              |  |  |  |  |  |
| <b>Disclosure of HIV status</b>             |              |                   |      |       |                      |      |         |                   |       |                  |                      |      |              |                   |       |       |                      |       |         |                   |              |      |                      |       |              |                   |              |       |                      |      |         |                   |     |       |                      |       |         |       |       |       |       |       |              |  |  |  |  |  |
| No                                          | 18           | 4.7               | 3    | 3.1   | 0.489                | 4    | 4.3     | 15                | 3.1   | 0.559            |                      | 19   | 4.7          | 2                 | 2.7   | 0.444 | 17                   | 4.5   | 2       | 2.0               | 0.267        |      | 18                   | 4.6   | 3            | 3.5               | 0.657        | 16    | 4.2                  | 3    | 3.2     | 0.655             | 20  | 4.9   | 1                    | 1.3   | 0.161   | 15    | 3.9   | 4     | 4.2   | 0.888 |              |  |  |  |  |  |
| Yes                                         | 365          | 95.3              | 94   | 96.9  |                      | 125  | 95.7    | 336               | 96.9  |                  | 387                  | 95.3 | 72           | 97.3              |       | 364   | 95.5                 | 97    | 98.0    |                   | 376          | 95.4 | 83                   | 96.5  |              | 369               | 95.8         | 92    | 96.8                 |      | 385     | 95.1              | 74  | 98.7  |                      | 370   | 96.1    | 91    | 95.8  |       |       |       |              |  |  |  |  |  |
| <b>HIV/STI risk perception</b>              |              |                   |      |       |                      |      |         |                   |       |                  |                      |      |              |                   |       |       |                      |       |         |                   |              |      |                      |       |              |                   |              |       |                      |      |         |                   |     |       |                      |       |         |       |       |       |       |       |              |  |  |  |  |  |
| No risk at all                              | 47           | 12.3              | 15   | 15.5  | 0.748                | 20   | 19.1    | 67                | 15.5  | 0.789            |                      | 47   | 11.6         | 15                | 20.3  | 0.193 | 71                   | 18.6  | 16      | 16.2              | 0.922        |      | 43                   | 10.9  | 19           | 22.1              | <b>0.044</b> | 70    | 18.2                 | 17   | 17.9    | 0.949             | 48  | 11.9  | 14                   | 18.7  | 0.395   | 70    | 18.2  | 17    | 17.9  | 0.999 |              |  |  |  |  |  |
| Small                                       | 140          | 36.6              | 37   | 38.1  |                      | 48   | 37.0    | 130               | 37.2  |                  | 154                  | 37.9 | 23           | 31.1              |       | 142   | 37.3                 | 36    | 36.4    |                   | 148          | 37.6 | 29                   | 33.7  |              | 145               | 37.7         | 33    | 34.7                 |      | 149     | 36.8              | 28  | 37.3  |                      | 143   | 37.1    | 35    | 36.8  |       |       |       |              |  |  |  |  |  |
| Moderate                                    | 112          | 29.2              | 24   | 24.7  |                      | 34   | 25.6    | 90                | 26.4  |                  | 117                  | 28.8 | 19           | 25.7              |       | 97    | 25.5                 | 27    | 27.3    |                   | 116          | 29.4 | 20                   | 23.3  |              | 98                | 25.5         | 26    | 27.4                 |      | 117     | 28.9              | 19  | 25.3  |                      | 99    | 25.7    | 25    | 26.3  |       |       |       |              |  |  |  |  |  |
| Great                                       | 84           | 21.9              | 21   | 21.7  |                      | 27   | 18.2    | 64                | 20.9  |                  | 88                   | 21.7 | 17           | 23.0              |       | 71    | 18.6                 | 20    | 20.2    |                   | 87           | 22.1 | 18                   | 20.9  |              | 72                | 18.7         | 19    | 20.0                 |      | 91      | 22.5              | 14  | 18.7  |                      | 73    | 19.0    | 18    | 19.0  |       |       |       |              |  |  |  |  |  |
| <b>3) HEC use</b>                           |              |                   |      |       |                      |      |         |                   |       |                  |                      |      |              |                   |       |       |                      |       |         |                   |              |      |                      |       |              |                   |              |       |                      |      |         |                   |     |       |                      |       |         |       |       |       |       |       |              |  |  |  |  |  |
| <b>Type of HECs</b>                         |              |                   |      |       |                      |      |         |                   |       |                  |                      |      |              |                   |       |       |                      |       |         |                   |              |      |                      |       |              |                   |              |       |                      |      |         |                   |     |       |                      |       |         |       |       |       |       |       |              |  |  |  |  |  |
| Injectables                                 | 198          | 51.7              | 54   | 55.7  | 0.901                | 178  | 50.7    | 68                | 52.7  | 0.910            |                      | 207  | 51.0         | 45                | 60.8  | 0.478 | 190                  | 49.9  | 56      | 56.6              | 0.673        |      | 193                  | 49.0  | 59           | 68.6              | <b>0.010</b> | 190</ |                      |      |         |                   |     |       |                      |       |         |       |       |       |       |       |              |  |  |  |  |  |

**Table S3.** Effects of intervention on dual-method contraceptive use at last sexual intercourse among women at 2 months after enrollement

| Variables                                    | Model 1              |          |         | Model 2              |          |         | Model 3              |          |                 |
|----------------------------------------------|----------------------|----------|---------|----------------------|----------|---------|----------------------|----------|-----------------|
|                                              | OR                   | (95% CI) | p-value | AOR <sup>a</sup>     | (95% CI) | p-value | AOR <sup>b</sup>     | (95% CI) | p-value         |
| <b>Intervention</b>                          |                      |          |         |                      |          |         |                      |          |                 |
| Control                                      | Ref.                 |          |         | Ref.                 |          |         | Ref.                 |          |                 |
| Intervention                                 | 4.62 ( 3.18 - 6.71 ) |          | <0.001  | 1.17 ( 0.46 - 2.98 ) |          | 0.745   | 1.19 ( 0.48 - 2.95 ) |          | 0.712           |
| <b>Time</b>                                  |                      |          |         |                      |          |         |                      |          |                 |
| Intervention*time <sup>c</sup>               |                      |          |         | 2.76 ( 1.63 - 4.67 ) |          | <0.001  | 2.89 ( 1.70 - 4.89 ) |          | <0.001          |
|                                              |                      |          |         | 4.29 ( 2.12 - 8.69 ) |          | <0.001  | 4.12 ( 2.02 - 8.39 ) |          | <0.001          |
| <b>1) Socio-demographic characteristics</b>  |                      |          |         |                      |          |         |                      |          |                 |
| <b>Age in years</b>                          |                      |          |         |                      |          |         |                      |          |                 |
| Education                                    |                      |          |         |                      |          |         | 1.00 ( 0.96 - 1.04 ) |          | 0.958           |
| Never                                        |                      |          |         |                      |          |         | Ref.                 |          |                 |
| Primary and more                             |                      |          |         |                      |          |         | 0.98 ( 0.66 - 1.47 ) |          | 0.935           |
| <b>Religion</b>                              |                      |          |         |                      |          |         |                      |          |                 |
| Christian                                    |                      |          |         |                      |          |         | Ref.                 |          |                 |
| Muslim                                       |                      |          |         |                      |          |         | 1.42 ( 0.78 - 2.58 ) |          | 0.246           |
| <b>Wealth index</b>                          |                      |          |         |                      |          |         |                      |          |                 |
| Poor                                         |                      |          |         |                      |          |         | Ref.                 |          |                 |
| Middle                                       |                      |          |         |                      |          |         | 1.35 ( 0.89 - 2.05 ) |          | 0.164           |
| Rich                                         |                      |          |         |                      |          |         | 1.31 ( 0.84 - 2.05 ) |          | 0.240           |
| <b>No. of children</b>                       |                      |          |         |                      |          |         |                      |          |                 |
| Pregnancy intention                          |                      |          |         |                      |          |         | 0.87 ( 0.75 - 1.00 ) |          | 0.057           |
| No                                           |                      |          |         |                      |          |         | Ref.                 |          |                 |
| Yes                                          |                      |          |         |                      |          |         | 1.17 ( 0.66 - 2.09 ) |          | 0.592           |
| Don't know                                   |                      |          |         |                      |          |         | 1.54 ( 0.71 - 3.34 ) |          | 0.274           |
| <b>Partner's pregnancy intention</b>         |                      |          |         |                      |          |         |                      |          |                 |
| No                                           |                      |          |         |                      |          |         | Ref.                 |          |                 |
| Yes                                          |                      |          |         |                      |          |         | 0.45 ( 0.24 - 0.85 ) |          | 0.013           |
| Don't know                                   |                      |          |         |                      |          |         | 0.49 ( 0.25 - 0.96 ) |          | 0.038           |
| <b>History of unintended pregnancy</b>       |                      |          |         |                      |          |         |                      |          |                 |
| No                                           |                      |          |         |                      |          |         | Ref.                 |          |                 |
| Yes                                          |                      |          |         |                      |          |         | 0.93 ( 0.64 - 1.34 ) |          | 0.680           |
| <b>Multiple sex partners</b>                 |                      |          |         |                      |          |         |                      |          |                 |
| No                                           |                      |          |         |                      |          |         | Ref.                 |          |                 |
| Yes                                          |                      |          |         |                      |          |         | 3.50 ( 1.85 - 6.62 ) |          | <0.001          |
| <b>2) HIV-related characteristics</b>        |                      |          |         |                      |          |         |                      |          |                 |
| <b>HIV status</b>                            |                      |          |         |                      |          |         |                      |          |                 |
| Negative                                     |                      |          |         |                      |          |         | Ref.                 |          |                 |
| Positive                                     |                      |          |         |                      |          |         | 1.57 ( 0.71 - 3.49 ) |          | 0.267           |
| <b>Partner's HIV status</b>                  |                      |          |         |                      |          |         |                      |          |                 |
| Negative                                     |                      |          |         |                      |          |         | Ref.                 |          |                 |
| Positive                                     |                      |          |         |                      |          |         | 1.27 ( 0.54 - 2.99 ) |          | 0.583           |
| Don't know                                   |                      |          |         |                      |          |         | 0.95 ( 0.57 - 1.58 ) |          | 0.837           |
| <b>HIV/STI risk perception</b>               |                      |          |         |                      |          |         |                      |          |                 |
| No risk at all                               |                      |          |         |                      |          |         | Ref.                 |          |                 |
| Small                                        |                      |          |         |                      |          |         | 0.80 ( 0.47 - 1.37 ) |          | 0.421           |
| Moderate                                     |                      |          |         |                      |          |         | 1.05 ( 0.60 - 1.83 ) |          | 0.858           |
| Great                                        |                      |          |         |                      |          |         | 1.18 ( 0.65 - 2.15 ) |          | 0.588           |
| <b>3) HEC use</b>                            |                      |          |         |                      |          |         |                      |          |                 |
| <b>Type of HECs</b>                          |                      |          |         |                      |          |         |                      |          |                 |
| Injectables                                  |                      |          |         |                      |          |         | Ref.                 |          |                 |
| Implants                                     |                      |          |         |                      |          |         | 0.94 ( 0.65 - 1.35 ) |          | 0.726           |
| IUDs                                         |                      |          |         |                      |          |         | 1.21 ( 0.69 - 2.12 ) |          | 0.505           |
| OCPs                                         |                      |          |         |                      |          |         | 0.83 ( 0.40 - 1.72 ) |          | 0.611           |
| Female sterilization                         |                      |          |         |                      |          |         |                      |          | Perfect success |
| <b>4) Other psychosocial characteristics</b> |                      |          |         |                      |          |         |                      |          |                 |
| <b>HIV-related knowledge (HIV-KQ-18)</b>     |                      |          |         |                      |          |         |                      |          |                 |
|                                              |                      |          |         |                      |          |         | 1.03 ( 0.97 - 1.11 ) |          | 0.338           |
| <b>Condom use self-efficacy scale</b>        |                      |          |         |                      |          |         |                      |          |                 |
|                                              |                      |          |         |                      |          |         | 1.02 ( 1.00 - 1.05 ) |          | 0.035           |
| <b>Sexual Relationship Power Scale</b>       |                      |          |         |                      |          |         |                      |          |                 |
| Low                                          |                      |          |         |                      |          |         | Ref.                 |          |                 |
| Medium                                       |                      |          |         |                      |          |         | 1.13 ( 0.76 - 1.69 ) |          | 0.551           |
| High                                         |                      |          |         |                      |          |         | 1.07 ( 0.70 - 1.66 ) |          | 0.748           |

OR: odds ratio; AOR: adjusted odds ratio; SD: standard deviation; HEC: highly effective contraceptive; IUD: intrauterine device; OCP: oral contraceptive pill

a. Adjusted for the cluster effect and individuals

b. Adjusted for age, education, religion, wealth index, number of children, pregnancy intention, partner's pregnancy intention, history of unintended pregnancy, multiple sex partnership, HIV status, partner's HIV status, HIV/STI risk perception, HIV-related knowledge, condom use self-efficacy, and sexual relationship control power.

c. Intervention\*time represents the status of the intervention group at follow-up in comparison with the control group at baseline.

**Table S4.** Effects of intervention on dual-method contraceptive use at last sexual intercourse among women at 4 months after enrollement

| Variables                                    | Model 1              |          |         | Model 2              |          |         | Model 3               |          |         |
|----------------------------------------------|----------------------|----------|---------|----------------------|----------|---------|-----------------------|----------|---------|
|                                              | OR                   | (95% CI) | p-value | AOR <sup>a</sup>     | (95% CI) | p-value | AOR <sup>b</sup>      | (95% CI) | p-value |
| <b>Intervention</b>                          |                      |          |         |                      |          |         |                       |          |         |
| Control                                      | Ref.                 |          |         | Ref.                 |          |         | Ref.                  |          |         |
| Intervention                                 | 2.13 ( 1.49 - 3.06 ) |          | <0.001  | 1.62 ( 0.81 - 3.26 ) |          | 0.176   | 1.66 ( 0.87 - 3.16 )  |          | 0.121   |
| <b>Time</b>                                  |                      |          |         | 3.55 ( 2.07 - 6.08 ) |          | <0.001  | 3.55 ( 2.08 - 6.08 )  |          | <0.001  |
| <b>Intervention*time<sup>c</sup></b>         |                      |          |         | 1.66 ( 0.84 - 3.30 ) |          | 0.148   | 1.66 ( 0.84 - 3.30 )  |          | 0.146   |
| <b>1) Socio-demographic characteristics</b>  |                      |          |         |                      |          |         |                       |          |         |
| <b>Age in years</b>                          |                      |          |         |                      |          |         | 0.99 ( 0.95 - 1.03 )  |          | 0.530   |
| <b>Education</b>                             |                      |          |         |                      |          |         |                       |          |         |
| Never                                        |                      |          |         |                      |          |         | Ref.                  |          |         |
| Primary and more                             |                      |          |         |                      |          |         | 0.79 ( 0.51 - 1.22 )  |          | 0.278   |
| <b>Religion</b>                              |                      |          |         |                      |          |         |                       |          |         |
| Christian                                    |                      |          |         |                      |          |         | Ref.                  |          |         |
| Muslim                                       |                      |          |         |                      |          |         | 1.28 ( 0.66 - 2.49 )  |          | 0.465   |
| <b>Wealth index</b>                          |                      |          |         |                      |          |         |                       |          |         |
| Poor                                         |                      |          |         |                      |          |         | Ref.                  |          |         |
| Middle                                       |                      |          |         |                      |          |         | 1.12 ( 0.71 - 1.76 )  |          | 0.624   |
| Rich                                         |                      |          |         |                      |          |         | 1.14 ( 0.70 - 1.85 )  |          | 0.608   |
| <b>No. of children</b>                       |                      |          |         |                      |          |         | 0.92 ( 0.78 - 1.08 )  |          | 0.314   |
| <b>Pregnancy intention</b>                   |                      |          |         |                      |          |         |                       |          |         |
| No                                           |                      |          |         |                      |          |         | Ref.                  |          |         |
| Yes                                          |                      |          |         |                      |          |         | 0.75 ( 0.40 - 1.42 )  |          | 0.376   |
| Don't know                                   |                      |          |         |                      |          |         | 1.17 ( 0.51 - 2.66 )  |          | 0.715   |
| <b>Partner's pregnancy intention</b>         |                      |          |         |                      |          |         |                       |          |         |
| No                                           |                      |          |         |                      |          |         | Ref.                  |          |         |
| Yes                                          |                      |          |         |                      |          |         | 0.55 ( 0.28 - 1.09 )  |          | 0.085   |
| Don't know                                   |                      |          |         |                      |          |         | 0.55 ( 0.26 - 1.15 )  |          | 0.113   |
| <b>History of unintended pregnancy</b>       |                      |          |         |                      |          |         |                       |          |         |
| No                                           |                      |          |         |                      |          |         | Ref.                  |          |         |
| Yes                                          |                      |          |         |                      |          |         | 0.62 ( 0.40 - 0.94 )  |          | 0.026   |
| <b>Multiple sex partners</b>                 |                      |          |         |                      |          |         |                       |          |         |
| No                                           |                      |          |         |                      |          |         | Ref.                  |          |         |
| Yes                                          |                      |          |         |                      |          |         | 2.87 ( 1.45 - 5.67 )  |          | 0.002   |
| <b>2) HIV-related characteristics</b>        |                      |          |         |                      |          |         |                       |          |         |
| <b>HIV status</b>                            |                      |          |         |                      |          |         |                       |          |         |
| Negative                                     |                      |          |         |                      |          |         | Ref.                  |          |         |
| Positive                                     |                      |          |         |                      |          |         | 1.61 ( 0.69 - 3.80 )  |          | 0.273   |
| <b>Partner's HIV status</b>                  |                      |          |         |                      |          |         |                       |          |         |
| Negative                                     |                      |          |         |                      |          |         | Ref.                  |          |         |
| Positive                                     |                      |          |         |                      |          |         | 1.40 ( 0.55 - 3.52 )  |          | 0.480   |
| Don't know                                   |                      |          |         |                      |          |         | 1.26 ( 0.74 - 2.15 )  |          | 0.389   |
| <b>HIV/STI risk perception</b>               |                      |          |         |                      |          |         |                       |          |         |
| No risk at all                               |                      |          |         |                      |          |         | Ref.                  |          |         |
| Small                                        |                      |          |         |                      |          |         | 0.84 ( 0.47 - 1.49 )  |          | 0.544   |
| Moderate                                     |                      |          |         |                      |          |         | 1.01 ( 0.56 - 1.83 )  |          | 0.975   |
| Great                                        |                      |          |         |                      |          |         | 0.96 ( 0.50 - 1.84 )  |          | 0.894   |
| <b>3) HEC use</b>                            |                      |          |         |                      |          |         |                       |          |         |
| <b>Type of HECs</b>                          |                      |          |         |                      |          |         |                       |          |         |
| Injectables                                  |                      |          |         |                      |          |         | Ref.                  |          |         |
| Implants                                     |                      |          |         |                      |          |         | 0.94 ( 0.62 - 1.44 )  |          | 0.788   |
| IUDs                                         |                      |          |         |                      |          |         | 1.18 ( 0.63 - 2.21 )  |          | 0.603   |
| OCPs                                         |                      |          |         |                      |          |         | 2.35 ( 1.17 - 4.74 )  |          | 0.017   |
| Female sterilization                         |                      |          |         |                      |          |         | 0.97 ( 0.05 - 19.29 ) |          | 0.986   |
| <b>4) Other psychosocial characteristics</b> |                      |          |         |                      |          |         |                       |          |         |
| <b>HIV-related knowledge (HIV-KQ-18)</b>     |                      |          |         |                      |          |         | 1.01 ( 0.94 - 1.08 )  |          | 0.858   |
| <b>Condom use self-efficacy scale</b>        |                      |          |         |                      |          |         | 1.04 ( 1.01 - 1.06 )  |          | 0.002   |
| <b>Sexual Relationship Power Scale</b>       |                      |          |         |                      |          |         |                       |          |         |
| Low                                          |                      |          |         |                      |          |         | Ref.                  |          |         |
| Medium                                       |                      |          |         |                      |          |         | 1.44 ( 0.91 - 2.27 )  |          | 0.119   |
| High                                         |                      |          |         |                      |          |         | 1.21 ( 0.74 - 1.98 )  |          | 0.443   |

OR: odds ratio; AOR: adjusted odds ratio; SD: standard deviation; HEC: highly effective contraceptive; IUD: intrauterine device; OCP: oral contraceptive pill

a. Adjusted for the cluster effect and individuals

b. Adjusted for age, education, religion, wealth index, number of children, pregnancy intention, partner's pregnancy intention, history of unintended pregnancy, multiple sex partnership, HIV status, partner's HIV status, HIV/STI risk perception, HIV-related knowledge, condom use self-efficacy, and sexual relationship control power.

c. Intervention\*time represents the status of the intervention group at follow-up in comparison with the control group at baseline.

**Table S5.** Effects of intervention on dual-method contraceptive use at last sexual intercourse among women at 6 months after enrollement

| Variables                                    | Model 1              |          |         | Model 2              |          |              | Model 3                     |          |                 |
|----------------------------------------------|----------------------|----------|---------|----------------------|----------|--------------|-----------------------------|----------|-----------------|
|                                              | OR                   | (95% CI) | p-value | AOR <sup>a</sup>     | (95% CI) | p-value      | AOR <sup>b</sup>            | (95% CI) | p-value         |
| <b>Intervention</b>                          |                      |          |         |                      |          |              |                             |          |                 |
| Control                                      | Ref.                 |          |         | Ref.                 |          |              | Ref.                        |          |                 |
| Intervention                                 | 2.53 ( 1.69 - 3.79 ) |          | <0.001  | 1.42 ( 0.55 - 3.67 ) |          | 0.465        | 1.40 ( 0.53 - 3.67 )        |          | 0.494           |
| <b>Time</b>                                  |                      |          |         | 2.16 ( 1.24 - 3.75 ) |          | <b>0.006</b> | 2.17 ( 1.25 - 3.76 )        |          | <b>0.006</b>    |
| <b>Intervention*time<sup>c</sup></b>         |                      |          |         | 2.04 ( 1.00 - 4.17 ) |          | 0.051        | 2.03 ( 0.99 - 4.14 )        |          | 0.052           |
| <b>1) Socio-demographic characteristics</b>  |                      |          |         |                      |          |              |                             |          |                 |
| <b>Age in years</b>                          |                      |          |         |                      |          |              | 0.97 ( 0.93 - 1.02 )        |          | 0.208           |
| <b>Education</b>                             |                      |          |         |                      |          |              |                             |          |                 |
| Never                                        |                      |          |         |                      |          |              | Ref.                        |          |                 |
| Primary and more                             |                      |          |         |                      |          |              | 0.89 ( 0.56 - 1.41 )        |          | 0.618           |
| <b>Religion</b>                              |                      |          |         |                      |          |              |                             |          |                 |
| Christian                                    |                      |          |         |                      |          |              | Ref.                        |          |                 |
| Muslim                                       |                      |          |         |                      |          |              | 1.36 ( 0.70 - 2.65 )        |          | 0.366           |
| <b>Wealth index</b>                          |                      |          |         |                      |          |              |                             |          |                 |
| Poor                                         |                      |          |         |                      |          |              | Ref.                        |          |                 |
| Middle                                       |                      |          |         |                      |          |              | 0.96 ( 0.60 - 1.55 )        |          | 0.875           |
| Rich                                         |                      |          |         |                      |          |              | 0.75 ( 0.45 - 1.27 )        |          | 0.283           |
| <b>No. of children</b>                       |                      |          |         |                      |          |              | 1.02 ( 0.86 - 1.20 )        |          | 0.853           |
| <b>Pregnancy intention</b>                   |                      |          |         |                      |          |              |                             |          |                 |
| No                                           |                      |          |         |                      |          |              | Ref.                        |          |                 |
| Yes                                          |                      |          |         |                      |          |              | 0.84 ( 0.44 - 1.61 )        |          | 0.602           |
| Don't know                                   |                      |          |         |                      |          |              | 1.29 ( 0.55 - 3.03 )        |          | 0.565           |
| <b>Partner's pregnancy intention</b>         |                      |          |         |                      |          |              |                             |          |                 |
| No                                           |                      |          |         |                      |          |              | Ref.                        |          |                 |
| Yes                                          |                      |          |         |                      |          |              | 0.69 ( 0.34 - 1.41 )        |          | 0.307           |
| Don't know                                   |                      |          |         |                      |          |              | 0.62 ( 0.29 - 1.35 )        |          | 0.228           |
| <b>History of unintended pregnancy</b>       |                      |          |         |                      |          |              |                             |          |                 |
| No                                           |                      |          |         |                      |          |              | Ref.                        |          |                 |
| Yes                                          |                      |          |         |                      |          |              | 0.73 ( 0.48 - 1.13 )        |          | 0.157           |
| <b>Multiple sex partners</b>                 |                      |          |         |                      |          |              |                             |          |                 |
| No                                           |                      |          |         |                      |          |              | Ref.                        |          |                 |
| Yes                                          |                      |          |         |                      |          |              | 2.96 ( 1.50 - 5.85 )        |          | <b>0.002</b>    |
| <b>2) HIV-related characteristics</b>        |                      |          |         |                      |          |              |                             |          |                 |
| <b>HIV status</b>                            |                      |          |         |                      |          |              |                             |          |                 |
| Negative                                     |                      |          |         |                      |          |              | Ref.                        |          |                 |
| Positive                                     |                      |          |         |                      |          |              | 1.24 ( 0.52 - 2.97 )        |          | 0.629           |
| <b>Partner's HIV status</b>                  |                      |          |         |                      |          |              |                             |          |                 |
| Negative                                     |                      |          |         |                      |          |              | Ref.                        |          |                 |
| Positive                                     |                      |          |         |                      |          |              | 1.67 ( 0.64 - 4.31 )        |          | 0.292           |
| Don't know                                   |                      |          |         |                      |          |              | <b>1.09</b> ( 0.62 - 1.92 ) |          | 0.758           |
| <b>HIV/STI risk perception</b>               |                      |          |         |                      |          |              |                             |          |                 |
| No risk at all                               |                      |          |         |                      |          |              | Ref.                        |          |                 |
| Small                                        |                      |          |         |                      |          |              | 0.76 ( 0.41 - 1.40 )        |          | 0.377           |
| Moderate                                     |                      |          |         |                      |          |              | 1.03 ( 0.55 - 1.92 )        |          | 0.937           |
| Great                                        |                      |          |         |                      |          |              | 0.77 ( 0.38 - 1.53 )        |          | 0.452           |
| <b>3) HEC use</b>                            |                      |          |         |                      |          |              |                             |          |                 |
| <b>Type of HECs</b>                          |                      |          |         |                      |          |              |                             |          |                 |
| Injectables                                  |                      |          |         |                      |          |              | Ref.                        |          |                 |
| Implants                                     |                      |          |         |                      |          |              | 0.92 ( 0.60 - 1.42 )        |          | 0.715           |
| IUDs                                         |                      |          |         |                      |          |              | 1.19 ( 0.63 - 2.25 )        |          | 0.589           |
| OCPs                                         |                      |          |         |                      |          |              | 2.03 ( 0.99 - 4.17 )        |          | 0.054           |
| Female sterilization                         |                      |          |         |                      |          |              |                             |          | Perfect success |
| <b>4) Other psychosocial characteristics</b> |                      |          |         |                      |          |              |                             |          |                 |
| <b>HIV-related knowledge (HIV-KQ-18)</b>     |                      |          |         |                      |          |              | 1.05 ( 0.97 - 1.13 )        |          | 0.226           |
| <b>Condom use self-efficacy scale</b>        |                      |          |         |                      |          |              | 1.04 ( 1.01 - 1.06 )        |          | <b>0.006</b>    |
| <b>Sexual Relationship Power Scale</b>       |                      |          |         |                      |          |              |                             |          |                 |
| Low                                          |                      |          |         |                      |          |              | Ref.                        |          |                 |
| Medium                                       |                      |          |         |                      |          |              | 1.59 ( 0.99 - 2.54 )        |          | 0.056           |
| High                                         |                      |          |         |                      |          |              | 1.19 ( 0.71 - 1.97 )        |          | 0.513           |

OR: odds ratio; AOR: adjusted odds ratio; SD: standard deviation; HEC: highly effective contraceptive; IUD: intrauterine device; OCP: oral contraceptive pill

a. Adjusted for the cluster effect and individuals

b. Adjusted for age, education, religion, wealth index, number of children, pregnancy intention, partner's pregnancy intention, history of unintended pregnancy, multiple sex partnership, HIV status, partner's HIV status, HIV/STI risk perception, HIV-related knowledge, condom use self-efficacy, and sexual relationship control power.

c. Intervention\*time represents the status of the intervention group at follow-up in comparison with the control group at baseline.



**Table S6.** Effects of intervention on dual-method contraceptive use at last sexual intercourse among women at 8 months after enrollement

| Variables                                    | Model 1              |          |         | Model 2              |          |              | Model 3              |          |                 |
|----------------------------------------------|----------------------|----------|---------|----------------------|----------|--------------|----------------------|----------|-----------------|
|                                              | OR                   | (95% CI) | p-value | AOR <sup>a</sup>     | (95% CI) | p-value      | AOR <sup>b</sup>     | (95% CI) | p-value         |
| <b>Intervention</b>                          |                      |          |         |                      |          |              |                      |          |                 |
| Control                                      | Ref.                 |          |         | Ref.                 |          |              | Ref.                 |          |                 |
| Intervention                                 | 2.76 ( 1.79 - 4.26 ) |          | <0.001  | 1.41 ( 0.58 - 3.40 ) |          | 0.450        | 1.39 ( 0.59 - 3.31 ) |          | 0.452           |
| <b>Time</b>                                  |                      |          |         |                      |          |              |                      |          |                 |
| Intervention*time <sup>c</sup>               |                      |          |         | 1.59 ( 0.91 - 2.76 ) |          | 0.101        | 1.60 ( 0.92 - 2.77 ) |          | 0.094           |
|                                              |                      |          |         | 2.19 ( 1.07 - 4.48 ) |          | <b>0.032</b> | 2.16 ( 1.06 - 4.41 ) |          | <b>0.034</b>    |
| <b>1) Socio-demographic characteristics</b>  |                      |          |         |                      |          |              |                      |          |                 |
| <b>Age in years</b>                          |                      |          |         |                      |          |              | 0.97 ( 0.93 - 1.01 ) |          | 0.114           |
| <b>Education</b>                             |                      |          |         |                      |          |              |                      |          |                 |
| Never                                        |                      |          |         |                      |          |              | Ref.                 |          |                 |
| Primary and more                             |                      |          |         |                      |          |              | 1.03 ( 0.66 - 1.62 ) |          | 0.884           |
| <b>Religion</b>                              |                      |          |         |                      |          |              |                      |          |                 |
| Christian                                    |                      |          |         |                      |          |              | Ref.                 |          |                 |
| Muslim                                       |                      |          |         |                      |          |              | 1.13 ( 0.57 - 2.21 ) |          | 0.728           |
| <b>Wealth index</b>                          |                      |          |         |                      |          |              |                      |          |                 |
| Poor                                         |                      |          |         |                      |          |              | Ref.                 |          |                 |
| Middle                                       |                      |          |         |                      |          |              | 1.11 ( 0.71 - 1.75 ) |          | 0.647           |
| Rich                                         |                      |          |         |                      |          |              | 0.89 ( 0.54 - 1.48 ) |          | 0.664           |
| <b>No. of children</b>                       |                      |          |         |                      |          |              | 1.04 ( 0.88 - 1.22 ) |          | 0.676           |
| <b>Pregnancy intention</b>                   |                      |          |         |                      |          |              |                      |          |                 |
| No                                           |                      |          |         |                      |          |              | Ref.                 |          |                 |
| Yes                                          |                      |          |         |                      |          |              | 0.82 ( 0.44 - 1.55 ) |          | 0.550           |
| Don't know                                   |                      |          |         |                      |          |              | 1.66 ( 0.75 - 3.65 ) |          | 0.210           |
| <b>Partner's pregnancy intention</b>         |                      |          |         |                      |          |              |                      |          |                 |
| No                                           |                      |          |         |                      |          |              | Ref.                 |          |                 |
| Yes                                          |                      |          |         |                      |          |              | 0.65 ( 0.33 - 1.28 ) |          | 0.214           |
| Don't know                                   |                      |          |         |                      |          |              | 0.71 ( 0.35 - 1.47 ) |          | 0.359           |
| <b>History of unintended pregnancy</b>       |                      |          |         |                      |          |              |                      |          |                 |
| No                                           |                      |          |         |                      |          |              | Ref.                 |          |                 |
| Yes                                          |                      |          |         |                      |          |              | 0.83 ( 0.55 - 1.25 ) |          | 0.375           |
| <b>Multiple sex partners</b>                 |                      |          |         |                      |          |              |                      |          |                 |
| No                                           |                      |          |         |                      |          |              | Ref.                 |          |                 |
| Yes                                          |                      |          |         |                      |          |              | 3.22 ( 1.69 - 6.12 ) |          | <0.001          |
| <b>2) HIV-related characteristics</b>        |                      |          |         |                      |          |              |                      |          |                 |
| <b>HIV status</b>                            |                      |          |         |                      |          |              |                      |          |                 |
| Negative                                     |                      |          |         |                      |          |              | Ref.                 |          |                 |
| Positive                                     |                      |          |         |                      |          |              | 0.97 ( 0.40 - 2.31 ) |          | 0.938           |
| <b>Partner's HIV status</b>                  |                      |          |         |                      |          |              |                      |          |                 |
| Negative                                     |                      |          |         |                      |          |              | Ref.                 |          |                 |
| Positive                                     |                      |          |         |                      |          |              | 2.04 ( 0.82 - 5.09 ) |          | 0.128           |
| Don't know                                   |                      |          |         |                      |          |              | 1.04 ( 0.60 - 1.81 ) |          | 0.887           |
| <b>HIV/STI risk perception</b>               |                      |          |         |                      |          |              |                      |          |                 |
| No risk at all                               |                      |          |         |                      |          |              | Ref.                 |          |                 |
| Small                                        |                      |          |         |                      |          |              | 0.68 ( 0.39 - 1.20 ) |          | 0.187           |
| Moderate                                     |                      |          |         |                      |          |              | 0.79 ( 0.44 - 1.42 ) |          | 0.437           |
| Great                                        |                      |          |         |                      |          |              | 0.77 ( 0.41 - 1.47 ) |          | 0.429           |
| <b>3) HEC use</b>                            |                      |          |         |                      |          |              |                      |          |                 |
| <b>Type of HECs</b>                          |                      |          |         |                      |          |              |                      |          |                 |
| Injectables                                  |                      |          |         |                      |          |              | Ref.                 |          |                 |
| Implants                                     |                      |          |         |                      |          |              | 0.86 ( 0.56 - 1.31 ) |          | 0.483           |
| IUDs                                         |                      |          |         |                      |          |              | 1.23 ( 0.67 - 2.25 ) |          | 0.511           |
| OCPs                                         |                      |          |         |                      |          |              | 1.36 ( 0.66 - 2.80 ) |          | 0.408           |
| Female sterilization                         |                      |          |         |                      |          |              |                      |          | Perfect success |
| <b>4) Other psychosocial characteristics</b> |                      |          |         |                      |          |              |                      |          |                 |
| <b>HIV-related knowledge (HIV-KQ-18)</b>     |                      |          |         |                      |          |              | 1.04 ( 0.96 - 1.12 ) |          | 0.312           |
| <b>Condom use self-efficacy scale</b>        |                      |          |         |                      |          |              | 1.03 ( 1.00 - 1.05 ) |          | <b>0.029</b>    |
| <b>Sexual Relationship Power Scale</b>       |                      |          |         |                      |          |              |                      |          |                 |
| Low                                          |                      |          |         |                      |          |              | Ref.                 |          |                 |
| Medium                                       |                      |          |         |                      |          |              | 1.29 ( 0.81 - 2.05 ) |          | 0.290           |
| High                                         |                      |          |         |                      |          |              | 1.42 ( 0.87 - 2.31 ) |          | 0.165           |

OR: odds ratio; AOR: adjusted odds ratio; SD: standard deviation; HEC: highly effective contraceptive; IUD: intrauterine device; OCP: oral contraceptive pill

a. Adjusted for the cluster effect and individuals

b. Adjusted for age, education, religion, wealth index, number of children, pregnancy intention, partner's pregnancy intention, history of unintended pregnancy, multiple sex partnership, HIV status, partner's HIV status, HIV/STI risk perception, HIV-related knowledge, condom use self-efficacy, and sexual relationship control power.

c. Intervention\*time represents the status of the intervention group at follow-up in comparison with the control group at baseline.

**Table S7.** Effects of intervention on consistent dual-method contraceptive use among women at 2 months after enrollement

| Variables                                   | Model 1                |          |         | Model 2                |          |         | Model 3                |          |                 |
|---------------------------------------------|------------------------|----------|---------|------------------------|----------|---------|------------------------|----------|-----------------|
|                                             | OR                     | (95% CI) | p-value | AOR <sup>a</sup>       | (95% CI) | p-value | AOR <sup>b</sup>       | (95% CI) | p-value         |
| <b>Intervention</b>                         |                        |          |         |                        |          |         |                        |          |                 |
| Control                                     | Ref.                   |          |         | Ref.                   |          |         | Ref.                   |          |                 |
| Intervention                                | 11.98 ( 4.74 - 30.29 ) |          | <0.001  | 13.71 ( 3.59 - 52.43 ) |          | <0.001  | 14.53 ( 3.63 - 58.13 ) |          | <0.001          |
| <b>1) Socio-demographic characteristics</b> |                        |          |         |                        |          |         |                        |          |                 |
| <b>Age in years</b>                         |                        |          |         |                        |          |         | 1.01 ( 0.94 - 1.08 )   |          | 0.856           |
| <b>Education</b>                            |                        |          |         |                        |          |         |                        |          |                 |
| Never                                       |                        |          |         |                        |          |         | Ref.                   |          |                 |
| Primary and more                            |                        |          |         |                        |          |         | 0.69 ( 0.34 - 1.39 )   |          | 0.298           |
| <b>Religion</b>                             |                        |          |         |                        |          |         |                        |          |                 |
| Christian                                   |                        |          |         |                        |          |         | Ref.                   |          |                 |
| Muslim                                      |                        |          |         |                        |          |         | 0.93 ( 0.30 - 2.85 )   |          | 0.898           |
| <b>Wealth index</b>                         |                        |          |         |                        |          |         |                        |          |                 |
| Poor                                        |                        |          |         |                        |          |         | Ref.                   |          |                 |
| Middle                                      |                        |          |         |                        |          |         | 1.47 ( 0.70 - 3.11 )   |          | 0.307           |
| Rich                                        |                        |          |         |                        |          |         | 1.37 ( 0.61 - 3.09 )   |          | 0.441           |
| <b>No. of children</b>                      |                        |          |         |                        |          |         | 0.89 ( 0.69 - 1.16 )   |          | 0.396           |
| <b>Pregnancy intention</b>                  |                        |          |         |                        |          |         |                        |          |                 |
| No                                          |                        |          |         |                        |          |         | Ref.                   |          |                 |
| Yes                                         |                        |          |         |                        |          |         | 0.56 ( 0.20 - 1.54 )   |          | 0.264           |
| Don't know                                  |                        |          |         |                        |          |         | 1.51 ( 0.39 - 5.84 )   |          | 0.551           |
| <b>Partner's pregnancy intention</b>        |                        |          |         |                        |          |         |                        |          |                 |
| No                                          |                        |          |         |                        |          |         | Ref.                   |          |                 |
| Yes                                         |                        |          |         |                        |          |         | 0.89 ( 0.30 - 2.64 )   |          | 0.834           |
| Don't know                                  |                        |          |         |                        |          |         | 0.59 ( 0.17 - 2.05 )   |          | 0.405           |
| <b>History of unintended pregnancy</b>      |                        |          |         |                        |          |         |                        |          |                 |
| No                                          |                        |          |         |                        |          |         | Ref.                   |          |                 |
| Yes                                         |                        |          |         |                        |          |         | 0.76 ( 0.39 - 1.48 )   |          | 0.421           |
| <b>Multiple sex partners</b>                |                        |          |         |                        |          |         |                        |          |                 |
| No                                          |                        |          |         |                        |          |         | Ref.                   |          |                 |
| Yes                                         |                        |          |         |                        |          |         | 3.21 ( 1.06 - 9.67 )   |          | 0.039           |
| <b>2) HIV-related characteristics</b>       |                        |          |         |                        |          |         |                        |          |                 |
| <b>HIV status</b>                           |                        |          |         |                        |          |         |                        |          |                 |
| Negative                                    |                        |          |         |                        |          |         | Ref.                   |          |                 |
| Positive                                    |                        |          |         |                        |          |         | 1.47 ( 0.39 - 5.52 )   |          | 0.566           |
| <b>Partner's HIV status</b>                 |                        |          |         |                        |          |         |                        |          |                 |
| Negative                                    |                        |          |         |                        |          |         | Ref.                   |          |                 |
| Positive                                    |                        |          |         |                        |          |         | 1.23 ( 0.28 - 5.43 )   |          | 0.785           |
| Don't know                                  |                        |          |         |                        |          |         | 1.15 ( 0.48 - 2.77 )   |          | 0.747           |
| <b>HIV/STI risk perception</b>              |                        |          |         |                        |          |         |                        |          |                 |
| No risk at all                              |                        |          |         |                        |          |         | Ref.                   |          |                 |
| Small                                       |                        |          |         |                        |          |         | 1.98 ( 0.57 - 6.91 )   |          | 0.283           |
| Moderate                                    |                        |          |         |                        |          |         | 2.37 ( 0.67 - 8.43 )   |          | 0.181           |
| Great                                       |                        |          |         |                        |          |         | 4.04 ( 1.10 - 14.82 )  |          | 0.035           |
| <b>3) HEC use</b>                           |                        |          |         |                        |          |         |                        |          |                 |
| <b>Type of HECs</b>                         |                        |          |         |                        |          |         |                        |          |                 |
| Injectables                                 |                        |          |         |                        |          |         | Ref.                   |          |                 |
| Implants                                    |                        |          |         |                        |          |         | 0.53 ( 0.27 - 1.04 )   |          | 0.064           |
| IUDs                                        |                        |          |         |                        |          |         | 0.47 ( 0.14 - 1.57 )   |          | 0.219           |
| OCPs                                        |                        |          |         |                        |          |         | 0.16 ( 0.02 - 1.37 )   |          | 0.093           |
| Female sterilization                        |                        |          |         |                        |          |         |                        |          | Perfect success |
| <b>4) Other psychosocial charactericts</b>  |                        |          |         |                        |          |         |                        |          |                 |
| <b>HIV-related knowledge (HIV-KQ-18)</b>    |                        |          |         |                        |          |         | 1.02 ( 0.90 - 1.16 )   |          | 0.722           |
| <b>Condom use self-efficacy scale</b>       |                        |          |         |                        |          |         | 0.98 ( 0.94 - 1.02 )   |          | 0.359           |
| <b>Sexual Relationship Power Scale</b>      |                        |          |         |                        |          |         |                        |          |                 |
| Low                                         |                        |          |         |                        |          |         | Ref.                   |          |                 |
| Medium                                      |                        |          |         |                        |          |         | 1.36 ( 0.62 - 2.95 )   |          | 0.445           |
| High                                        |                        |          |         |                        |          |         | 1.87 ( 0.84 - 4.17 )   |          | 0.124           |

OR: odds ratio; AOR: adjusted odds ratio; SD: standard deviation; HEC: highly effective contraceptive; IUD: intrauterine device; OCP: oral contraceptive pill

a. Adjusted for the cluster effect and individuals

b. Adjusted for age, education, religion, wealth index, number of children, pregnancy intention, partner's pregnancy intention, history of unintended pregnancy, multiple sex partnership, HIV status, partner's HIV status, HIV/STI risk perception, HIV-related knowledge, condom use self-efficacy, and sexual relationship control power.

**Table S8.** Effects of intervention on consistent dual-method contraceptive use among women at 4 months after enrollement

| Variables                                   | Model 1               |          |         | Model 2               |          |         | Model 3               |          |                 |
|---------------------------------------------|-----------------------|----------|---------|-----------------------|----------|---------|-----------------------|----------|-----------------|
|                                             | OR                    | (95% CI) | p-value | AOR <sup>a</sup>      | (95% CI) | p-value | AOR <sup>b</sup>      | (95% CI) | p-value         |
| <b>Intervention</b>                         |                       |          |         |                       |          |         |                       |          |                 |
| Control                                     | Ref.                  |          |         | Ref.                  |          |         | Ref.                  |          |                 |
| Intervention                                | 5.22 ( 2.42 - 11.28 ) |          | <0.001  | 6.28 ( 2.01 - 19.60 ) |          | 0.002   | 6.30 ( 2.20 - 18.03 ) |          | 0.001           |
| <b>1) Socio-demographic characteristics</b> |                       |          |         |                       |          |         |                       |          |                 |
| <b>Age in years</b>                         |                       |          |         |                       |          |         | 1.05 ( 0.98 - 1.12 )  |          | 0.181           |
| <b>Education</b>                            |                       |          |         |                       |          |         |                       |          |                 |
| Never                                       |                       |          |         |                       |          |         | Ref.                  |          |                 |
| Primary and more                            |                       |          |         |                       |          |         | 0.56 ( 0.28 - 1.13 )  |          | 0.104           |
| <b>Religion</b>                             |                       |          |         |                       |          |         |                       |          |                 |
| Christian                                   |                       |          |         |                       |          |         | Ref.                  |          |                 |
| Muslim                                      |                       |          |         |                       |          |         | 0.73 ( 0.19 - 2.82 )  |          | 0.651           |
| <b>Wealth index</b>                         |                       |          |         |                       |          |         |                       |          |                 |
| Poor                                        |                       |          |         |                       |          |         | Ref.                  |          |                 |
| Middle                                      |                       |          |         |                       |          |         | 1.63 ( 0.74 - 3.56 )  |          | 0.224           |
| Rich                                        |                       |          |         |                       |          |         | 1.51 ( 0.65 - 3.54 )  |          | 0.340           |
| <b>No. of children</b>                      |                       |          |         |                       |          |         | 0.79 ( 0.59 - 1.05 )  |          | 0.104           |
| <b>Pregnancy intention</b>                  |                       |          |         |                       |          |         |                       |          |                 |
| No                                          |                       |          |         |                       |          |         | Ref.                  |          |                 |
| Yes                                         |                       |          |         |                       |          |         | 0.37 ( 0.13 - 1.06 )  |          | 0.063           |
| Don't know                                  |                       |          |         |                       |          |         | 0.61 ( 0.16 - 2.43 )  |          | 0.488           |
| <b>Partner's pregnancy intention</b>        |                       |          |         |                       |          |         |                       |          |                 |
| No                                          |                       |          |         |                       |          |         | Ref.                  |          |                 |
| Yes                                         |                       |          |         |                       |          |         | 1.45 ( 0.47 - 4.49 )  |          | 0.523           |
| Don't know                                  |                       |          |         |                       |          |         | 1.08 ( 0.32 - 3.67 )  |          | 0.907           |
| <b>History of unintended pregnancy</b>      |                       |          |         |                       |          |         |                       |          |                 |
| No                                          |                       |          |         |                       |          |         | Ref.                  |          |                 |
| Yes                                         |                       |          |         |                       |          |         | 0.52 ( 0.24 - 1.12 )  |          | 0.094           |
| <b>Multiple sex partners</b>                |                       |          |         |                       |          |         |                       |          |                 |
| No                                          |                       |          |         |                       |          |         | Ref.                  |          |                 |
| Yes                                         |                       |          |         |                       |          |         | 0.37 ( 0.05 - 3.05 )  |          | 0.356           |
| <b>2) HIV-related characteristics</b>       |                       |          |         |                       |          |         |                       |          |                 |
| <b>HIV status</b>                           |                       |          |         |                       |          |         |                       |          |                 |
| Negative                                    |                       |          |         |                       |          |         | Ref.                  |          |                 |
| Positive                                    |                       |          |         |                       |          |         | 1.01 ( 0.24 - 4.31 )  |          | 0.985           |
| <b>Partner's HIV status</b>                 |                       |          |         |                       |          |         |                       |          |                 |
| Negative                                    |                       |          |         |                       |          |         | Ref.                  |          |                 |
| Positive                                    |                       |          |         |                       |          |         | 1.84 ( 0.36 - 9.30 )  |          | 0.462           |
| Don't know                                  |                       |          |         |                       |          |         | 1.63 ( 0.68 - 3.92 )  |          | 0.275           |
| <b>HIV/STI risk perception</b>              |                       |          |         |                       |          |         |                       |          |                 |
| No risk at all                              |                       |          |         |                       |          |         | Ref.                  |          |                 |
| Small                                       |                       |          |         |                       |          |         | 2.14 ( 0.58 - 7.93 )  |          | 0.253           |
| Moderate                                    |                       |          |         |                       |          |         | 2.15 ( 0.56 - 8.32 )  |          | 0.268           |
| Great                                       |                       |          |         |                       |          |         | 1.65 ( 0.39 - 7.03 )  |          | 0.499           |
| <b>3) HEC use</b>                           |                       |          |         |                       |          |         |                       |          |                 |
| <b>Type of HECs</b>                         |                       |          |         |                       |          |         |                       |          |                 |
| Injectables                                 |                       |          |         |                       |          |         | Ref.                  |          |                 |
| Implants                                    |                       |          |         |                       |          |         | 1.01 ( 0.49 - 2.06 )  |          | 0.987           |
| IUDs                                        |                       |          |         |                       |          |         | 1.58 ( 0.54 - 4.62 )  |          | 0.400           |
| OCPs                                        |                       |          |         |                       |          |         | 0.66 ( 0.13 - 3.32 )  |          | 0.618           |
| Female sterilization                        |                       |          |         |                       |          |         |                       |          | Perfect success |
| <b>4) Other psychosocial charactericts</b>  |                       |          |         |                       |          |         |                       |          |                 |
| <b>HIV-related knowledge (HIV-KQ-18)</b>    |                       |          |         |                       |          |         | 0.92 ( 0.81 - 1.03 )  |          | 0.148           |
| <b>Condom use self-efficacy scale</b>       |                       |          |         |                       |          |         | 1.02 ( 0.97 - 1.06 )  |          | 0.443           |
| <b>Sexual Relationship Power Scale</b>      |                       |          |         |                       |          |         |                       |          |                 |
| Low                                         |                       |          |         |                       |          |         | Ref.                  |          |                 |
| Medium                                      |                       |          |         |                       |          |         | 0.72 ( 0.32 - 1.63 )  |          | 0.434           |
| High                                        |                       |          |         |                       |          |         | 0.96 ( 0.42 - 2.21 )  |          | 0.932           |

OR: odds ratio; AOR: adjusted odds ratio; SD: standard deviation; HEC: highly effective contraceptive; IUD: intrauterine device; OCP: oral contraceptive pill

a. Adjusted for the cluster effect and individuals

b. Adjusted for age, education, religion, wealth index, number of children, pregnancy intention, partner's pregnancy intention, history of unintended pregnancy, multiple sex partnership, HIV status, partner's HIV status, HIV/STI risk perception, HIV-related knowledge, condom use self-efficacy, and sexual relationship control power.

**Table S9.** Effects of intervention on consistent dual-method contraceptive use among women at 6 months after enrollement

| Variables                                   | Model 1               |          |         | Model 2               |          |         | Model 3               |          |                 |
|---------------------------------------------|-----------------------|----------|---------|-----------------------|----------|---------|-----------------------|----------|-----------------|
|                                             | OR                    | (95% CI) | p-value | AOR <sup>a</sup>      | (95% CI) | p-value | AOR <sup>b</sup>      | (95% CI) | p-value         |
| <b>Intervention</b>                         |                       |          |         |                       |          |         |                       |          |                 |
| Control                                     | Ref.                  |          |         | Ref.                  |          |         | Ref.                  |          |                 |
| Intervention                                | 6.58 ( 2.53 - 17.07 ) |          | <0.001  | 7.80 ( 1.22 - 49.73 ) |          | 0.030   | 8.04 ( 1.17 - 55.08 ) |          | 0.034           |
| <b>1) Socio-demographic characteristics</b> |                       |          |         |                       |          |         |                       |          |                 |
| <b>Age in years</b>                         |                       |          |         |                       |          |         | 1.05 ( 0.96 - 1.15 )  |          | 0.311           |
| <b>Education</b>                            |                       |          |         |                       |          |         |                       |          |                 |
| Never                                       |                       |          |         |                       |          |         | Ref.                  |          |                 |
| Primary and more                            |                       |          |         |                       |          |         | 1.18 ( 0.45 - 3.13 )  |          | 0.738           |
| <b>Religion</b>                             |                       |          |         |                       |          |         |                       |          |                 |
| Christian                                   |                       |          |         |                       |          |         | Ref.                  |          |                 |
| Muslim                                      |                       |          |         |                       |          |         | 1.75 ( 0.46 - 6.61 )  |          | 0.409           |
| <b>Wealth index</b>                         |                       |          |         |                       |          |         |                       |          |                 |
| Poor                                        |                       |          |         |                       |          |         | Ref.                  |          |                 |
| Middle                                      |                       |          |         |                       |          |         | 1.35 ( 0.53 - 3.47 )  |          | 0.528           |
| Rich                                        |                       |          |         |                       |          |         | 0.75 ( 0.26 - 2.20 )  |          | 0.604           |
| <b>No. of children</b>                      |                       |          |         |                       |          |         | 0.90 ( 0.64 - 1.28 )  |          | 0.560           |
| <b>Pregnancy intention</b>                  |                       |          |         |                       |          |         |                       |          |                 |
| No                                          |                       |          |         |                       |          |         | Ref.                  |          |                 |
| Yes                                         |                       |          |         |                       |          |         | 0.73 ( 0.18 - 2.92 )  |          | 0.657           |
| Don't know                                  |                       |          |         |                       |          |         | 1.31 ( 0.23 - 7.51 )  |          | 0.763           |
| <b>Partner's pregnancy intention</b>        |                       |          |         |                       |          |         |                       |          |                 |
| No                                          |                       |          |         |                       |          |         | Ref.                  |          |                 |
| Yes                                         |                       |          |         |                       |          |         | 1.27 ( 0.30 - 5.40 )  |          | 0.743           |
| Don't know                                  |                       |          |         |                       |          |         | 0.84 ( 0.17 - 4.17 )  |          | 0.836           |
| <b>History of unintended pregnancy</b>      |                       |          |         |                       |          |         |                       |          |                 |
| No                                          |                       |          |         |                       |          |         | Ref.                  |          |                 |
| Yes                                         |                       |          |         |                       |          |         | 0.79 ( 0.32 - 1.96 )  |          | 0.607           |
| <b>Multiple sex partners</b>                |                       |          |         |                       |          |         |                       |          |                 |
| No                                          |                       |          |         |                       |          |         | Ref.                  |          |                 |
| Yes                                         |                       |          |         |                       |          |         | 1.59 ( 0.29 - 8.78 )  |          | 0.597           |
| <b>2) HIV-related characteristics</b>       |                       |          |         |                       |          |         |                       |          |                 |
| <b>HIV status</b>                           |                       |          |         |                       |          |         |                       |          |                 |
| Negative                                    |                       |          |         |                       |          |         | Ref.                  |          |                 |
| Positive                                    |                       |          |         |                       |          |         | 4.08 ( 0.86 - 19.27 ) |          | 0.076           |
| <b>Partner's HIV status</b>                 |                       |          |         |                       |          |         |                       |          |                 |
| Negative                                    |                       |          |         |                       |          |         | Ref.                  |          |                 |
| Positive                                    |                       |          |         |                       |          |         | 0.51 ( 0.07 - 3.47 )  |          | 0.489           |
| Don't know                                  |                       |          |         |                       |          |         | 0.93 ( 0.30 - 2.92 )  |          | 0.901           |
| <b>HIV/STI risk perception</b>              |                       |          |         |                       |          |         |                       |          |                 |
| No risk at all                              |                       |          |         |                       |          |         | Ref.                  |          |                 |
| Small                                       |                       |          |         |                       |          |         | 1.21 ( 0.29 - 5.09 )  |          | 0.791           |
| Moderate                                    |                       |          |         |                       |          |         | 0.91 ( 0.20 - 4.25 )  |          | 0.907           |
| Great                                       |                       |          |         |                       |          |         | 0.98 ( 0.20 - 4.82 )  |          | 0.983           |
| <b>3) HEC use</b>                           |                       |          |         |                       |          |         |                       |          |                 |
| <b>Type of HECs</b>                         |                       |          |         |                       |          |         |                       |          |                 |
| Injectables                                 |                       |          |         |                       |          |         | Ref.                  |          |                 |
| Implants                                    |                       |          |         |                       |          |         | 1.09 ( 0.44 - 2.67 )  |          | 0.853           |
| IUDs                                        |                       |          |         |                       |          |         | 1.95 ( 0.55 - 6.93 )  |          | 0.304           |
| OCPs                                        |                       |          |         |                       |          |         | 1.51 ( 0.27 - 8.57 )  |          | 0.642           |
| Female sterilization                        |                       |          |         |                       |          |         |                       |          | Perfect success |
| <b>4) Other psychosocial charactericts</b>  |                       |          |         |                       |          |         |                       |          |                 |
| <b>HIV-related knowledge (HIV-KQ-18)</b>    |                       |          |         |                       |          |         | 1.02 ( 0.87 - 1.18 )  |          | 0.834           |
| <b>Condom use self-efficacy scale</b>       |                       |          |         |                       |          |         | 1.02 ( 0.97 - 1.07 )  |          | 0.549           |
| <b>Sexual Relationship Power Scale</b>      |                       |          |         |                       |          |         |                       |          |                 |
| Low                                         |                       |          |         |                       |          |         | Ref.                  |          |                 |
| Medium                                      |                       |          |         |                       |          |         | 0.93 ( 0.36 - 2.43 )  |          | 0.885           |
| High                                        |                       |          |         |                       |          |         | 0.56 ( 0.18 - 1.71 )  |          | 0.310           |

OR: odds ratio; AOR: adjusted odds ratio; SD: standard deviation; HEC: highly effective contraceptive; IUD: intrauterine device; OCP: oral contraceptive pill

a. Adjusted for the cluster effect and individuals

b. Adjusted for age, education, religion, wealth index, number of children, pregnancy intention, partner's pregnancy intention, history of unintended pregnancy, multiple sex partnership, HIV status, partner's HIV status, HIV/STI risk perception, HIV-related knowledge, condom use self-efficacy, and sexual relationship control power.

**Table S10.** Effects of intervention on consistent dual-method contraceptive use among women at 8 months after enrolment

| Variables                                    | Model 1               |          |         | Model 2               |          |         | Model 3                |          |                 |
|----------------------------------------------|-----------------------|----------|---------|-----------------------|----------|---------|------------------------|----------|-----------------|
|                                              | OR                    | (95% CI) | p-value | AOR <sup>a</sup>      | (95% CI) | p-value | AOR <sup>b</sup>       | (95% CI) | p-value         |
| <b>Intervention</b>                          |                       |          |         |                       |          |         |                        |          |                 |
| Control                                      | Ref.                  |          |         | Ref.                  |          |         | Ref.                   |          |                 |
| Intervention                                 | 9.43 ( 3.70 - 24.06 ) |          | <0.001  | 9.97 ( 2.11 - 47.15 ) |          | 0.004   | 10.72 ( 2.03 - 56.64 ) |          | 0.005           |
| <b>1) Socio-demographic characteristics</b>  |                       |          |         |                       |          |         |                        |          |                 |
| <b>Age in years</b>                          |                       |          |         |                       |          |         | 1.05 ( 0.96 - 1.14 )   |          | 0.270           |
| <b>Education</b>                             |                       |          |         |                       |          |         | Ref.                   |          |                 |
| Never                                        |                       |          |         |                       |          |         | Ref.                   |          |                 |
| Primary and more                             |                       |          |         |                       |          |         | 0.90 ( 0.40 - 2.00 )   |          | 0.788           |
| <b>Religion</b>                              |                       |          |         |                       |          |         | Ref.                   |          |                 |
| Christian                                    |                       |          |         |                       |          |         | Ref.                   |          |                 |
| Muslim                                       |                       |          |         |                       |          |         | 1.15 ( 0.31 - 4.29 )   |          | 0.832           |
| <b>Wealth index</b>                          |                       |          |         |                       |          |         | Ref.                   |          |                 |
| Poor                                         |                       |          |         |                       |          |         | Ref.                   |          |                 |
| Middle                                       |                       |          |         |                       |          |         | 1.46 ( 0.63 - 3.38 )   |          | 0.373           |
| Rich                                         |                       |          |         |                       |          |         | 1.52 ( 0.61 - 3.80 )   |          | 0.373           |
| <b>No. of children</b>                       |                       |          |         |                       |          |         | 0.89 ( 0.65 - 1.22 )   |          | 0.463           |
| <b>Pregnancy intention</b>                   |                       |          |         |                       |          |         | Ref.                   |          |                 |
| No                                           |                       |          |         |                       |          |         | Ref.                   |          |                 |
| Yes                                          |                       |          |         |                       |          |         | 0.40 ( 0.12 - 1.34 )   |          | 0.137           |
| Don't know                                   |                       |          |         |                       |          |         | 0.93 ( 0.22 - 3.98 )   |          | 0.923           |
| <b>Partner's pregnancy intention</b>         |                       |          |         |                       |          |         | Ref.                   |          |                 |
| No                                           |                       |          |         |                       |          |         | Ref.                   |          |                 |
| Yes                                          |                       |          |         |                       |          |         | 1.80 ( 0.47 - 6.86 )   |          | 0.390           |
| Don't know                                   |                       |          |         |                       |          |         | 1.34 ( 0.34 - 5.24 )   |          | 0.674           |
| <b>History of unintended pregnancy</b>       |                       |          |         |                       |          |         | Ref.                   |          |                 |
| No                                           |                       |          |         |                       |          |         | Ref.                   |          |                 |
| Yes                                          |                       |          |         |                       |          |         | 0.86 ( 0.40 - 1.83 )   |          | 0.688           |
| <b>Multiple sex partners</b>                 |                       |          |         |                       |          |         | Ref.                   |          |                 |
| No                                           |                       |          |         |                       |          |         | Ref.                   |          |                 |
| Yes                                          |                       |          |         |                       |          |         | 0.94 ( 0.17 - 5.16 )   |          | 0.942           |
| <b>2) HIV-related characteristics</b>        |                       |          |         |                       |          |         |                        |          |                 |
| <b>HIV status</b>                            |                       |          |         |                       |          |         | Ref.                   |          |                 |
| Negative                                     |                       |          |         |                       |          |         | Ref.                   |          |                 |
| Positive                                     |                       |          |         |                       |          |         | 1.16 ( 0.20 - 6.63 )   |          | 0.868           |
| <b>Partner's HIV status</b>                  |                       |          |         |                       |          |         | Ref.                   |          |                 |
| Negative                                     |                       |          |         |                       |          |         | Ref.                   |          |                 |
| Positive                                     |                       |          |         |                       |          |         | 1.12 ( 0.18 - 7.00 )   |          | 0.905           |
| Don't know                                   |                       |          |         |                       |          |         | 0.41 ( 0.12 - 1.36 )   |          | 0.146           |
| <b>HIV/STI risk perception</b>               |                       |          |         |                       |          |         | Ref.                   |          |                 |
| No risk at all                               |                       |          |         |                       |          |         | Ref.                   |          |                 |
| Small                                        |                       |          |         |                       |          |         | 0.85 ( 0.27 - 2.70 )   |          | 0.782           |
| Moderate                                     |                       |          |         |                       |          |         | 0.96 ( 0.29 - 3.16 )   |          | 0.944           |
| Great                                        |                       |          |         |                       |          |         | 1.20 ( 0.33 - 4.34 )   |          | 0.785           |
| <b>3) HEC use</b>                            |                       |          |         |                       |          |         |                        |          |                 |
| <b>Type of HECs</b>                          |                       |          |         |                       |          |         | Ref.                   |          |                 |
| Injectables                                  |                       |          |         |                       |          |         | Ref.                   |          |                 |
| Implants                                     |                       |          |         |                       |          |         | 0.85 ( 0.38 - 1.89 )   |          | 0.685           |
| IUDs                                         |                       |          |         |                       |          |         | 2.55 ( 0.87 - 7.46 )   |          | 0.087           |
| OCPs                                         |                       |          |         |                       |          |         | 0.60 ( 0.11 - 3.37 )   |          | 0.566           |
| Female sterilization                         |                       |          |         |                       |          |         |                        |          | Perfect success |
| <b>4) Other psychosocial characteristics</b> |                       |          |         |                       |          |         |                        |          |                 |
| <b>HIV-related knowledge (HIV-KQ-18)</b>     |                       |          |         |                       |          |         | 1.02 ( 0.89 - 1.16 )   |          | 0.779           |
| <b>Condom use self-efficacy scale</b>        |                       |          |         |                       |          |         | 1.00 ( 0.96 - 1.05 )   |          | 0.858           |
| <b>Sexual Relationship Power Scale</b>       |                       |          |         |                       |          |         | Ref.                   |          |                 |
| Low                                          |                       |          |         |                       |          |         | Ref.                   |          |                 |
| Medium                                       |                       |          |         |                       |          |         | 0.90 ( 0.37 - 2.16 )   |          | 0.806           |
| High                                         |                       |          |         |                       |          |         | 1.11 ( 0.44 - 2.83 )   |          | 0.829           |

OR: odds ratio; AOR: adjusted odds ratio; SD: standard deviation; HEC: highly effective contraceptive; IUD: intrauterine device; OCP: oral contraceptive pill

a. Adjusted for the cluster effect and individuals

b. Adjusted for age, education, religion, wealth index, number of children, pregnancy intention, partner's pregnancy intention, history of unintended pregnancy, multiple sex partnership, HIV status, partner's HIV status, HIV/STI risk perception, HIV-related knowledge, condom use self-efficacy, and sexual relationship control power.

**Table S11.** Effects of intervention on communication about HIV/STI risk among women at 2 months after enrollement

| Variables                                    | Model 1              |          |         | Model 2              |          |         | Model 3               |          |         |
|----------------------------------------------|----------------------|----------|---------|----------------------|----------|---------|-----------------------|----------|---------|
|                                              | OR                   | (95% CI) | p-value | AOR <sup>a</sup>     | (95% CI) | p-value | AOR <sup>b</sup>      | (95% CI) | p-value |
| <b>Intervention</b>                          |                      |          |         |                      |          |         |                       |          |         |
| Control                                      | Ref.                 |          |         | Ref.                 |          |         | Ref.                  |          |         |
| Intervention                                 | 2.73 ( 1.92 - 3.90 ) |          | <0.001  | 1.03 ( 0.73 - 1.46 ) |          | 0.863   | 0.98 ( 0.68 - 1.42 )  |          | 0.920   |
| <b>Time</b>                                  |                      |          |         | 2.19 ( 1.62 - 2.97 ) |          | <0.001  | 2.29 ( 1.70 - 3.09 )  |          | <0.001  |
| <b>Intervention*time<sup>c</sup></b>         |                      |          |         | 2.70 ( 1.72 - 4.23 ) |          | <0.001  | 2.70 ( 1.72 - 4.24 )  |          | <0.001  |
| <b>1) Socio-demographic characteristics</b>  |                      |          |         |                      |          |         |                       |          |         |
| <b>Age in years</b>                          |                      |          |         |                      |          |         | 0.99 ( 0.97 - 1.02 )  |          | 0.518   |
| <b>Education</b>                             |                      |          |         |                      |          |         |                       |          |         |
| Never                                        |                      |          |         |                      |          |         | Ref.                  |          |         |
| Primary and more                             |                      |          |         |                      |          |         | 0.92 ( 0.70 - 1.20 )  |          | 0.527   |
| <b>Religion</b>                              |                      |          |         |                      |          |         |                       |          |         |
| Christian                                    |                      |          |         |                      |          |         | Ref.                  |          |         |
| Muslim                                       |                      |          |         |                      |          |         | 0.88 ( 0.59 - 1.32 )  |          | 0.540   |
| <b>Wealth index</b>                          |                      |          |         |                      |          |         |                       |          |         |
| Poor                                         |                      |          |         |                      |          |         | Ref.                  |          |         |
| Middle                                       |                      |          |         |                      |          |         | 0.98 ( 0.75 - 1.29 )  |          | 0.909   |
| Rich                                         |                      |          |         |                      |          |         | 0.97 ( 0.73 - 1.30 )  |          | 0.852   |
| <b>No. of children</b>                       |                      |          |         |                      |          |         | 0.92 ( 0.84 - 1.02 )  |          | 0.101   |
| <b>Pregnancy intention</b>                   |                      |          |         |                      |          |         |                       |          |         |
| No                                           |                      |          |         |                      |          |         | Ref.                  |          |         |
| Yes                                          |                      |          |         |                      |          |         | 0.77 ( 0.52 - 1.13 )  |          | 0.185   |
| Don't know                                   |                      |          |         |                      |          |         | 0.75 ( 0.45 - 1.23 )  |          | 0.247   |
| <b>Partner's pregnancy intention</b>         |                      |          |         |                      |          |         |                       |          |         |
| No                                           |                      |          |         |                      |          |         | Ref.                  |          |         |
| Yes                                          |                      |          |         |                      |          |         | 1.14 ( 0.74 - 1.75 )  |          | 0.560   |
| Don't know                                   |                      |          |         |                      |          |         | 1.13 ( 0.73 - 1.76 )  |          | 0.588   |
| <b>History of unintended pregnancy</b>       |                      |          |         |                      |          |         |                       |          |         |
| No                                           |                      |          |         |                      |          |         | Ref.                  |          |         |
| Yes                                          |                      |          |         |                      |          |         | 1.30 ( 1.02 - 1.66 )  |          | 0.037   |
| <b>Multiple sex partners</b>                 |                      |          |         |                      |          |         |                       |          |         |
| No                                           |                      |          |         |                      |          |         | Ref.                  |          |         |
| Yes                                          |                      |          |         |                      |          |         | 1.88 ( 1.12 - 3.17 )  |          | 0.017   |
| <b>2) HIV-related characteristics</b>        |                      |          |         |                      |          |         |                       |          |         |
| <b>HIV status</b>                            |                      |          |         |                      |          |         |                       |          |         |
| Negative                                     |                      |          |         |                      |          |         | Ref.                  |          |         |
| Positive                                     |                      |          |         |                      |          |         | 2.03 ( 1.06 - 3.89 )  |          | 0.034   |
| <b>Partner's HIV status</b>                  |                      |          |         |                      |          |         |                       |          |         |
| Negative                                     |                      |          |         |                      |          |         | Ref.                  |          |         |
| Positive                                     |                      |          |         |                      |          |         | 0.87 ( 0.44 - 1.72 )  |          | 0.683   |
| Don't know                                   |                      |          |         |                      |          |         | 0.90 ( 0.65 - 1.25 )  |          | 0.518   |
| <b>HIV/STI risk perception</b>               |                      |          |         |                      |          |         |                       |          |         |
| No risk at all                               |                      |          |         |                      |          |         | Ref.                  |          |         |
| Small                                        |                      |          |         |                      |          |         | 1.07 ( 0.77 - 1.48 )  |          | 0.704   |
| Moderate                                     |                      |          |         |                      |          |         | 1.10 ( 0.78 - 1.55 )  |          | 0.598   |
| Great                                        |                      |          |         |                      |          |         | 1.04 ( 0.71 - 1.53 )  |          | 0.835   |
| <b>3) HEC use</b>                            |                      |          |         |                      |          |         |                       |          |         |
| <b>Type of HECs</b>                          |                      |          |         |                      |          |         |                       |          |         |
| Injectables                                  |                      |          |         |                      |          |         | Ref.                  |          |         |
| Implants                                     |                      |          |         |                      |          |         | 0.97 ( 0.76 - 1.24 )  |          | 0.817   |
| IUDs                                         |                      |          |         |                      |          |         | 1.17 ( 0.80 - 1.70 )  |          | 0.421   |
| OCPs                                         |                      |          |         |                      |          |         | 1.07 ( 0.68 - 1.70 )  |          | 0.765   |
| Female sterilization                         |                      |          |         |                      |          |         | 3.75 ( 0.61 - 22.98 ) |          | 0.153   |
| <b>4) Other psychosocial characteristics</b> |                      |          |         |                      |          |         |                       |          |         |
| <b>HIV-related knowledge (HIV-KQ-18)</b>     |                      |          |         |                      |          |         | 1.04 ( 1.00 - 1.09 )  |          | 0.058   |
| <b>Condom use self-efficacy scale</b>        |                      |          |         |                      |          |         | 1.04 ( 1.02 - 1.05 )  |          | <0.001  |
| <b>Sexual Relationship Power Scale</b>       |                      |          |         |                      |          |         |                       |          |         |
| Low                                          |                      |          |         |                      |          |         | Ref.                  |          |         |
| Medium                                       |                      |          |         |                      |          |         | 1.02 ( 0.79 - 1.33 )  |          | 0.858   |
| High                                         |                      |          |         |                      |          |         | 1.19 ( 0.89 - 1.59 )  |          | 0.248   |

OR: odds ratio; AOR: adjusted odds ratio; SD: standard deviation; HEC: highly effective contraceptive; IUD: intrauterine device; OCP: oral contraceptive pill

a. Adjusted for the cluster effect and individuals

b. Adjusted for age, education, religion, wealth index, number of children, pregnancy intention, partner's pregnancy intention, history of unintended pregnancy, multiple sex partnership, HIV status, partner's HIV status, HIV/STI risk perception, HIV-related knowledge, condom use self-efficacy, and sexual relationship control power.

c. Intervention\*time represents the status of the intervention group at follow-up in comparison with the control group at baseline.

**Table S12.** Effects of intervention on communication about HIV/STI risk among women at 4 months after enrollement

| Variables                                    | Model 1              |          |              | Model 2              |          |                  | Model 3               |          |                  |
|----------------------------------------------|----------------------|----------|--------------|----------------------|----------|------------------|-----------------------|----------|------------------|
|                                              | OR                   | (95% CI) | p-value      | AOR <sup>a</sup>     | (95% CI) | p-value          | AOR <sup>b</sup>      | (95% CI) | p-value          |
| <b>Intervention</b>                          |                      |          |              |                      |          |                  |                       |          |                  |
| Control                                      | Ref.                 |          |              | Ref.                 |          |                  | Ref.                  |          |                  |
| Intervention                                 | 1.81 ( 1.21 - 2.71 ) |          | <b>0.004</b> | 1.04 ( 0.72 - 1.50 ) |          | 0.841            | 0.99 ( 0.68 - 1.44 )  |          | 0.943            |
| <b>Time</b>                                  |                      |          |              | 5.07 ( 3.55 - 7.25 ) |          | <b>&lt;0.001</b> | 5.72 ( 4.08 - 8.02 )  |          | <b>&lt;0.001</b> |
| <b>Intervention*time<sup>c</sup></b>         |                      |          |              | 1.76 ( 1.08 - 2.86 ) |          | <b>0.023</b>     | 1.76 ( 1.07 - 2.89 )  |          | <b>0.025</b>     |
| <b>1) Socio-demographic characteristics</b>  |                      |          |              |                      |          |                  |                       |          |                  |
| <b>Age in years</b>                          |                      |          |              |                      |          |                  | 1.00 ( 0.98 - 1.03 )  |          | 0.973            |
| <b>Education</b>                             |                      |          |              |                      |          |                  |                       |          |                  |
| Never                                        |                      |          |              |                      |          |                  | Ref.                  |          |                  |
| Primary and more                             |                      |          |              |                      |          |                  | 0.88 ( 0.66 - 1.17 )  |          | 0.372            |
| <b>Religion</b>                              |                      |          |              |                      |          |                  |                       |          |                  |
| Christian                                    |                      |          |              |                      |          |                  | Ref.                  |          |                  |
| Muslim                                       |                      |          |              |                      |          |                  | 0.88 ( 0.57 - 1.34 )  |          | 0.548            |
| <b>Wealth index</b>                          |                      |          |              |                      |          |                  |                       |          |                  |
| Poor                                         |                      |          |              |                      |          |                  | Ref.                  |          |                  |
| Middle                                       |                      |          |              |                      |          |                  | 1.01 ( 0.76 - 1.34 )  |          | 0.947            |
| Rich                                         |                      |          |              |                      |          |                  | 0.88 ( 0.64 - 1.19 )  |          | 0.396            |
| <b>No. of children</b>                       |                      |          |              |                      |          |                  | 0.92 ( 0.83 - 1.02 )  |          | 0.109            |
| <b>Pregnancy intention</b>                   |                      |          |              |                      |          |                  |                       |          |                  |
| No                                           |                      |          |              |                      |          |                  | Ref.                  |          |                  |
| Yes                                          |                      |          |              |                      |          |                  | 0.97 ( 0.64 - 1.45 )  |          | 0.868            |
| Don't know                                   |                      |          |              |                      |          |                  | 1.07 ( 0.64 - 1.81 )  |          | 0.790            |
| <b>Partner's pregnancy intention</b>         |                      |          |              |                      |          |                  |                       |          |                  |
| No                                           |                      |          |              |                      |          |                  | Ref.                  |          |                  |
| Yes                                          |                      |          |              |                      |          |                  | 1.12 ( 0.71 - 1.76 )  |          | 0.636            |
| Don't know                                   |                      |          |              |                      |          |                  | 0.99 ( 0.62 - 1.58 )  |          | 0.964            |
| <b>History of unintended pregnancy</b>       |                      |          |              |                      |          |                  |                       |          |                  |
| No                                           |                      |          |              |                      |          |                  | Ref.                  |          |                  |
| Yes                                          |                      |          |              |                      |          |                  | 1.66 ( 1.28 - 2.16 )  |          | <b>&lt;0.001</b> |
| <b>Multiple sex partners</b>                 |                      |          |              |                      |          |                  |                       |          |                  |
| No                                           |                      |          |              |                      |          |                  | Ref.                  |          |                  |
| Yes                                          |                      |          |              |                      |          |                  | 1.86 ( 1.08 - 3.19 )  |          | <b>0.025</b>     |
| <b>2) HIV-related characteristics</b>        |                      |          |              |                      |          |                  |                       |          |                  |
| <b>HIV status</b>                            |                      |          |              |                      |          |                  |                       |          |                  |
| Negative                                     |                      |          |              |                      |          |                  | Ref.                  |          |                  |
| Positive                                     |                      |          |              |                      |          |                  | 1.88 ( 0.95 - 3.73 )  |          | 0.072            |
| <b>Partner's HIV status</b>                  |                      |          |              |                      |          |                  |                       |          |                  |
| Negative                                     |                      |          |              |                      |          |                  | Ref.                  |          |                  |
| Positive                                     |                      |          |              |                      |          |                  | 0.96 ( 0.46 - 1.98 )  |          | 0.907            |
| Don't know                                   |                      |          |              |                      |          |                  | 0.87 ( 0.61 - 1.22 )  |          | 0.410            |
| <b>HIV/STI risk perception</b>               |                      |          |              |                      |          |                  |                       |          |                  |
| No risk at all                               |                      |          |              |                      |          |                  | Ref.                  |          |                  |
| Small                                        |                      |          |              |                      |          |                  | 1.14 ( 0.80 - 1.61 )  |          | 0.470            |
| Moderate                                     |                      |          |              |                      |          |                  | 1.07 ( 0.74 - 1.54 )  |          | 0.725            |
| Great                                        |                      |          |              |                      |          |                  | 1.09 ( 0.73 - 1.64 )  |          | 0.677            |
| <b>3) HEC use</b>                            |                      |          |              |                      |          |                  |                       |          |                  |
| <b>Type of HECs</b>                          |                      |          |              |                      |          |                  |                       |          |                  |
| Injectables                                  |                      |          |              |                      |          |                  | Ref.                  |          |                  |
| Implants                                     |                      |          |              |                      |          |                  | 0.87 ( 0.67 - 1.13 )  |          | 0.287            |
| IUDs                                         |                      |          |              |                      |          |                  | 1.29 ( 0.87 - 1.93 )  |          | 0.206            |
| OCPs                                         |                      |          |              |                      |          |                  | 1.24 ( 0.75 - 2.04 )  |          | 0.400            |
| Female sterilization                         |                      |          |              |                      |          |                  | 3.41 ( 0.52 - 22.20 ) |          | 0.200            |
| <b>4) Other psychosocial characteristics</b> |                      |          |              |                      |          |                  |                       |          |                  |
| <b>HIV-related knowledge (HIV-KQ-18)</b>     |                      |          |              |                      |          |                  | 1.03 ( 0.98 - 1.08 )  |          | 0.219            |
| <b>Condom use self-efficacy scale</b>        |                      |          |              |                      |          |                  | 1.04 ( 1.03 - 1.06 )  |          | <b>&lt;0.001</b> |
| <b>Sexual Relationship Power Scale</b>       |                      |          |              |                      |          |                  |                       |          |                  |
| Low                                          |                      |          |              |                      |          |                  | Ref.                  |          |                  |
| Medium                                       |                      |          |              |                      |          |                  | 1.12 ( 0.85 - 1.47 )  |          | 0.419            |
| High                                         |                      |          |              |                      |          |                  | 1.32 ( 0.97 - 1.81 )  |          | 0.075            |

OR: odds ratio; AOR: adjusted odds ratio; SD: standard deviation; HEC: highly effective contraceptive; IUD: intrauterine device; OCP: oral contraceptive pill

a. Adjusted for the cluster effect and individuals

b. Adjusted for age, education, religion, wealth index, number of children, pregnancy intention, partner's pregnancy intention, history of unintended pregnancy, multiple sex partnership, HIV status, partner's HIV status, HIV/STI risk perception, HIV-related knowledge, condom use self-efficacy, and sexual relationship control power.

c. Intervention\*time represents the status of the intervention group at follow-up in comparison with the control group at baseline.

**Table S13.** Effects of intervention on communication about HIV/STI risk among women at 6 months after enrollement

| Variables                                    | Model 1              |          |         | Model 2              |          |         | Model 3              |          |         |
|----------------------------------------------|----------------------|----------|---------|----------------------|----------|---------|----------------------|----------|---------|
|                                              | OR                   | (95% CI) | p-value | AOR <sup>a</sup>     | (95% CI) | p-value | AOR <sup>b</sup>     | (95% CI) | p-value |
| <b>Intervention</b>                          |                      |          |         |                      |          |         |                      |          |         |
| Control                                      | Ref.                 |          |         | Ref.                 |          |         | Ref.                 |          |         |
| Intervention                                 | 3.33 ( 2.13 - 5.20 ) |          | <0.001  | 1.05 ( 0.78 - 1.41 ) |          | 0.741   | 1.00 ( 0.74 - 1.35 ) |          | 0.991   |
| <b>Time</b>                                  |                      |          |         | 4.12 ( 3.04 - 5.59 ) |          | <0.001  | 4.45 ( 3.25 - 6.10 ) |          | <0.001  |
| <b>Intervention*time<sup>c</sup></b>         |                      |          |         | 3.23 ( 1.93 - 5.41 ) |          | <0.001  | 3.35 ( 1.99 - 5.66 ) |          | <0.001  |
| <b>1) Socio-demographic characteristics</b>  |                      |          |         |                      |          |         |                      |          |         |
| <b>Age in years</b>                          |                      |          |         |                      |          |         | 0.99 ( 0.96 - 1.01 ) |          | 0.298   |
| <b>Education</b>                             |                      |          |         |                      |          |         |                      |          |         |
| Never                                        |                      |          |         |                      |          |         | Ref.                 |          |         |
| Primary and more                             |                      |          |         |                      |          |         | 0.91 ( 0.69 - 1.20 ) |          | 0.492   |
| <b>Religion</b>                              |                      |          |         |                      |          |         |                      |          |         |
| Christian                                    |                      |          |         |                      |          |         | Ref.                 |          |         |
| Muslim                                       |                      |          |         |                      |          |         | 0.99 ( 0.65 - 1.51 ) |          | 0.967   |
| <b>Wealth index</b>                          |                      |          |         |                      |          |         |                      |          |         |
| Poor                                         |                      |          |         |                      |          |         | Ref.                 |          |         |
| Middle                                       |                      |          |         |                      |          |         | 1.01 ( 0.76 - 1.34 ) |          | 0.958   |
| Rich                                         |                      |          |         |                      |          |         | 0.90 ( 0.66 - 1.22 ) |          | 0.481   |
| <b>No. of children</b>                       |                      |          |         |                      |          |         | 0.95 ( 0.86 - 1.05 ) |          | 0.291   |
| <b>Pregnancy intention</b>                   |                      |          |         |                      |          |         |                      |          |         |
| No                                           |                      |          |         |                      |          |         | Ref.                 |          |         |
| Yes                                          |                      |          |         |                      |          |         | 1.12 ( 0.75 - 1.67 ) |          | 0.576   |
| Don't know                                   |                      |          |         |                      |          |         | 0.93 ( 0.56 - 1.56 ) |          | 0.795   |
| <b>Partner's pregnancy intention</b>         |                      |          |         |                      |          |         |                      |          |         |
| No                                           |                      |          |         |                      |          |         | Ref.                 |          |         |
| Yes                                          |                      |          |         |                      |          |         | 0.91 ( 0.58 - 1.42 ) |          | 0.678   |
| Don't know                                   |                      |          |         |                      |          |         | 0.89 ( 0.56 - 1.41 ) |          | 0.621   |
| <b>History of unintended pregnancy</b>       |                      |          |         |                      |          |         |                      |          |         |
| No                                           |                      |          |         |                      |          |         | Ref.                 |          |         |
| Yes                                          |                      |          |         |                      |          |         | 1.45 ( 1.12 - 1.87 ) |          | 0.005   |
| <b>Multiple sex partners</b>                 |                      |          |         |                      |          |         |                      |          |         |
| No                                           |                      |          |         |                      |          |         | Ref.                 |          |         |
| Yes                                          |                      |          |         |                      |          |         | 2.29 ( 1.32 - 3.99 ) |          | 0.003   |
| <b>2) HIV-related characteristics</b>        |                      |          |         |                      |          |         |                      |          |         |
| <b>HIV status</b>                            |                      |          |         |                      |          |         |                      |          |         |
| Negative                                     |                      |          |         |                      |          |         | Ref.                 |          |         |
| Positive                                     |                      |          |         |                      |          |         | 1.19 ( 0.62 - 2.29 ) |          | 0.591   |
| <b>Partner's HIV status</b>                  |                      |          |         |                      |          |         |                      |          |         |
| Negative                                     |                      |          |         |                      |          |         | Ref.                 |          |         |
| Positive                                     |                      |          |         |                      |          |         | 1.09 ( 0.54 - 2.19 ) |          | 0.807   |
| Don't know                                   |                      |          |         |                      |          |         | 1.03 ( 0.73 - 1.45 ) |          | 0.858   |
| <b>HIV/STI risk perception</b>               |                      |          |         |                      |          |         |                      |          |         |
| No risk at all                               |                      |          |         |                      |          |         | Ref.                 |          |         |
| Small                                        |                      |          |         |                      |          |         | 1.14 ( 0.81 - 1.61 ) |          | 0.443   |
| Moderate                                     |                      |          |         |                      |          |         | 1.03 ( 0.72 - 1.48 ) |          | 0.875   |
| Great                                        |                      |          |         |                      |          |         | 1.05 ( 0.70 - 1.56 ) |          | 0.828   |
| <b>3) HEC use</b>                            |                      |          |         |                      |          |         |                      |          |         |
| <b>Type of HECs</b>                          |                      |          |         |                      |          |         |                      |          |         |
| Injectables                                  |                      |          |         |                      |          |         | Ref.                 |          |         |
| Implants                                     |                      |          |         |                      |          |         | 1.03 ( 0.80 - 1.33 ) |          | 0.810   |
| IUDs                                         |                      |          |         |                      |          |         | 0.97 ( 0.66 - 1.42 ) |          | 0.869   |
| OCPs                                         |                      |          |         |                      |          |         | 1.30 ( 0.80 - 2.12 ) |          | 0.288   |
| Female sterilization                         |                      |          |         |                      |          |         | 1.51 ( 0.25 - 9.05 ) |          | 0.650   |
| <b>4) Other psychosocial characteristics</b> |                      |          |         |                      |          |         |                      |          |         |
| <b>HIV-related knowledge (HIV-KQ-18)</b>     |                      |          |         |                      |          |         | 1.04 ( 0.99 - 1.08 ) |          | 0.106   |
| <b>Condom use self-efficacy scale</b>        |                      |          |         |                      |          |         | 1.03 ( 1.02 - 1.05 ) |          | <0.001  |
| <b>Sexual Relationship Power Scale</b>       |                      |          |         |                      |          |         |                      |          |         |
| Low                                          |                      |          |         |                      |          |         | Ref.                 |          |         |
| Medium                                       |                      |          |         |                      |          |         | 1.09 ( 0.83 - 1.43 ) |          | 0.551   |
| High                                         |                      |          |         |                      |          |         | 1.27 ( 0.94 - 1.72 ) |          | 0.122   |

OR: odds ratio; AOR: adjusted odds ratio; SD: standard deviation; HEC: highly effective contraceptive; IUD: intrauterine device; OCP: oral contraceptive pill

a. Adjusted for the cluster effect and individuals

b. Adjusted for age, education, religion, wealth index, number of children, pregnancy intention, partner's pregnancy intention, history of unintended pregnancy, multiple sex partnership, HIV status, partner's HIV status, HIV/STI risk perception, HIV-related knowledge, condom use self-efficacy, and sexual relationship control power.

c. Intervention\*time represents the status of the intervention group at follow-up in comparison with the control group at baseline.



**Table S14.** Effects of intervention on communication about HIV/STI risk among women at 8 months after enrollement

| Variables                                    | Model 1              |          |              | Model 2              |          |                  | Model 3               |          |                  |
|----------------------------------------------|----------------------|----------|--------------|----------------------|----------|------------------|-----------------------|----------|------------------|
|                                              | OR                   | (95% CI) | p-value      | AOR <sup>a</sup>     | (95% CI) | p-value          | AOR <sup>b</sup>      | (95% CI) | p-value          |
| <b>Intervention</b>                          |                      |          |              |                      |          |                  |                       |          |                  |
| Control                                      | Ref.                 |          |              | Ref.                 |          |                  | Ref.                  |          |                  |
| Intervention                                 | 1.75 ( 1.22 - 2.52 ) |          | <b>0.002</b> | 1.04 ( 0.68 - 1.59 ) |          | 0.858            | 0.99 ( 0.65 - 1.51 )  |          | 0.959            |
| <b>Time</b>                                  |                      |          |              | 3.65 ( 2.71 - 4.92 ) |          | <b>&lt;0.001</b> | 3.85 ( 2.83 - 5.22 )  |          | <b>&lt;0.001</b> |
| <b>Intervention*time<sup>c</sup></b>         |                      |          |              | 1.75 ( 1.12 - 2.74 ) |          | <b>0.015</b>     | 1.80 ( 1.14 - 2.84 )  |          | <b>0.012</b>     |
| <b>1) Socio-demographic characteristics</b>  |                      |          |              |                      |          |                  |                       |          |                  |
| <b>Age in years</b>                          |                      |          |              |                      |          |                  | 0.99 ( 0.97 - 1.02 )  |          | 0.555            |
| <b>Education</b>                             |                      |          |              |                      |          |                  |                       |          |                  |
| Never                                        |                      |          |              |                      |          |                  | Ref.                  |          |                  |
| Primary and more                             |                      |          |              |                      |          |                  | 1.07 ( 0.82 - 1.40 )  |          | 0.610            |
| <b>Religion</b>                              |                      |          |              |                      |          |                  |                       |          |                  |
| Christian                                    |                      |          |              |                      |          |                  | Ref.                  |          |                  |
| Muslim                                       |                      |          |              |                      |          |                  | 0.85 ( 0.57 - 1.29 )  |          | 0.453            |
| <b>Wealth index</b>                          |                      |          |              |                      |          |                  |                       |          |                  |
| Poor                                         |                      |          |              |                      |          |                  | Ref.                  |          |                  |
| Middle                                       |                      |          |              |                      |          |                  | 1.05 ( 0.79 - 1.38 )  |          | 0.749            |
| Rich                                         |                      |          |              |                      |          |                  | 0.98 ( 0.73 - 1.33 )  |          | 0.918            |
| <b>No. of children</b>                       |                      |          |              |                      |          |                  | 0.97 ( 0.88 - 1.07 )  |          | 0.552            |
| <b>Pregnancy intention</b>                   |                      |          |              |                      |          |                  |                       |          |                  |
| No                                           |                      |          |              |                      |          |                  | Ref.                  |          |                  |
| Yes                                          |                      |          |              |                      |          |                  | 0.94 ( 0.64 - 1.39 )  |          | 0.763            |
| Don't know                                   |                      |          |              |                      |          |                  | 0.94 ( 0.57 - 1.55 )  |          | 0.814            |
| <b>Partner's pregnancy intention</b>         |                      |          |              |                      |          |                  |                       |          |                  |
| No                                           |                      |          |              |                      |          |                  | Ref.                  |          |                  |
| Yes                                          |                      |          |              |                      |          |                  | 1.17 ( 0.76 - 1.80 )  |          | 0.474            |
| Don't know                                   |                      |          |              |                      |          |                  | 1.20 ( 0.77 - 1.87 )  |          | 0.432            |
| <b>History of unintended pregnancy</b>       |                      |          |              |                      |          |                  |                       |          |                  |
| No                                           |                      |          |              |                      |          |                  | Ref.                  |          |                  |
| Yes                                          |                      |          |              |                      |          |                  | 1.44 ( 1.13 - 1.85 )  |          | <b>0.004</b>     |
| <b>Multiple sex partners</b>                 |                      |          |              |                      |          |                  |                       |          |                  |
| No                                           |                      |          |              |                      |          |                  | Ref.                  |          |                  |
| Yes                                          |                      |          |              |                      |          |                  | 1.92 ( 1.13 - 3.24 )  |          | <b>0.015</b>     |
| <b>2) HIV-related characteristics</b>        |                      |          |              |                      |          |                  |                       |          |                  |
| <b>HIV status</b>                            |                      |          |              |                      |          |                  |                       |          |                  |
| Negative                                     |                      |          |              |                      |          |                  | Ref.                  |          |                  |
| Positive                                     |                      |          |              |                      |          |                  | 2.07 ( 1.07 - 3.99 )  |          | <b>0.031</b>     |
| <b>Partner's HIV status</b>                  |                      |          |              |                      |          |                  |                       |          |                  |
| Negative                                     |                      |          |              |                      |          |                  | Ref.                  |          |                  |
| Positive                                     |                      |          |              |                      |          |                  | 0.72 ( 0.36 - 1.43 )  |          | 0.345            |
| Don't know                                   |                      |          |              |                      |          |                  | 0.87 ( 0.62 - 1.21 )  |          | 0.405            |
| <b>HIV/STI risk perception</b>               |                      |          |              |                      |          |                  |                       |          |                  |
| No risk at all                               |                      |          |              |                      |          |                  | Ref.                  |          |                  |
| Small                                        |                      |          |              |                      |          |                  | 1.15 ( 0.83 - 1.61 )  |          | 0.398            |
| Moderate                                     |                      |          |              |                      |          |                  | 1.19 ( 0.84 - 1.69 )  |          | 0.320            |
| Great                                        |                      |          |              |                      |          |                  | 1.16 ( 0.79 - 1.72 )  |          | 0.446            |
| <b>3) HEC use</b>                            |                      |          |              |                      |          |                  |                       |          |                  |
| <b>Type of HECs</b>                          |                      |          |              |                      |          |                  |                       |          |                  |
| Injectables                                  |                      |          |              |                      |          |                  | Ref.                  |          |                  |
| Implants                                     |                      |          |              |                      |          |                  | 1.11 ( 0.86 - 1.42 )  |          | 0.426            |
| IUDs                                         |                      |          |              |                      |          |                  | 1.18 ( 0.81 - 1.72 )  |          | 0.399            |
| OCPs                                         |                      |          |              |                      |          |                  | 1.08 ( 0.68 - 1.72 )  |          | 0.753            |
| Female sterilization                         |                      |          |              |                      |          |                  | 2.74 ( 0.44 - 17.17 ) |          | 0.283            |
| <b>4) Other psychosocial characteristics</b> |                      |          |              |                      |          |                  |                       |          |                  |
| <b>HIV-related knowledge (HIV-KQ-18)</b>     |                      |          |              |                      |          |                  | 1.03 ( 0.99 - 1.08 )  |          | 0.148            |
| <b>Condom use self-efficacy scale</b>        |                      |          |              |                      |          |                  | 1.03 ( 1.01 - 1.04 )  |          | <b>&lt;0.001</b> |
| <b>Sexual Relationship Power Scale</b>       |                      |          |              |                      |          |                  |                       |          |                  |
| Low                                          |                      |          |              |                      |          |                  | Ref.                  |          |                  |
| Medium                                       |                      |          |              |                      |          |                  | 1.28 ( 0.98 - 1.67 )  |          | 0.066            |
| High                                         |                      |          |              |                      |          |                  | 1.44 ( 1.07 - 1.94 )  |          | <b>0.016</b>     |

OR: odds ratio; AOR: adjusted odds ratio; SD: standard deviation; HEC: highly effective contraceptive; IUD: intrauterine device; OCP: oral contraceptive pill

a. Adjusted for the cluster effect and individuals

b. Adjusted for age, education, religion, wealth index, number of children, pregnancy intention, partner's pregnancy intention, history of unintended pregnancy, multiple sex partnership, HIV status, partner's HIV status, HIV/STI risk perception, HIV-related knowledge, condom use self-efficacy, and sexual relationship control power.

c. Intervention\*time represents the status of the intervention group at follow-up in comparison with the control group at baseline.

**Table S15.** Effects of intervention on the incidence of pregnancy among women at 2 months after enrollement

| Variables                                    | Model 1              |          |         | Model 2              |          |         | Model 3                |          |                 |
|----------------------------------------------|----------------------|----------|---------|----------------------|----------|---------|------------------------|----------|-----------------|
|                                              | OR                   | (95% CI) | p-value | AOR <sup>a</sup>     | (95% CI) | p-value | AOR <sup>b</sup>       | (95% CI) | p-value         |
| <b>Intervention</b>                          |                      |          |         |                      |          |         |                        |          |                 |
| Control                                      | Ref.                 |          |         | Ref.                 |          |         | Ref.                   |          |                 |
| Intervention                                 | 0.46 ( 0.08 - 2.50 ) |          | 0.365   | 0.46 ( 0.08 - 2.50 ) |          | 0.365   | 1.21 ( 0.09 - 15.75 )  |          | 0.882           |
| <b>1) Socio-demographic characteristics</b>  |                      |          |         |                      |          |         |                        |          |                 |
| <b>Age in years</b>                          |                      |          |         |                      |          |         | 1.16 ( 0.91 - 1.48 )   |          | 0.234           |
| <b>Education</b>                             |                      |          |         |                      |          |         |                        |          |                 |
| Never                                        |                      |          |         |                      |          |         | Ref.                   |          |                 |
| Primary and more                             |                      |          |         |                      |          |         |                        |          | Perfect success |
| <b>Religion</b>                              |                      |          |         |                      |          |         |                        |          |                 |
| Christian                                    |                      |          |         |                      |          |         | Ref.                   |          |                 |
| Muslim                                       |                      |          |         |                      |          |         |                        |          | Perfect success |
| <b>Wealth index</b>                          |                      |          |         |                      |          |         |                        |          |                 |
| Poor                                         |                      |          |         |                      |          |         | Ref.                   |          |                 |
| Middle                                       |                      |          |         |                      |          |         | 0.52 ( 0.01 - 18.81 )  |          | 0.724           |
| Rich                                         |                      |          |         |                      |          |         | 3.35 ( 0.16 - 70.01 )  |          | 0.435           |
| <b>No. of children</b>                       |                      |          |         |                      |          |         | 0.91 ( 0.26 - 3.14 )   |          | 0.875           |
| <b>Pregnancy intention</b>                   |                      |          |         |                      |          |         |                        |          |                 |
| No                                           |                      |          |         |                      |          |         | Ref.                   |          |                 |
| Yes                                          |                      |          |         |                      |          |         | 0.03 ( 0.00 - 1.50 )   |          | 0.080           |
| Don't know                                   |                      |          |         |                      |          |         |                        |          | Perfect success |
| <b>Partner's pregnancy intention</b>         |                      |          |         |                      |          |         |                        |          |                 |
| No                                           |                      |          |         |                      |          |         | Ref.                   |          |                 |
| Yes                                          |                      |          |         |                      |          |         | 2.83 ( 0.08 - 103.69 ) |          | 0.571           |
| Don't know                                   |                      |          |         |                      |          |         |                        |          | Perfect success |
| <b>History of unintended pregnancy</b>       |                      |          |         |                      |          |         |                        |          |                 |
| No                                           |                      |          |         |                      |          |         | Ref.                   |          |                 |
| Yes                                          |                      |          |         |                      |          |         | 0.90 ( 0.07 - 11.55 )  |          | 0.938           |
| <b>Multiple sex partners</b>                 |                      |          |         |                      |          |         |                        |          |                 |
| No                                           |                      |          |         |                      |          |         | Ref.                   |          |                 |
| Yes                                          |                      |          |         |                      |          |         |                        |          | Collinearity    |
| <b>2) HIV-related characteristics</b>        |                      |          |         |                      |          |         |                        |          |                 |
| <b>HIV status</b>                            |                      |          |         |                      |          |         |                        |          |                 |
| Negative                                     |                      |          |         |                      |          |         | Ref.                   |          |                 |
| Positive                                     |                      |          |         |                      |          |         |                        |          | Perfect success |
| <b>Partner's HIV status</b>                  |                      |          |         |                      |          |         |                        |          |                 |
| Negative                                     |                      |          |         |                      |          |         | Ref.                   |          |                 |
| Positive                                     |                      |          |         |                      |          |         | 7.37 ( 0.28 - 191.75 ) |          | 0.230           |
| Don't know                                   |                      |          |         |                      |          |         |                        |          | Perfect success |
| <b>HIV/STI risk perception</b>               |                      |          |         |                      |          |         |                        |          |                 |
| No risk at all                               |                      |          |         |                      |          |         | Ref.                   |          |                 |
| Small                                        |                      |          |         |                      |          |         | 0.60 ( 0.05 - 7.82 )   |          | 0.695           |
| Moderate                                     |                      |          |         |                      |          |         | 0.09 ( 0.00 - 2.61 )   |          | 0.160           |
| Great                                        |                      |          |         |                      |          |         |                        |          | Perfect success |
| <b>3) HEC use</b>                            |                      |          |         |                      |          |         |                        |          |                 |
| <b>Type of HECs</b>                          |                      |          |         |                      |          |         |                        |          |                 |
| Injectables                                  |                      |          |         |                      |          |         | Ref.                   |          |                 |
| Implants                                     |                      |          |         |                      |          |         | 5.53 ( 0.57 - 53.68 )  |          | 0.140           |
| IUDs                                         |                      |          |         |                      |          |         |                        |          | Perfect success |
| OCPs                                         |                      |          |         |                      |          |         |                        |          | Perfect success |
| Female sterilization                         |                      |          |         |                      |          |         |                        |          | Perfect success |
| <b>4) Other psychosocial characteristics</b> |                      |          |         |                      |          |         |                        |          |                 |
| <b>HIV-related knowledge (HIV-KQ-18)</b>     |                      |          |         |                      |          |         | 0.97 ( 0.60 - 1.57 )   |          | 0.892           |
| <b>Condom use self-efficacy scale</b>        |                      |          |         |                      |          |         | 0.89 ( 0.78 - 1.01 )   |          | 0.075           |
| <b>Sexual Relationship Power Scale</b>       |                      |          |         |                      |          |         |                        |          |                 |
| Low                                          |                      |          |         |                      |          |         | Ref.                   |          |                 |
| Medium                                       |                      |          |         |                      |          |         | 0.01 ( 0.00 - 2.11 )   |          | 0.095           |
| High                                         |                      |          |         |                      |          |         | 2.62 ( 0.27 - 25.85 )  |          | 0.409           |

OR: odds ratio; AOR: adjusted odds ratio; SD: standard deviation; HEC: highly effective contraceptive; IUD: intrauterine device; OCP: oral contraceptive pill

a. Adjusted for the cluster effect and individuals

b. Adjusted for age, education, religion, wealth index, number of children, pregnancy intention, partner's pregnancy intention, history of unintended pregnancy, multiple sex partnership, HIV status, partner's HIV status, HIV/STI risk perception, HIV-related knowledge, condom use self-efficacy, and sexual relationship control power.

**Table S16.** Effects of intervention on the incidence of pregnancy among women at 4 months after enrollement

| Variables                                   | Model 1              |          |         | Model 2              |          |         | Model 3               |          |                 |
|---------------------------------------------|----------------------|----------|---------|----------------------|----------|---------|-----------------------|----------|-----------------|
|                                             | OR                   | (95% CI) | p-value | AOR <sup>a</sup>     | (95% CI) | p-value | AOR <sup>b</sup>      | (95% CI) | p-value         |
| <b>Intervention</b>                         |                      |          |         |                      |          |         |                       |          |                 |
| Control                                     | Ref.                 |          |         | Ref.                 |          |         | Ref.                  |          |                 |
| Intervention                                | 0.47 ( 0.08 - 2.56 ) |          | 0.380   | 0.47 ( 0.08 - 2.56 ) |          | 0.380   | 0.23 ( 0.00 - 17.34 ) |          | 0.504           |
| <b>1) Socio-demographic characteristics</b> |                      |          |         |                      |          |         |                       |          |                 |
| <b>Age in years</b>                         |                      |          |         |                      |          |         | 0.85 ( 0.53 - 1.36 )  |          | 0.499           |
| <b>Education</b>                            |                      |          |         |                      |          |         |                       |          |                 |
| Never                                       |                      |          |         |                      |          |         | Ref.                  |          |                 |
| Primary and more                            |                      |          |         |                      |          |         |                       |          | Perfect success |
| <b>Religion</b>                             |                      |          |         |                      |          |         |                       |          |                 |
| Christian                                   |                      |          |         |                      |          |         | Ref.                  |          |                 |
| Muslim                                      |                      |          |         |                      |          |         |                       |          | Perfect success |
| <b>Wealth index</b>                         |                      |          |         |                      |          |         |                       |          |                 |
| Poor                                        |                      |          |         |                      |          |         | Ref.                  |          |                 |
| Middle                                      |                      |          |         |                      |          |         | 0.12 ( 0.00 - 5.79 )  |          | 0.281           |
| Rich                                        |                      |          |         |                      |          |         |                       |          | Perfect success |
| <b>No. of children</b>                      |                      |          |         |                      |          |         | 1.08 ( 0.25 - 4.61 )  |          | 0.917           |
| <b>Pregnancy intention</b>                  |                      |          |         |                      |          |         |                       |          |                 |
| No                                          |                      |          |         |                      |          |         | Ref.                  |          |                 |
| Yes                                         |                      |          |         |                      |          |         | 0.03 ( 0.00 - 21.12 ) |          | 0.287           |
| Don't know                                  |                      |          |         |                      |          |         | 0.05 ( 0.00 - 25.14 ) |          | 0.339           |
| <b>Partner's pregnancy intention</b>        |                      |          |         |                      |          |         |                       |          |                 |
| No                                          |                      |          |         |                      |          |         | Ref.                  |          |                 |
| Yes                                         |                      |          |         |                      |          |         | 0.24 ( 0.00 - 33.85 ) |          | 0.572           |
| Don't know                                  |                      |          |         |                      |          |         |                       |          | Perfect success |
| <b>History of unintended pregnancy</b>      |                      |          |         |                      |          |         |                       |          |                 |
| No                                          |                      |          |         |                      |          |         | Ref.                  |          |                 |
| Yes                                         |                      |          |         |                      |          |         | 2.44 ( 0.08 - 70.08 ) |          | 0.603           |
| <b>Multiple sex partners</b>                |                      |          |         |                      |          |         |                       |          |                 |
| No                                          |                      |          |         |                      |          |         | Ref.                  |          |                 |
| Yes                                         |                      |          |         |                      |          |         |                       |          | Perfect success |
| <b>2) HIV-related characteristics</b>       |                      |          |         |                      |          |         |                       |          |                 |
| <b>HIV status</b>                           |                      |          |         |                      |          |         |                       |          |                 |
| Negative                                    |                      |          |         |                      |          |         | Ref.                  |          |                 |
| Positive                                    |                      |          |         |                      |          |         |                       |          | Perfect success |
| <b>Partner's HIV status</b>                 |                      |          |         |                      |          |         |                       |          |                 |
| Negative                                    |                      |          |         |                      |          |         | Ref.                  |          |                 |
| Positive                                    |                      |          |         |                      |          |         |                       |          | Perfect success |
| Don't know                                  |                      |          |         |                      |          |         |                       |          | Perfect success |
| <b>HIV/STI risk perception</b>              |                      |          |         |                      |          |         |                       |          |                 |
| No risk at all                              |                      |          |         |                      |          |         | Ref.                  |          |                 |
| Small                                       |                      |          |         |                      |          |         | 0.27 ( 0.01 - 6.94 )  |          | 0.428           |
| Moderate                                    |                      |          |         |                      |          |         | 0.99 ( 0.05 - 20.41 ) |          | 0.995           |
| Great                                       |                      |          |         |                      |          |         |                       |          | Perfect success |
| <b>3) HEC use</b>                           |                      |          |         |                      |          |         |                       |          |                 |
| <b>Type of HECs</b>                         |                      |          |         |                      |          |         |                       |          |                 |
| Injectables                                 |                      |          |         |                      |          |         | Ref.                  |          |                 |
| Implants                                    |                      |          |         |                      |          |         | 0.15 ( 0.01 - 3.28 )  |          | 0.230           |
| IUDs                                        |                      |          |         |                      |          |         |                       |          | Perfect success |
| OCPs                                        |                      |          |         |                      |          |         | 0.83 ( 0.02 - 39.73 ) |          | 0.925           |
| Female sterilization                        |                      |          |         |                      |          |         |                       |          | Collinearity    |
| <b>4) Other psychosocial charactericts</b>  |                      |          |         |                      |          |         |                       |          |                 |
| <b>HIV-related knowledge (HIV-KQ-18)</b>    |                      |          |         |                      |          |         | 0.87 ( 0.55 - 1.37 )  |          | 0.546           |
| <b>Condom use self-efficacy scale</b>       |                      |          |         |                      |          |         | 1.06 ( 0.91 - 1.24 )  |          | 0.463           |
| <b>Sexual Relationship Power Scale</b>      |                      |          |         |                      |          |         |                       |          |                 |
| Low                                         |                      |          |         |                      |          |         | Ref.                  |          |                 |
| Medium                                      |                      |          |         |                      |          |         | 0.36 ( 0.01 - 9.92 )  |          | 0.547           |
| High                                        |                      |          |         |                      |          |         | 0.72 ( 0.03 - 16.84 ) |          | 0.840           |

OR: odds ratio; AOR: adjusted odds ratio; SD: standard deviation; HEC: highly effective contraceptive; IUD: intrauterine device; OCP: oral contraceptive pill

a. Adjusted for the cluster effect and individuals

b. Adjusted for age, education, religion, wealth index, number of children, pregnancy intention, partner's pregnancy intention, history of unintended pregnancy, multiple sex partnership, HIV status, partner's HIV status, HIV/STI risk perception, HIV-related knowledge, condom use self-efficacy, and sexual relationship control power.

**Table S17.** Effects of intervention on the incidence of pregnancy among women at 8 months after enrollement

| Variables                                   | Model 1              |          |         | Model 2              |          |         | Model 3                |          |                 |
|---------------------------------------------|----------------------|----------|---------|----------------------|----------|---------|------------------------|----------|-----------------|
|                                             | OR                   | (95% CI) | p-value | AOR <sup>a</sup>     | (95% CI) | p-value | AOR <sup>b</sup>       | (95% CI) | p-value         |
| <b>Intervention</b>                         |                      |          |         |                      |          |         |                        |          |                 |
| Control                                     | Ref.                 |          |         | Ref.                 |          |         | Ref.                   |          |                 |
| Intervention                                | 0.38 ( 0.07 - 1.96 ) |          | 0.246   | 0.38 ( 0.07 - 2.19 ) |          | 0.281   | 0.40 ( 0.02 - 8.19 )   |          | 0.552           |
| <b>1) Socio-demographic characteristics</b> |                      |          |         |                      |          |         |                        |          |                 |
| <b>Age in years</b>                         |                      |          |         |                      |          |         | 0.85 ( 0.64 - 1.13 )   |          | 0.263           |
| <b>Education</b>                            |                      |          |         |                      |          |         |                        |          |                 |
| Never                                       |                      |          |         |                      |          |         | Ref.                   |          |                 |
| Primary and more                            |                      |          |         |                      |          |         |                        |          | Perfect success |
| <b>Religion</b>                             |                      |          |         |                      |          |         |                        |          |                 |
| Christian                                   |                      |          |         |                      |          |         | Ref.                   |          |                 |
| Muslim                                      |                      |          |         |                      |          |         |                        |          | Perfect success |
| <b>Wealth index</b>                         |                      |          |         |                      |          |         |                        |          |                 |
| Poor                                        |                      |          |         |                      |          |         | Ref.                   |          |                 |
| Middle                                      |                      |          |         |                      |          |         | 0.08 ( 0.01 - 1.14 )   |          | 0.062           |
| Rich                                        |                      |          |         |                      |          |         |                        |          | Perfect success |
| <b>No. of children</b>                      |                      |          |         |                      |          |         | 1.23 ( 0.40 - 3.83 )   |          | 0.716           |
| <b>Pregnancy intention</b>                  |                      |          |         |                      |          |         |                        |          |                 |
| No                                          |                      |          |         |                      |          |         | Ref.                   |          |                 |
| Yes                                         |                      |          |         |                      |          |         |                        |          | Perfect success |
| Don't know                                  |                      |          |         |                      |          |         |                        |          | Perfect success |
| <b>Partner's pregnancy intention</b>        |                      |          |         |                      |          |         |                        |          |                 |
| No                                          |                      |          |         |                      |          |         | Ref.                   |          |                 |
| Yes                                         |                      |          |         |                      |          |         |                        |          | Perfect success |
| Don't know                                  |                      |          |         |                      |          |         |                        |          | Perfect success |
| <b>History of unintended pregnancy</b>      |                      |          |         |                      |          |         |                        |          |                 |
| No                                          |                      |          |         |                      |          |         | Ref.                   |          |                 |
| Yes                                         |                      |          |         |                      |          |         | 0.92 ( 0.05 - 16.15 )  |          | 0.955           |
| <b>Multiple sex partners</b>                |                      |          |         |                      |          |         |                        |          |                 |
| No                                          |                      |          |         |                      |          |         | Ref.                   |          |                 |
| Yes                                         |                      |          |         |                      |          |         |                        |          | Perfect success |
| <b>2) HIV-related characteristics</b>       |                      |          |         |                      |          |         |                        |          |                 |
| <b>HIV status</b>                           |                      |          |         |                      |          |         |                        |          |                 |
| Negative                                    |                      |          |         |                      |          |         | Ref.                   |          |                 |
| Positive                                    |                      |          |         |                      |          |         | 6.80 ( 0.17 - 272.13 ) |          | 0.309           |
| <b>Partner's HIV status</b>                 |                      |          |         |                      |          |         |                        |          |                 |
| Negative                                    |                      |          |         |                      |          |         | Ref.                   |          |                 |
| Positive                                    |                      |          |         |                      |          |         |                        |          | Perfect success |
| Don't know                                  |                      |          |         |                      |          |         |                        |          | Perfect success |
| <b>HIV/STI risk perception</b>              |                      |          |         |                      |          |         |                        |          |                 |
| No risk at all                              |                      |          |         |                      |          |         | Ref.                   |          |                 |
| Small                                       |                      |          |         |                      |          |         | 2.90 ( 0.34 - 24.54 )  |          | 0.328           |
| Moderate                                    |                      |          |         |                      |          |         |                        |          | Collinearity    |
| Great                                       |                      |          |         |                      |          |         |                        |          | Perfect success |
| <b>3) HEC use</b>                           |                      |          |         |                      |          |         |                        |          |                 |
| <b>Type of HECs</b>                         |                      |          |         |                      |          |         |                        |          |                 |
| Injectables                                 |                      |          |         |                      |          |         | Ref.                   |          |                 |
| Implants                                    |                      |          |         |                      |          |         | 0.09 ( 0.00 - 2.08 )   |          | 0.133           |
| IUDs                                        |                      |          |         |                      |          |         |                        |          | Perfect success |
| OCPs                                        |                      |          |         |                      |          |         | 0.80 ( 0.04 - 16.43 )  |          | 0.885           |
| Female sterilization                        |                      |          |         |                      |          |         |                        |          | Perfect success |
| <b>4) Other psychosocial charactericts</b>  |                      |          |         |                      |          |         |                        |          |                 |
| <b>HIV-related knowledge (HIV-KQ-18)</b>    |                      |          |         |                      |          |         | 0.86 ( 0.56 - 1.34 )   |          | 0.507           |
| <b>Condom use self-efficacy scale</b>       |                      |          |         |                      |          |         | 0.92 ( 0.79 - 1.07 )   |          | 0.255           |
| <b>Sexual Relationship Power Scale</b>      |                      |          |         |                      |          |         |                        |          |                 |
| Low                                         |                      |          |         |                      |          |         | Ref.                   |          |                 |
| Medium                                      |                      |          |         |                      |          |         | 2.24 ( 0.15 - 34.45 )  |          | 0.564           |
| High                                        |                      |          |         |                      |          |         | 3.01 ( 0.08 - 113.51 ) |          | 0.552           |

OR: odds ratio; AOR: adjusted odds ratio; SD: standard deviation; HEC: highly effective contraceptive; IUD: intrauterine device; OCP: oral contraceptive pill

a. Adjusted for the cluster effect and individuals

b. Adjusted for age, education, religion, wealth index, number of children, pregnancy intention, partner's pregnancy intention, history of unintended pregnancy, multiple sex partnership, HIV status, partner's HIV status, HIV/STI risk perception, HIV-related knowledge, condom use self-efficacy, and sexual relationship control power.

Research protocol

**Positive deviance for dual-method promotion among women in rural Uganda**

Hodaka Kosugi  
Department of Community and Global Health  
School of International Health  
Graduate School of Medicine  
The University of Tokyo  
7-3-1 Hongo, Bunkyo-ku,  
113-0033, Tokyo, Japan  
Tel: +256-772-147034  
E-mail: [hodakos@m.u-tokyo.ac.jp](mailto:hodakos@m.u-tokyo.ac.jp)

## Supervisors

Masamine Jimba, Professor and Chair  
Department of Community and Global Health  
Graduate School of Medicine, The University of Tokyo

Conrad Muzoora, Lecturer and Research Fellow  
Department of medicine,  
Mbarara University of Science and Technology

## Research protocol

**DECLARATION**

I hereby declare that the proposal for the research entitled “Positive deviance for dual-method promotion among women in rural Uganda” is my original work and has not been presented for a degree in any other universities.

9 June 2019

小杉 穂高

---

Hodaka Kosugi, Ph.D. Candidate  
Department of Community and Global Health  
Graduate School of Medicine, The University of Tokyo  
hodakos@m.u-tokyo.ac.jp

|    |                                               |    |
|----|-----------------------------------------------|----|
| 1  |                                               |    |
| 2  |                                               |    |
| 3  |                                               |    |
| 4  |                                               |    |
| 5  |                                               |    |
| 6  |                                               |    |
| 7  |                                               |    |
| 8  | 1. <b>Introduction</b> .....                  | 4  |
| 9  | 1.1. <b>Background</b> .....                  | 4  |
| 10 | 1.2. Objectives.....                          | 5  |
| 11 | 2. <b>Methods</b> .....                       | 6  |
| 12 | 2.1. Study design.....                        | 6  |
| 13 | 2.2. Study area.....                          | 7  |
| 14 | 2.3. <b>Phase I</b> .....                     | 7  |
| 15 | 2.3.1 Study participants.....                 | 7  |
| 16 | 2.3.2 Sample size.....                        | 8  |
| 17 | 2.3.3 Sampling methods.....                   | 8  |
| 18 | 2.3.4. Data collection.....                   | 8  |
| 19 | 2.3.5. Compensation.....                      | 9  |
| 20 | 2.3.6. Data analysis plan.....                | 9  |
| 21 | 2.4. <b>Phase II</b> .....                    | 9  |
| 22 | 2.4.1 Study participants and recruitment..... | 9  |
| 23 | 2.4.2. Randomization.....                     | 9  |
| 24 | 2.4.3. Blinding.....                          | 10 |
| 25 | 2.4.4. Intervention.....                      | 10 |
| 26 | 2.4.5. Outcomes.....                          | 11 |
| 27 | 2.4.6. Other information.....                 | 11 |
| 28 | 2.4.7. Data collection.....                   | 11 |
| 29 | 2.4.8. Compensation.....                      | 12 |
| 30 | 2.4.9. Data analysis plan.....                | 12 |
| 31 | 2.4.10. Probable issues and management.....   | 12 |
| 32 | 3. <b>Ethical consideration</b> .....         | 12 |
| 33 | 4. <b>Funding</b> .....                       | 12 |
| 34 | 5. <b>Budget Plan</b> .....                   | 13 |
| 35 | Appendixes.....                               | 14 |
| 36 | References.....                               | 18 |
| 37 |                                               |    |
| 38 |                                               |    |
| 39 |                                               |    |
| 40 |                                               |    |
| 41 |                                               |    |
| 42 |                                               |    |
| 43 |                                               |    |
| 44 |                                               |    |
| 45 |                                               |    |
| 46 |                                               |    |
| 47 |                                               |    |
| 48 |                                               |    |
| 49 |                                               |    |
| 50 |                                               |    |
| 51 |                                               |    |
| 52 |                                               |    |
| 53 |                                               |    |
| 54 |                                               |    |
| 55 |                                               |    |
| 56 |                                               |    |
| 57 |                                               |    |
| 58 |                                               |    |
| 59 |                                               |    |
| 60 |                                               |    |

## Research protocol

## 1 Introduction

### 1.1 Background

In sub-Saharan Africa (SSA), women of reproductive age bear a disproportionate burden of unintended pregnancies and sexually transmitted infections (STIs) including HIV (1). In SSA, an estimated 35% of pregnancies are unintended (2). Moreover, women account for approximately 56% of all adults living with HIV in this region (3). This gender disparity starts when women reach their reproductive age, and women represent 59% of new HIV infections in this region (3, 4).

Unintended pregnancies occur because appropriate contraceptive methods are not available or avoided (5). To prevent this, highly effective contraceptives (HECs), such as hormonal contraceptives (e.g., pills, injectable, and implants), non-hormonal intrauterine device (IUD), and sterilization, were introduced to family planning programs (5). In many countries in SSA, women have started to use these methods more frequently during the past decades (6). HECs are effective in preventing unintended pregnancies but cannot prevent HIV/STIs (7). Therefore, women need to protect themselves from HIV/STIs, regardless of whether they are using HECs or not.

Dual protection is defined as a protection against the dual risks of unintended pregnancy and STIs including HIV (8). It can be accomplished by either using condoms consistently alone or with HECs (dual-method use) (8). Condoms are an effective method for women to prevent HIV/STIs from their sexual partners when being used correctly and consistently (9). However, as being often used incorrectly and inconsistently, condoms can only prevent 85% of pregnancies (10). Dual-method use, thus, has been recommended as the most reliable protection against the dual risks in couples who do not want a child or who want to delay childbirth (7, 8, 11, 12). Nevertheless, it remains uncommon (11). In the United States of America (USA), 7% of reproductive-age women who were sexually active used this method (13). In SSA, most research has focused on dual-method use among women living with HIV and adolescents. For instance, 16% and 39 % of women living with HIV practiced dual-method use in a three-month period in Ethiopia and Kenya, respectively (8, 14), while 7% of South African adolescents aged 15–24 years reported dual-method use (15).

Condom use is necessary for dual protection but not commonly practiced in SSA (9). Several barriers lessen their acceptability. For instance, women often cannot discuss condom use with their partners, as condoms are often perceived as a method for preventing HIV/STIs (8, 16, 17). Thus, condoms are often associated with infidelity and distrust within relationship in SSA (8, 16, 17). For this reason, condom use is not prevalent especially among women in a marital relationship. In Uganda, for example, only 2% of women used a condom with regular partners during the last sexual intercourse, while 37% used a condom with a non-regular partner (18).

Moreover, a trade-off between HEC and condom use is a barrier to practicing dual protection. Women are less likely to use condoms with their male partners when using HECs (19). Condom use may become unacceptable, especially in marital sex, as it is perceived as protection against HIV/STIs rather than pregnancies by using HECs. Both women and men may think condoms are unnecessary with an intimate partner, especially when women are using HECs (20). However, condom use is necessary for women who are at risk of HIV/STIs, regardless of HEC use (16). Extramarital sexual relationships are common, especially among men, in SSA (21). For instance, an estimated 44% of HIV infections occurred among married or cohabiting couples in Kenya (22).

A handful of interventions have been conducted to promote dual-method use in the USA (11). However, few interventions had a significant effect on dual-method use (11, 23), and effects of such interventions were often unsustainable (24). These interventions include computer-based training (24), clinic-based and phone call counseling (25), and a peer-leadership program (26, 27). In addition, one trial of multimedia component and counselling sessions is ongoing (28). Although people are at



## Research protocol

considerable risk of unintended pregnancies and HIV/ STIs, no interventions have been examined in resource-limited settings (11). Women and men may perceive the importance of condom use for preventing HIV/STIs, but often do not practice (29). Motivating factors for dual-method use remains unknown when the percentage of such users is low (29).

The positive deviance (PD) approach has the potential to address barriers to sensitive issues such as sexual and reproductive health. This approach seeks behaviors that contribute to otherwise high-risk individuals, or positive deviants, remaining free from a disease or condition and enable communities to adopt such behaviors (30, 31). This approach has addressed the complex development challenges, which are often hard for outsiders to measure, such as gender-related and sociocultural barriers (30). For example, the PD approach was applied to advocate against female genital mutilation using actual words of positive deviants in Egypt (30). Condom use is not prevalent in SSA, especially among married women using HECs. Barriers to condom use are complex and often difficult for outsiders to grasp the whole picture (32). Given limited effect of previous interventions, the PD approach can be an ideal option for promoting dual-method use (31). This study will examine the effect of an intervention formulated under the PD approach on dual-method use among women using HECs with their marital partners in rural Uganda.

To the best of my knowledge, this is the first study to use the PD approach to promote dual-method use. The finding of this study may contribute to increasing evidence on the effectiveness of the PD approach in tackling barriers for dual-method use. Furthermore, the results will be useful to public health policymakers to develop programs to reach women who need dual-method use and to reduce unintended pregnancies and HIV/STIs infections in Uganda.

## 1.2 Objectives

1. To examine factors associated with condom use among married women using HECs in an HIV-prevalent setting in Uganda.
2. To identify unique behaviors that are common only among married women who practice dual-method use with their partners.
3. To evaluate an intervention formulated under the positive deviance approach for promoting dual-method use among married women using HECs.

## Research protocol

## 2. Methods

### 2.1 Study design:

This study will examine whether a PD-led intervention is effective in promoting dual-method use among women who are using HECs with their marital partners. Steps in the positive deviance approach have been illustrated everywhere but adopted flexibly in practice (30, 33).

In this study, dual-method use is defined as the use of male or female condom along with HECs like pills, injectable, implants, male and female sterilization, and IUD consistently in the last two months (8).

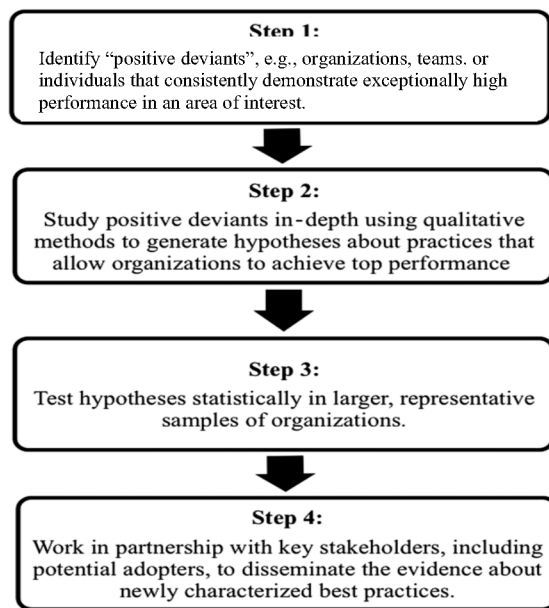

Steps in the positive deviance approach (33)

This study consists of two phases.

In **Phase I**, we will seek women who practice dual-method use with their marital partners (positive deviants) and conduct in-depth interviews to understand their intentional and unintentional behaviors and factors for dual-method use.

In **Phase II**, we will conduct a cluster randomized control trial (C-RCT) to test the effectiveness of the intervention formulated under the positive deviance approach for promoting dual-method use. The intervention will include clinic-based and phone counselling, a participatory learning workshop, and Information, Education and Communication (IEC) materials. They will be tailored based on the unique practice identified in Phase I.

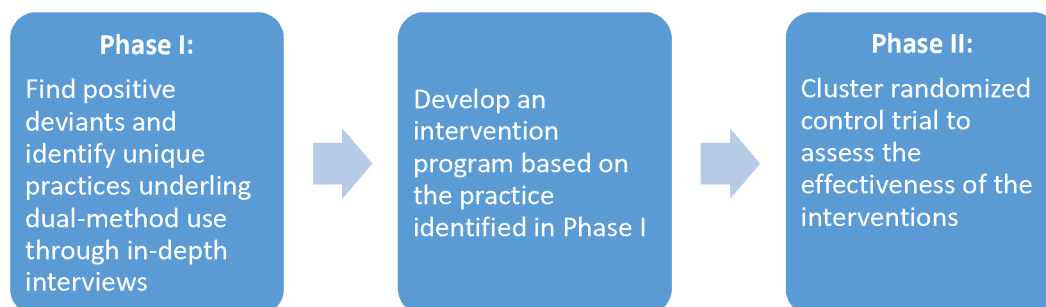

## 2.2 Study area:

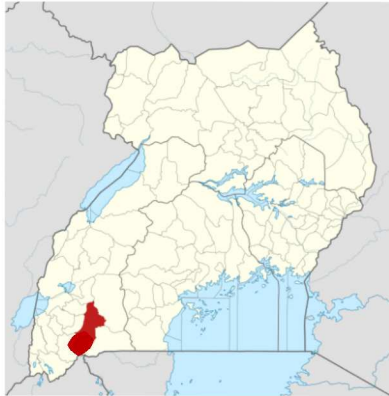

This study will be conducted in Mbarara district, South Western Uganda. Contraceptive use has significantly increased in Uganda. Its use among married women increased from 14% in 2001 to 35% in 2014 (18). Like other countries in SSA, HECs are getting the norm in Uganda, with 32% of currently married women using them in 2014 (18). Injectable is the most used method (19%) followed by implants (6%), female sterilization (3%), male condom (2%), pills (2%) and IUD (2%) (18). Despite the significant increase in contraceptive use, an estimated 44% of pregnancies were unintended in Uganda (34).

The HIV prevalence among adults 15–64 years is 6.2 and is higher among women (7.6%) than among men (4.7%) (35). The South-West region had the second highest HIV prevalence (7.9%) after the Central region (8.0%) in Uganda (35).

Mbarara district has one regional hospital, six general hospitals, four county-level health centers (health center IV), 14 sub-county-level health centers (health center III), 37 parish-level health centers (health center II). Among them, 48 are public health facilities, and 23 facilities are located in urban areas. Family planning service is provided for free at all the levels of health facilities. Male and female condoms are provided free by the Ministry of Health and by local and international nongovernmental organizations (18, 36). Condoms can also be purchased from supermarkets and pharmacies for USD 0.15 to USD 0.50 (36).

## 2.3 Phase I

In Phase I, positive deviants, or women practicing dual-method use, will be identified through health facility-based cross-sectional survey in selected five health facilities in Mbarara district, Uganda. Trained female research assistants will conduct face-to-face interviews with 150 women using a structured questionnaire. After the initial data collection, we will conduct in-depth interviews with all women who practiced dual-method use (positive deviants) and 10 women who used only HECs. The interviews will be conducted by trained female research assistants to identify unique behaviors underling dual-method use.

### 2.3.1 Study participants

To be eligible for joining in this study, participants should have the following characteristics:

- Women
- 18-49 years old
- Sexually active
- Using HECs at the time of recruitment
- Have a desire to avoid pregnancy for 12 months from recruitment
- Have a husband or live-in sexual partner
- Have access to a valid phone number

## Research protocol

Being sexually active is defined to have had sexual intercourse in the last three months prior to the study (14). Pregnant women and women who are infertile for other reasons will be excluded from this study. Health workers including community health workers, political and religious leaders, and teachers will also be excluded because they may not represent communities or be influenced by their occupations and social status. Existing assessment tools will be used to screen eligible participants, such as Uganda Demographic and Health Survey's questionnaire (18) and Behavioral Surveillance Surveys questionnaire (37).

In addition, male partners of women practicing dual-method use at the time of recruitment will be invited for in-depth interview. Male partners should be aged 18 years or older.

### 2.3.2 Sample size

One hundred fifty women will be interviewed. This is based on the assumption that at least 7% of women would practice dual-method use (15), and we could find at least 10 women who are considered as a positive deviant. All women who are identified as positive deviants will be invited for the in-depth interviews. For comparison, 10 women who do not practice dual-method use will be randomly selected for the in-depth interviews.

In addition, 5 male partners of women practicing dual-method use at the time of recruitment will be interviewed.

### 2.3.3 Sampling methods

Five health facilities will be selected purposively. Then, five trained female research assistants will approach female clients in the family planning sections of the selected health facilities. The first client will be selected randomly at each clinic, and then every third client will be informed about the opportunity to participate in this study. If they are interested in participating, the research assistants will ask screening questions using a pretested questionnaire to check their eligibility for the study. This process will be repeated until the required sample size is met.

### 2.3.4 Data collection

The five female trained research assistants will conduct face-to-face interviews using a pretested structured questionnaire with the participants. These interviews aim to identify women practicing dual-method use and their basic socio-demographic characteristics. Data collection items include basic socio-demographic characteristics, the types of HECs, the frequency of condom use in the past two months, and the histories of unintended pregnancies and diagnosed HIV/STIs. Women using both HECs and condom always will be regarded as practicing dual-method use. Dual-method users without no reported histories of unintended pregnancies and HIV/STIs will be considered as positive deviants. Then, in-depth qualitative interviews will be conducted by the research assistants with all positive deviants to identify their unique practice, such as effective communication for condom use that is actually working. Then, ten women who do not practice dual-method use are randomly selected for in-depth interviews. In addition, 5 male partners of women practicing dual-method use will be purposively selected and invited for in-depth interviews.

These in-depth interviews aim to verify if the practice identified in positive deviants is really unique. This interview will be open-ended, and an interview guide will be used. The interview guide focuses on the following domains: (1) perceptions of condom use and contraception, (2) reasons and motivations for condom use or nonuse, (3) negotiation and communication for condom use, and (4) risk perceptions for or unintended pregnancy and HIV/STIs.

## Research protocol

The data collection tools are first developed in English and then translated to Runyankore by a researcher. It is back-translated to English by a different researcher to ensure the accuracy of the translation. All interviews are conducted in either English or Runyankore. In-depth interviews will be audio recorded. Women who turned out not to meet the inclusion criteria during the in-depth interviews will be excluded from the analysis.

A pre-test of the interview guide will be conducted with five women purposively selected at a family planning clinic outside of the study area but in a similar setting.

### 2.3.5 Compensation

All the participants will be given some commodities worth of 10,000 UGX (equivalent to 3 USD) after the initial interview, and those who participated in the in-depth interview will receive 10,000 UGX for their time and transportation after the in-depth interviews.

### 2.3.6 Data analysis plan

All qualitative interview data will be transcribed and if not in English, translated from Runyankore into English by a researcher. Translated transcriptions will be compared with recorded data by another researcher to ensure their accuracy. Then, two researchers will read all the transcripts and code overarching themes using MAXQDA version 18. The two researchers will compare data between dual-method users and nonusers to identify problems and barriers to adapting dual-method use and how they were overcome by positive deviants with their unique practice.

## 2.4 Phase II

In Phase II, a C-RCT will be conducted to assess the effectiveness of an intervention formulated under the PD approach on dual-method use by comparing intervention and control groups. The intervention will consist of clinic-based and phone counselling, a participatory workshop and the distribution of IEC materials. All interventions will be tailored based on the unique practice identified in Phase I. The counselling and workshop will be conducted by positive deviants identified during Phase I.

### 2.4.1 Study participants and recruitment

#### Eligibility

The same inclusion criteria as Phase I will be used for this intervention study, but women practicing dual-method use in the last two months prior to the recruitment will be excluded. Any women will be given full right to withdraw from this trial at any time without giving a reason.

#### Sample size

The simple minimum sample size for this RCT is 588. It was calculated by using Open Epi version 3. The power of the study was set at 80%, and the significance level was set at 5%. For assumptions, data from a previous intervention research on the uptake of dual-method use in the USA (Odds ratio: 2.43 with a 95% CI of 1.03 to 2.43) was used (27). Then, an intraclass correlation coefficient (ICC) of 0.006 was considered (36, 37). The ICC was based on a clinic-based condom use intervention in SSA (37). The required minimum sample size was 760 after considering the ICC. Considering 26% dropout rate (24), 960 participants will be recruited (480 participants in each arm).

#### Sampling methods



## Research protocol

Women will be recruited for this study at 20 health facilities in Mbarara district. The 20 health facilities will be purposively selected, considering the size and rural/urban status. Then, the same sampling method as Phase I will be used to recruit eligible women at the health facilities. Eighty women will be recruited from each of hospitals and county-level health centers, 40 from each of sub-county-level health centers and parish-level health centers.

### 2.4.2 Randomization

To control contamination across individuals, the C-RCT approach will be adopted (38). The 20 health facilities will be stratified based on the level of health facilities and urban/rural status and randomized to an intervention (n = 10 facilities) or control arm (n = 10 facilities), using a computer random number generator. The participants will be given the intervention that the facilities they were recruited at were allocated to.

### 2.4.3 Blinding

Blinding is not feasible in this kind of educational intervention study (11).

### 2.4.4 Intervention

This trial aims to evaluate the effectiveness of an intervention for promoting dual-method uptake and adherence among married women using HECs. The intervention will consist of clinic-based and phone counselling, a participatory workshop and the distribution of IEC materials, developed based on the unique practice identified in Phase I.

On the day of enrollment, women in the intervention arm will receive dual-method counseling with a tool developed based on the practice identified in Phase I, in addition to regular family planning counseling using an existing counseling tool (39). The counseling will be conducted for 20-40 minutes by trained research assistants.

Two weeks after the enrollment, women in the intervention arm will be invited for a one-day participatory learning workshop (five hours) at the same health facilities where they are recruited. Women may decide whether to participate or not. The workshop will be facilitated by research assistants and positive deviants, using a training protocol developed after Phase I. It includes simulations and role-plays for successful communication to use a condom with their partners and a group discussion regarding family planning and HIV/STI risk.

Bimonthly telephone counseling and refresher training will be provided by the positive deviants three times (3, 5 and 7 months after the enrollment). It will take 10-20 minutes and aim to remind women of the risk of unintended pregnancies and HIV/STIs and strengthen their capacity to communicate to use a condom with their partners.

In contrast, women in the control group will be provided regular family planning by trained research assistants using the existing material tool on the day of enrollment (39). Moreover, they will receive bimonthly phone calls on family planning and HIV/STI risk by research assistants three times (3, 5 and 7 months after the enrollment).

Condoms will be provided for free, regardless of whether women belong to the intervention or control arm at the selected health facilities.

| Intervention                                                                                                                                                    | Control                                                                                                           |
|-----------------------------------------------------------------------------------------------------------------------------------------------------------------|-------------------------------------------------------------------------------------------------------------------|
| <ul style="list-style-type: none"> <li>• Regular family planning counseling +dual-method use counselling based on the practice identified in Phase I</li> </ul> | <ul style="list-style-type: none"> <li>• Regular family planning counseling using an existing material</li> </ul> |

## Research protocol

|                                                                                                                                                                                                                                                                                                            |                                                                                                                           |
|------------------------------------------------------------------------------------------------------------------------------------------------------------------------------------------------------------------------------------------------------------------------------------------------------------|---------------------------------------------------------------------------------------------------------------------------|
| <ul style="list-style-type: none"> <li>• One-day participatory learning workshops facilitated by research assistants and positive deviants</li> <li>• Bimonthly telephone counselling by positive deviants</li> <li>• Tailored IEC materials including narrative stories from positive deviants</li> </ul> | <ul style="list-style-type: none"> <li>• Bimonthly phone calls on various health topics by research assistants</li> </ul> |
|------------------------------------------------------------------------------------------------------------------------------------------------------------------------------------------------------------------------------------------------------------------------------------------------------------|---------------------------------------------------------------------------------------------------------------------------|

#### 2.4.5 Outcomes

##### **Primary: Dual-method selection and adherence**

The primary outcome is dual-method use in the last two months prior to each follow-up interview (8). The outcome measure combines two questions regarding the frequency of condom use and family planning use.

The frequency of condom use will be asked via an item: “With what frequency did you and your partner use a male or female condom during the past two months?” Women will answer this question using a four-point scale “every time,” “almost every time,” “sometimes,” and “never.” Only those who answered with “every time” will be considered as having consistent condom use.

Women will be asked if they have been using any family planning methods via an item: “Without counting condoms, have you been using another form of protection against pregnancy during the past two months?” Responses to these two questions will be used to construct the dual-method use outcome with the following categories:

- 1) Dual-method use (family planning and consistent condom use)
- 2) Family planning and inconsistent condom use
- 3) Single or no method use

##### **Self-reported first occurrence of pregnancy and STIs**

Self-reported pregnancy and STI history (chlamydia, gonorrhea, or trichomonas infection) in the last two months will be assessed via the following two items: “Have you been told by a health care provider that you got pregnant for the first time in the past 2 months?” and “Have you been told by a health care provider that you had any STIs such as chlamydia, gonorrhea, or trichomonas infection for the first time in the past 2 months?” (28, 40).

#### 2.4.6 Other information

The following information will be collected in the baseline interviews to conduct descriptive statistics and sub-group analysis and to identify factors associated with condom use: age, education, employment, rural/urban status, reproductive history, pregnancy intention, sexual history, STI history, substance use, domestic violence, current and past contraceptive practice, awareness of dual-method use, spousal communication on family planning, HIV status of participants and their partners, disclosure of HIV status, ART treatment status (24), HIV-related Knowledge (HIV-KQ-18) (41), perceived HIV infection risk (42), condom use self-efficacy (40), sexual relationship control (the Sexual Relationship Power Scale: SRPS) (43, 44), and women's perception of the social acceptability of contraception (45).

## Research protocol

**2.4.7 Data collection**

On the day of enrollment, all women will be interviewed using a structured questionnaire to identify basic baseline characteristics. Then, follow-up survey will be conducted by phone every two months for eight months to evaluate how the intervention influences on dual-method selection and adherence and pregnancy and STI incidence (2,4,6, and 8 months after the enrollment). After the intervention, 15 will be randomly selected from women who started practicing dual-method use and invited for in-depth interview. The in-depth interview aims to gather qualitative data to assess effects of the intervention and patients' feedback for the intervention.

All interview will be conducted by female research assistants using an interview guide. A pre-test of the questionnaire will be conducted among 5% (37 women) of the minimum sample size at a family planning clinic outside of the study area but in a similar setting. All data will be entered using EpiData software.

**2.4.8 Compensation**

All the participants will be given some commodities worth of 10,000 UGX (equivalent to 3 USD) for their time and participation in the study after the initial interviews. Participants who participated in the learning workshop and the in-depth interview will receive 20,000 UGX (equivalent to 6 USD) for transportation.

**2.4.9 Data analysis plan**

The background characteristics of women will be compared between the intervention and the control group using Pearson's chi-square or Fisher's exact tests. Multiple logistic regression analysis will be performed to access the effect of the intervention on the following outcomes: dual-method selection and adherence in the past 2 months before each follow-up data collection and self-reporting pregnancy and STIs in the past 2 months. Differences between the two groups at the baseline will be controlled as covariates in the analysis (46). Besides, sub-group analyses will be conducted among HIV-seroconcordant and-discordant couples. An intention-to-treat principle will be adopted for these analyses. Attrition rates and reasons for dropout will be compared between the two groups (47). The outcome data of those dropped out and lost to follow up will be excluded from the analyses. The significance level will be set at 5%. STATA version 13.1(College Station, Texas, USA) will be used for all data analyses.

**2.4.10 Probable issues and management**

This trial is expected to encounter a high proportion of participants lost to follow-up, which can cause significant biases and affect the power and validity of the RCT (28). Therefore, this study will reduce participants lost to follow up, by establishing and maintaining contact with participants on a monthly basis readdress of the intervention or the control group.

To mitigate the potential emergence of suspicions and domestic conflicts, all participants will be given a leaflet to inform the research objectives and procedures to their partners. Moreover, all telephone counseling and follow-up surveys will be conducted by trained female research assistants. Female research assistants will explain the research objectives and procedures to their partners based on request from participants whenever during the study period.

**3. Ethical consideration**

Participation in this study will be voluntary. Written consent will be obtained from all women who expressed willingness to participate in the study. Each interview will be taken in a confidential and



## Research protocol

secure environment. The entire data set will be recorded in an anonymous form and confidentiality will be assured.

Ethical approval will be obtained from the Research Ethics Committee of the Graduate School of Medicine, the University of Tokyo, Japan, the Institutional Research and Ethics Committee (MUST-REC) of Mbarara University of Science and Technology, Mbarara, Uganda and Uganda National Council of Science and Technology (UNCST), Kampala, Uganda. Moreover, written approvals will be obtained from each health facility under study.

### 4. Funding

This study will be supported by FASID Scholarship Program: Assistance for Higher Education.

### 5. Budget Plan

|                                                    | Person | Day/Month | Unit Cost (USD) | Total (USD) |
|----------------------------------------------------|--------|-----------|-----------------|-------------|
| <b>Ethical Review Fee</b>                          |        |           |                 |             |
| The University of Tokyo                            | -      | -         | 300             | 300         |
| Mbarara University of Science and Technology       | -      | -         | 300             | 300         |
| Uganda National Council for Science and Technology | -      | -         | 300             | 300         |
| <b>TOTAL</b>                                       |        |           |                 | 900         |
|                                                    | Person | Day/Month | Unit Cost (UGX) | Total (UGX) |
| <b>Phase I</b>                                     |        |           |                 |             |
| Allowance for Research Assistants                  | 5      | 10        | 30,000          | 1,500,000   |
| Transport for Research Assistants                  | 5      | 10        | 20,000          | 1,000,000   |
| Compensation for participants (initial interview)  | 150    | 1         | 10,000          | 1,500,000   |
| Compensation for participants (in-depth interview) | 20     | 1         | 10,000          | 200,000     |
| <b>Phase II (Baseline)</b>                         |        |           |                 |             |
| Allowance for Research Assistants                  | 5      | 20        | 30,000          | 3,000,000   |
| Transport for Research Assistants                  | 5      | 20        | 20,000          | 2,000,000   |
| Compensation for participants (including pre-test) | 997    | 1         | 10,000          | 4,985,000   |
| <b>Phase II (Follow UP)</b>                        |        |           |                 |             |
| Allowance for Research Assistants                  | 5      | 8         | 30,000          | 1,200,000   |
| Allowance for counselors (PD)                      | 10     | 8         | 30,000          | 2,400,000   |
| Communication                                      | 15     | 8         | 50,000          | 6,000,000   |

|                                 |     |    | Research protocol |               |
|---------------------------------|-----|----|-------------------|---------------|
| <b>Phase II (Workshop)</b>      |     |    |                   |               |
| Allowance for Facilitators (PD) | 3   | 20 | 30,000            | 1,800,000     |
| Transport for Facilitators (PD) | 3   | 20 | 20,000            | 1,200,000     |
| Transport for participants      | 480 | 1  | 20,000            | 9,600,000     |
| Printing IEC Materials          | 480 | 1  | 3,000             | 1,440,000     |
| TOTAL (UGX)                     |     |    |                   | 42,810,000    |
| TOTAL (USD)                     |     |    |                   | 10,977        |
| <b>GRAUND TOTAL (USD)</b>       |     |    |                   | <b>11,877</b> |

For peer review only

## Appendixes

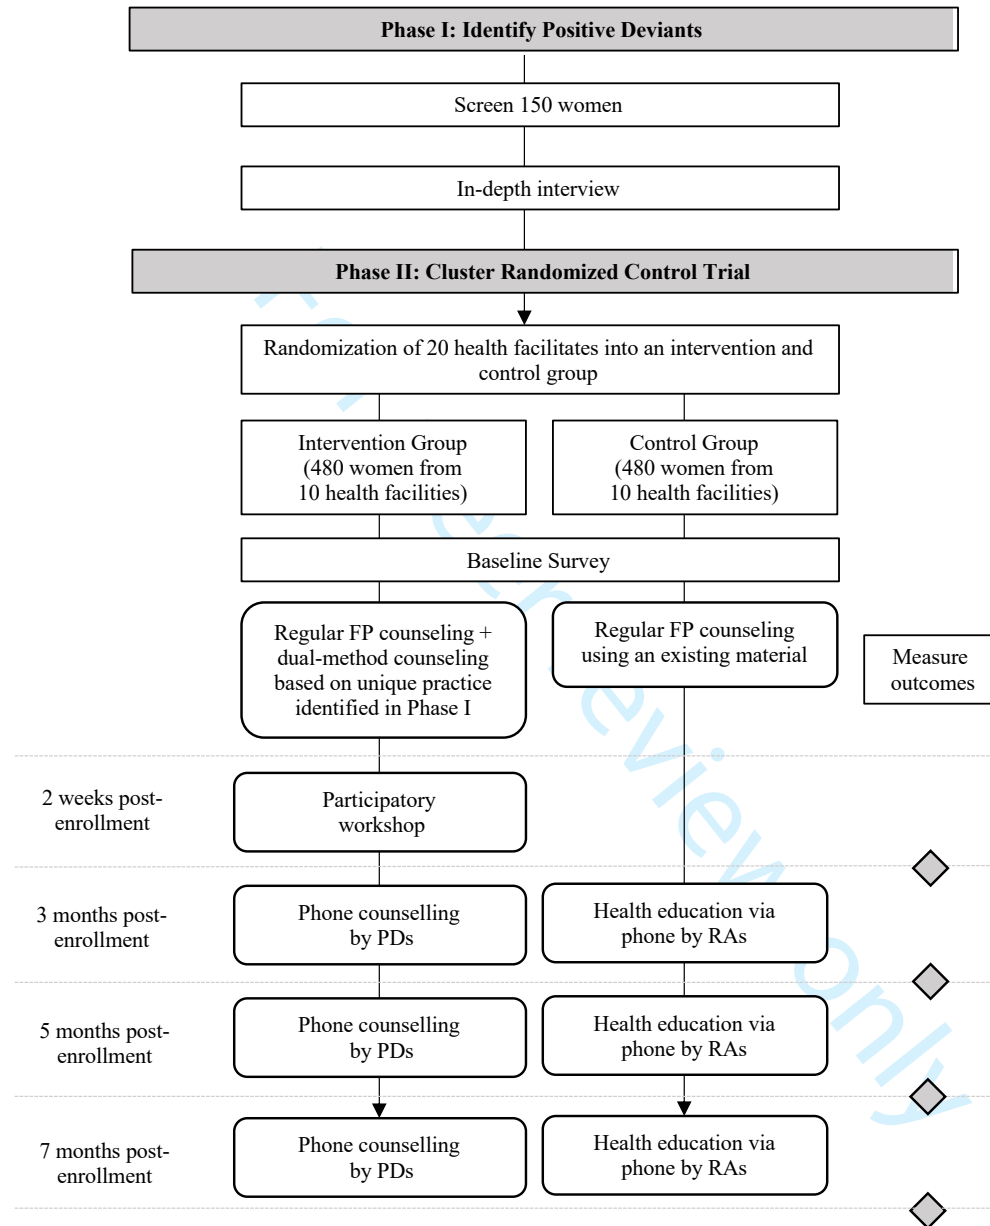

FP: Family Planning  
 PD: Positive Deviants  
 RA: Research Assistant

Fig. 1. Study Flow Chart

Research protocol

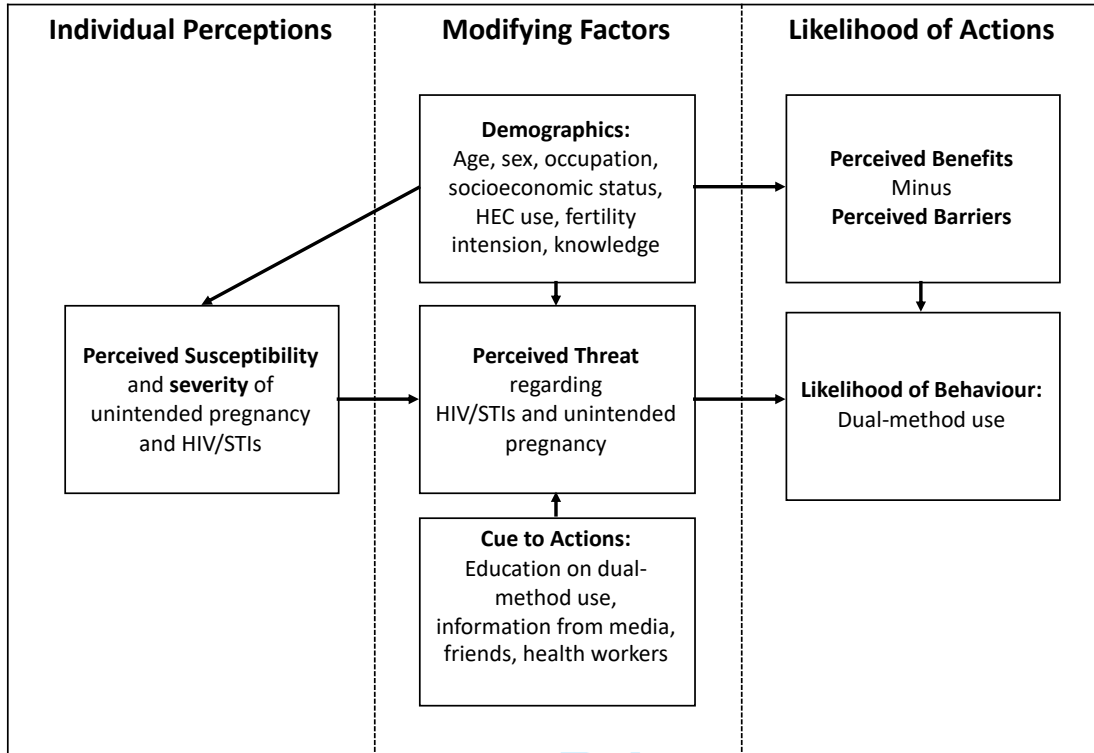

Figure 2. Conceptual Framework adapted and modified from Health Belief Model (32)

Research protocol

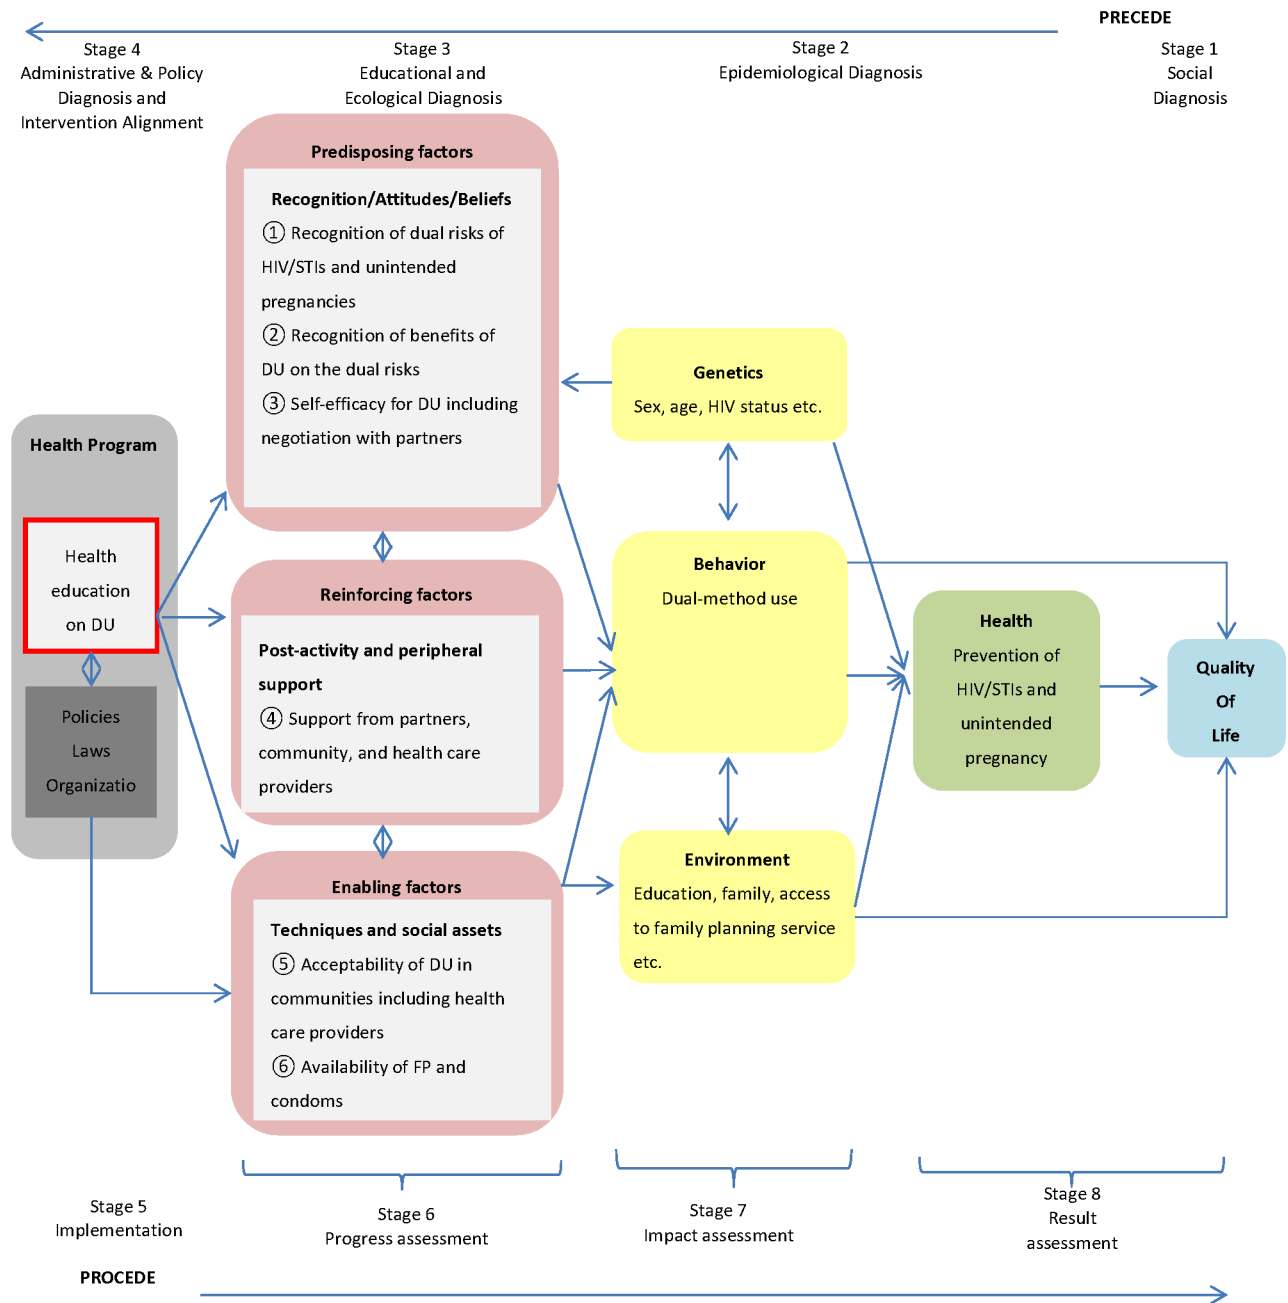

DU: Dual-method Use; FP: Family Planning

**Figure 3. Conceptual framework applying the planned intervention to PRECEDE-PROCEED Model (48)**



**References**

1. Karim SA, Baxter C, Frohlich J, Karim QA. The need for multipurpose prevention technologies in sub-Saharan Africa. *Bjog*. 2014;121 Suppl 5:27-34.
2. Sedgh G, Singh S, Hussain R. Intended and unintended pregnancies worldwide in 2012 and recent trends. *Stud Fam Plann*. 2014;45(3):301-14.
3. The Joint United Nations Programme on HIV and AIDS. UNAIDS Data 2018 Geneva: UNAIDS; 2018 [Available from: [https://www.unaids.org/sites/default/files/media\\_asset/unaids-data-2018\\_en.pdf](https://www.unaids.org/sites/default/files/media_asset/unaids-data-2018_en.pdf).]
4. Kharsany AB, Karim QA. HIV infection and AIDS in sub-Saharan Africa: current status, challenges and opportunities. *Open AIDS J*. 2016;10:34-48.
5. Hubacher D, Mavranzouli I, McGinn E. Unintended pregnancy in sub-Saharan Africa: magnitude of the problem and potential role of contraceptive implants to alleviate it. *Contraception*. 2008;78(1):73-8.
6. United Nations Department of Economic and Social Affairs Population Division. Trends in Contraceptive Use Worldwide 2015. New York: United Nations; 2015.
7. Pazol K, Kramer MR, Hogue CJ. Condoms for dual protection: patterns of use with highly effective contraceptive methods. *Public Health Rep*. 2010;125(2):208-17.
8. Gebrehiwot SW, Azeze GA, Robles CC, Adinew YM. Utilization of dual contraception method among reproductive age women on antiretroviral therapy in selected public hospitals of Northern Ethiopia. *Reprod Health*. 2017;14(1):125.
9. Maticka-Tyndale E. Condoms in sub-Saharan Africa. *Sex Health*. 2012;9(1):59-72.
10. Kraft JM, Galavotti C, Carter M, Jamieson DJ, Busang L, Fleming D, et al. Use of dual protection in Botswana. *Stud Fam Plann*. 2009;40(4):319-28.
11. Lopez LM, Stockton LL, Chen M, Steiner MJ, Gallo MF. Behavioral interventions for improving dual-method contraceptive use. *Cochrane Database Syst Rev*. 2014(3):Cd010915.
12. O'Leary A. Are dual-method messages undermining STI/HIV prevention? *Infect Dis Obstet Gynecol*. 2011;2011:691210.
13. Eisenberg DL, Allsworth JE, Zhao Q, Peipert JF. Correlates of dual-method contraceptive use: an analysis of the National Survey Of Family Growth (2006-2008). *Infect Dis Obstet Gynecol*. 2012;2012:717163.
14. Mulongo AM, Lihana RW, Githuku J, Gura Z, Karanja S. Factors associated with uptake of dual contraception among HIV-infected women in Bungoma County, Kenya: a cross-sectional study. *Pan Afr Med J*. 2017;28(Suppl 1):2.
15. MacPhail C, Pettifor A, Pascoe S, Rees H. Predictors of dual method use for pregnancy and HIV prevention among adolescent South African women. *Contraception*. 2007;75(5):383-9.
16. Williamson NE, Liku J, McLoughlin K, Nyamongo IK, Nakayima F. A qualitative study of condom use among married couples in Kampala, Uganda. *Reprod Health Matters*. 2006;14(28):89-98.
17. Cordero-Coma J. HIV prevention and marriage: peer group effects on condom use acceptability in rural Kenya. *Soc Sci Med*. 2014;116:169-77.
18. Uganda Bureau of Statistics. Uganda Demographic and Health Survey 2016. kampala: Uganda Bureau of Statistics; 2018.
19. Ott MA, Adler NE, Millstein SG, Tschann JM, Ellen JM. The trade-off between hormonal contraceptives and condoms among adolescents. *Perspect Sex Reprod Health*. 2002;34(1):6-14.
20. Kosugi H, Shibanuma A, Kiriya J, Wafula SW, Jimba M. Consistent condom use among highly effective contraceptive users in an HIV-endemic area in rural Kenya. *PLoS One*. 2019;14(5):e0216208.
21. Ramjee G, Daniels B. Women and HIV in sub-Saharan Africa. *AIDS Res Ther*. 2013;10(1):30-6405-10-30.
22. National Aids Control Council. Kenya HIV Estimates Report, 2015. Nairobi: NACC; 2016.

## Research protocol

23. El Ayadi AM, Rocca CH, Kohn JE, Velazquez D, Blum M, Newmann SJ, et al. The impact of an IUD and implant intervention on dual method use among young women: Results from a cluster randomized trial. *Prev Med*. 2017;94:1-6.
24. Peipert JF, Zhao Q, Meints L, Peipert BJ, Redding CA, Allsworth JE. Adherence to dual-method contraceptive use. *Contraception*. 2011;84(3):252-8.
25. Berenson AB, Rahman M. A randomized controlled study of two educational interventions on adherence with oral contraceptives and condoms. *Contraception*. 2012;86(6):716-24.
26. Sieving RE, McRee AL, McMorris BJ, Beckman KJ, Pettingell SL, Bearinger LH, et al. Prime time: sexual health outcomes at 24 months for a clinic-linked intervention to prevent pregnancy risk behaviors. *JAMA Pediatr*. 2013;167(4):333-40.
27. Sieving RE, McMorris BJ, Beckman KJ, Pettingell SL, Secor-Turner M, Kugler K, et al. Prime Time: 12-month sexual health outcomes of a clinic-based intervention to prevent pregnancy risk behaviors. *J Adolesc Health*. 2011;49(2):172-9.
28. Ewing AC, Kottke MJ, Kraft JM, Sales JM, Brown JL, Goedken P, et al. 2GETHER - The Dual Protection Project: Design and rationale of a randomized controlled trial to increase dual protection strategy selection and adherence among African American adolescent females. *Contemp Clin Trials*. 2017;54:1-7.
29. Woodsong C, Koo HP. Two good reasons: women's and men's perspectives on dual contraceptive use. *Soc Sci Med*. 1999;49(5):567-80.
30. Marsh DR, Schroeder DG, Dearden KA, Sternin J, Sternin M. The power of positive deviance. *Bmj*. 2004;329(7475):1177-9.
31. Singhal A, Svenkerud PJ. Diffusion of Evidence-based Interventions or Practice-based Positive Deviations. *The Journal of Development Communication*. 2018;29(2):54-64.
32. Mutowo J, Kasu C. Barriers to use of dual protection among married women in a Suburban setting. *Nurs Health Sci*. 2015;4(2):51-7.
33. Baxter R, Taylor N, Kellar I, Lawton R. What methods are used to apply positive deviance within healthcare organisations? A systematic review. *BMJ Qual Saf*. 2016;25(3):190-201.
34. Jarolimova J, Kabakyenga J, Bennett K, Muyindike W, Kembabazi A, Martin JN, et al. Contraceptive use following unintended pregnancy among Ugandan women living with HIV. *PloS one*. 2018;13(10):e0206325.
35. World Health Organization. Uganda population-based HIV impact assessment: UPHIA 2016–2017. 2017.
36. Van Breukelen GJ, Candel MJ. Calculating sample sizes for cluster randomized trials: we can keep it simple and efficient! *Journal of clinical epidemiology*. 2012;65(11):1212-8.
37. Zhang J, Pals SL, Medley A, Nichols C, Bachanas P, van Zyl D, et al. Parameters for sample size estimation from a group-randomized HIV prevention trial in HIV clinics in sub-Saharan Africa. *AIDS and Behavior*. 2014;18(12):2359-65.
38. Hemming K, Eldridge S, Forbes G, Weijer C, Taljaard M. How to design efficient cluster randomised trials. *Bmj*. 2017;358:j3064.
39. World Health Organization, The INFO Project at the Johns Hopkins Bloomberg School of Public Health/Center for Communication Programs (JHU/CCP). Decision-making tool for family planning clients and providers Geneva and Baltimore: WHO and JHU/CCP; 2005 [Available from: [http://www.who.int/reproductive-health/family\\_planning/tool.html](http://www.who.int/reproductive-health/family_planning/tool.html).]
40. Shaweno D, Tekletsadik E. Validation of the condom use self-efficacy scale in Ethiopia. *BMC Int Health Hum Rights*. 2013;13:22.
41. Carey MP, Schroder KE. Development and psychometric evaluation of the brief HIV Knowledge Questionnaire. *AIDS education and prevention*. 2002;14(2):172-82.
42. Napper LE, Fisher DG, Reynolds GL. Development of the perceived risk of HIV scale. *AIDS Behav*. 2012;16(4):1075-83.



## Research protocol

- 1  
2  
3  
4 43. Pulerwitz J, Gortmaker SL, DeJong W. Measuring sexual relationship power in HIV/STD  
5 research. *Sex roles*. 2000;42(7-8):637-60.
- 6 44. Pulerwitz J, Mathur S, Woznica D. How empowered are girls/young women in their sexual  
7 relationships? Relationship power, HIV risk, and partner violence in Kenya. *PloS one*.  
8 2018;13(7):e0199733.
- 9 45. Samandari G, Speizer IS, O'Connell K. The role of social support and parity in contraceptive  
10 use in Cambodia. *Int Perspect Sex Reprod Health*. 2010;36(3):122-31.
- 11 46. Twisk J BL, Hoekstra T, Rijnhart J, Welten M, Heymans M,. Different ways to estimate  
12 treatment effects in randomised controlled trials. *Contemp Clin Trials Commun*. 2018;10:80-5.
- 13 47. Kolamunnage-Dona R, Powell C, Williamson PR. Modelling variable dropout in randomised  
14 controlled trials with longitudinal outcomes: application to the MAGNETIC study. *Trials*.  
15 2016;17(1):222.
- 16 48. Green L, Kreuter M. Health program planning: an educational and ecological approach. 4th edn  
17 New York. NY: McGraw-Hill. 2005.
- 18  
19  
20  
21  
22  
23  
24  
25  
26  
27  
28  
29  
30  
31  
32  
33  
34  
35  
36  
37  
38  
39  
40  
41  
42  
43  
44  
45  
46  
47  
48  
49  
50  
51  
52  
53  
54  
55  
56  
57  
58  
59  
60

# BMJ Open

## Positive deviance for promoting dual-method contraceptive use among women in Uganda: A cluster randomized controlled trial

|                                 |                                                                                                                                                                                                                                                                                                                                                                                                                                                                                                                                                                                                                                                                                                                                               |
|---------------------------------|-----------------------------------------------------------------------------------------------------------------------------------------------------------------------------------------------------------------------------------------------------------------------------------------------------------------------------------------------------------------------------------------------------------------------------------------------------------------------------------------------------------------------------------------------------------------------------------------------------------------------------------------------------------------------------------------------------------------------------------------------|
| Journal:                        | <i>BMJ Open</i>                                                                                                                                                                                                                                                                                                                                                                                                                                                                                                                                                                                                                                                                                                                               |
| Manuscript ID                   | bmjopen-2020-046536.R1                                                                                                                                                                                                                                                                                                                                                                                                                                                                                                                                                                                                                                                                                                                        |
| Article Type:                   | Original research                                                                                                                                                                                                                                                                                                                                                                                                                                                                                                                                                                                                                                                                                                                             |
| Date Submitted by the Author:   | 05-Jun-2021                                                                                                                                                                                                                                                                                                                                                                                                                                                                                                                                                                                                                                                                                                                                   |
| Complete List of Authors:       | Kosugi, Hodaka; The University of Tokyo, Department of Community and Global Health, Graduate School of Medicine<br>Shibanuma, Akira; The University of Tokyo, Department of Community and Global Health, Graduate School of Medicine<br>Kiriya, Junko; The University of Tokyo, Department of Community and Global Health, Graduate School of Medicine<br>Ong, Ken; The University of Tokyo, Department of Community and Global Health, Graduate School of Medicine<br>Mucunguzi, Stephen; UNICEF Uganda Country Office<br>Muzoora, Conrad; Mbarara University of Science and Technology, Department of Internal Medicine<br>Jimba, Masamine; The University of Tokyo, Department of Community and Global Health, Graduate School of Medicine |
| <b>Primary Subject Heading</b>: | Global health                                                                                                                                                                                                                                                                                                                                                                                                                                                                                                                                                                                                                                                                                                                                 |
| Secondary Subject Heading:      | HIV/AIDS, Sexual health, Public health                                                                                                                                                                                                                                                                                                                                                                                                                                                                                                                                                                                                                                                                                                        |
| Keywords:                       | Public health < INFECTIOUS DISEASES, HIV & AIDS < INFECTIOUS DISEASES, Epidemiology < INFECTIOUS DISEASES                                                                                                                                                                                                                                                                                                                                                                                                                                                                                                                                                                                                                                     |
|                                 |                                                                                                                                                                                                                                                                                                                                                                                                                                                                                                                                                                                                                                                                                                                                               |

SCHOLARONE™  
Manuscripts



I, the Submitting Author has the right to grant and does grant on behalf of all authors of the Work (as defined in the below author licence), an exclusive licence and/or a non-exclusive licence for contributions from authors who are: i) UK Crown employees; ii) where BMJ has agreed a CC-BY licence shall apply, and/or iii) in accordance with the terms applicable for US Federal Government officers or employees acting as part of their official duties; on a worldwide, perpetual, irrevocable, royalty-free basis to BMJ Publishing Group Ltd ("BMJ") its licensees and where the relevant Journal is co-owned by BMJ to the co-owners of the Journal, to publish the Work in this journal and any other BMJ products and to exploit all rights, as set out in our [licence](#).

The Submitting Author accepts and understands that any supply made under these terms is made by BMJ to the Submitting Author unless you are acting as an employee on behalf of your employer or a postgraduate student of an affiliated institution which is paying any applicable article publishing charge ("APC") for Open Access articles. Where the Submitting Author wishes to make the Work available on an Open Access basis (and intends to pay the relevant APC), the terms of reuse of such Open Access shall be governed by a Creative Commons licence – details of these licences and which [Creative Commons](#) licence will apply to this Work are set out in our licence referred to above.

Other than as permitted in any relevant BMJ Author's Self Archiving Policies, I confirm this Work has not been accepted for publication elsewhere, is not being considered for publication elsewhere and does not duplicate material already published. I confirm all authors consent to publication of this Work and authorise the granting of this licence.

1 **Title:** Positive deviance for promoting dual-method contraceptive use among women in  
2 Uganda: A cluster randomized controlled trial

3  
4 **Authors:** Hodaka Kosugi <sup>1</sup>, Akira Shibamura <sup>1</sup>, Junko Kiriya <sup>1</sup>, Ken Ing Cherng Ong <sup>1</sup>,  
5 Stephen Mucunguzi <sup>2</sup>, Conrad Muzoora <sup>3</sup> and Masamine Jimba <sup>1,\*</sup>

6  
7 **Author Affiliations:**

8 <sup>1</sup> Department of Community and Global Health, Graduate School of Medicine, The  
9 University of Tokyo, Tokyo, Japan

10 <sup>2</sup> UNICEF Uganda Country Office, Kampala, Uganda

11 <sup>3</sup> Department of Internal Medicine, Mbarara University of Science and Technology,  
12 Mbarara, Uganda

13  
14 **Corresponding Author:**

15 Professor Masamine Jimba; Department of Community and Global Health, Graduate School  
16 of Medicine, The University of Tokyo, 7-3-1 Hongo, Bunkyo-ku, Tokyo 113-0033, Japan;  
17 Tel.: +81-3-5841-3698; Email: [mjimba@m.u-tokyo.ac.jp](mailto:mjimba@m.u-tokyo.ac.jp).

18  
19 Word count (main text): 5,769

1  
2  
3 **20 Abstract**  
4  
5

6 **21 Objective** To examine the effects of a positive deviance intervention on dual-method  
7  
8  
9 **22** contraceptive use among married or in-union women.  
10

11 **23 Design** Open-label cluster randomized controlled trial.  
12  
13

14 **24 Setting** 20 health facilities in Mbarara District, Uganda.  
15  
16

17 **25 Participants** 960 married or in-union women aged 18–49 years using a non-barrier modern  
18  
19  
20 **26** contraceptive method.  
21

22 **27 Interventions** A combination of clinic- and telephone-based counseling and a one-day  
23  
24  
25 **28** participatory workshop, which were developed based on a preliminary qualitative study of  
26  
27  
28 **29** women practicing dual-method contraception.  
29

30 **30 Primary outcome measure** Dual-method contraceptive use which was measured in two  
31  
32  
33 **31** timeframes: its use at the last sexual intercourse and its consistent use in the two months prior  
34  
35 **32** to each follow-up. The outcome was measured based on participants' self-reports, and the  
36  
37 **33** effect of intervention was assessed using a mixed-effects logistic regression model.  
38  
39

40 **34 Results** More women in the intervention group used dual-method contraception at the last  
41  
42 **35** sexual intercourse at two months (AOR = 4.12; 95% CI 2.02–8.39) and eight months  
43  
44 **36** (AOR = 2.16; 95% CI 1.06–4.41) than in the control group. At four and six months, however,  
45  
46 **37** the proportion of dual-method contraceptive users was not significantly different between the  
47  
48 **38** two groups. Its consistent use was more prevalent in the intervention group than in the  
49  
50 **39** control group at two months (AOR = 14.53; 95% CI 3.63–58.13), and the intervention effect  
51  
52  
53 **40** lasted throughout the follow-up period.  
54  
55

56 **41 Conclusions** The positive deviance intervention increased dual-method contraceptive use  
57  
58  
59 **42** among women, and could be effective at reducing the dual risk of unintended pregnancies  
60

1  
2  
3 43 and HIV infections. This study demonstrated that the intervention targeting only women can  
4  
5 44 change behaviors of couples to practice dual-method contraception. Because women using  
6  
7 45 non-barrier modern contraceptives may be more reachable than men, interventions targeting  
8  
9 46 such women should be recommended.  
10  
11  
12

13 47 **Trial registration** UMIN-CTR Clinical Trial, UMIN000037065.  
14  
15

16 48 Word count (abstract): 291  
17  
18  
19  
20  
21  
22  
23  
24  
25  
26  
27  
28  
29  
30  
31  
32  
33  
34  
35  
36  
37  
38  
39  
40  
41  
42  
43  
44  
45  
46  
47  
48  
49  
50  
51  
52  
53  
54  
55  
56  
57  
58  
59  
60

For peer review only

## 49 **Strengths and limitations of this study**

- 50 • The outcomes were measured based on participants' self-reports and therefore subject  
51 to measurement errors because of recall and social desirability biases.
- 52 • Due to the small number of clusters, several characteristics of the participants were  
53 not balanced between the intervention and control groups.
- 54 • However, mixed-effects logistic regression analysis was performed by controlling the  
55 cluster effects and the differences in baseline characteristics to evaluate the  
56 intervention's effects.
- 57 • This intervention was developed using the positive deviance approach which aims to  
58 promote behaviors of individuals who have achieved rare success to other community  
59 members.
- 60 • Women who used dual-method contraception in the study area contributed the  
61 intervention's development and implementation as peer counselors.

62 Word count (Strengths and limitations of this study): 108

## 64 **Introduction**

65 Unintended pregnancy and human immunodeficiency virus (HIV) infection remain major  
66 public health concerns in sub-Saharan Africa (SSA). In SSA, almost 30% of pregnancies  
67 were unintended, whereas women accounted for 59% of an estimated 980,000 new HIV  
68 infections that occurred among adults in 2018.<sup>1,2</sup> Sexual intercourse is a major route of HIV  
69 transmission, and a significant gender disparity in HIV infection begins when women reach  
70 reproductive age.<sup>3</sup> Women contract HIV five to seven years of age earlier than men, and

1  
2  
3 71 women aged 15–24 years are 2.4 times more likely to become infected with HIV than their  
4  
5 72 male counterparts.<sup>2,4</sup> In SSA, therefore, women of reproductive age bear the dual burden of  
6  
7 73 unintended pregnancies and HIV.  
8  
9

10  
11 74 Dual-method contraceptive use has been proposed as an effective strategy for preventing  
12  
13 75 unintended pregnancies and sexually transmitted infections (STIs), including HIV.<sup>5</sup> It is  
14  
15 76 defined as the use of a non-barrier modern contraceptive method (e.g., injectables, implants,  
16  
17 77 oral contraceptive pills, intrauterine devices, and sterilization) in combination with a barrier  
18  
19 78 method, such as male or female condoms.<sup>5</sup> Despite the high incidence rate of HIV, dual-  
20  
21 79 method contraception is not commonly practiced in SSA, especially among women in long-  
22  
23 80 term relationships.<sup>5,6</sup> For instance, only 3.8% of married women in Zimbabwe used dual-  
24  
25 81 method contraception with their partners.<sup>6</sup> In South Africa, only 16.2% of married and  
26  
27 82 cohabiting women reported consistent condom use, and they faced several barriers to using  
28  
29 83 condoms, such as infidelity and distrust within relationships.<sup>7</sup> Furthermore, women in stable  
30  
31 84 relationships tend to prioritize non-barrier methods over barrier methods and are less likely to  
32  
33 85 use condoms when using other methods.<sup>8,9</sup> Although the majority of women understand that  
34  
35 86 condom use is critical for preventing HIV/STIs, they do not practice it.<sup>10</sup> Marital sexual  
36  
37 87 intercourse becomes one of the major routes of HIV infection because of inconsistent or no  
38  
39 88 condom use in SSA.<sup>11</sup>  
40  
41  
42  
43  
44  
45  
46

47 89 Several studies examined interventions for promoting dual-method contraceptive use.<sup>5</sup>  
48  
49 90 However, few showed a significant effect on the dual-method use, and their impact was often  
50  
51 91 unsustainable.<sup>12</sup> To our knowledge, the only intervention that demonstrated a continued effect  
52  
53 92 on the dual-method use over six months was a combination of case management and peer  
54  
55 93 leadership programs among adolescents in the United States of America (USA).<sup>13</sup> In SSA,  
56  
57 94 conditional lottery incentives increased dual-method use among South African women at  
58  
59  
60



1  
2  
3 95 three months but not at six months after the intervention.<sup>14</sup> Effectiveness of behavioral change  
4  
5 96 interventions on the dual-method use among married or in-union women remains lacking in  
6  
7  
8 97 SSA.<sup>5</sup>  
9

10  
11 98 Uganda is one of the countries most affected by the HIV epidemic, with an adult prevalence  
12  
13 99 (aged 15–64 years) of 6.2% in 2017.<sup>15</sup> Like other SSA countries, this rate was higher among  
14  
15 100 women (7.6%) than men (4.7%).<sup>15</sup> Uganda has marked a substantial increase in the use of  
16  
17 101 modern contraceptives.<sup>16</sup> The prevalence of such use has increased from 14% in 2001 to 35%  
18  
19 102 in 2016 among married or in-union women.<sup>16,17</sup> Non-barrier modern contraceptives are the  
20  
21 103 most popular methods, with 32% of currently married or in-union women of reproductive age  
22  
23 104 using them.<sup>17</sup> However, condom use remains low in Uganda, especially among women in  
24  
25 105 long-term relationships. That is, only 2% of women reported condom use with regular  
26  
27 106 partners during their last sexual intercourse.<sup>17</sup>  
28  
29  
30  
31  
32

33 107 The positive deviance approach is based on the premise that there are community members  
34  
35 108 who solve problems while many of their peers do not.<sup>18</sup> This approach seeks unique behaviors  
36  
37 109 of such exceptional people (positive deviants or PDs) and disseminates these behaviors to the  
38  
39 110 whole community through community-led and peer-based interventions.<sup>18,19</sup> We previously  
40  
41 111 conducted a qualitative study to examine the unique behaviors of PDs (i.e., women using  
42  
43 112 dual-method with marital or in-union partners) in Mbarara District, Uganda.<sup>20</sup> These PDs  
44  
45 113 successfully practiced dual-method contraception by initiating discussions, educating their  
46  
47 114 partners on sexual risks and condom use, and obtaining condoms.<sup>20</sup> In this study, we  
48  
49 115 examined the effectiveness of an intervention developed based on those findings to promote  
50  
51 116 dual-method contraceptive use among women in the same area.  
52  
53  
54  
55  
56  
57  
58  
59  
60

## 118 **Methods**

### 119 **Study design and settings**

120 A cluster randomized controlled trial was conducted for eight months (November 2019 to  
121 July 2020) in Mbarara District in Southwestern Uganda. The protocol of the trial has been  
122 previously published.<sup>21</sup> The population of Mbarara District is 472,629 (female = 50.6%; male  
123 = 49.4%), and about a half of the female population (45.7%) are estimated within the  
124 reproductive ages (15 - 49 years).<sup>22</sup>

125 The prevalence of HIV is geographically diverse in Uganda, and the Southwestern region has  
126 one of the highest prevalence rates of HIV at 7.9% among adults. This rate is higher among  
127 women (9.3%) than men (6.3%).<sup>15</sup> All public health facilities provide non-barrier modern  
128 contraceptives and male condoms free of charge. Male condoms are also available for  
129 purchase at pharmacies and markets for 0.15 to 0.50 United States dollars (USD).<sup>20</sup>

130 To recruit a sufficient number of participants, 20 facilities were purposively selected out of  
131 48 public health facilities in Mbarara District.<sup>23</sup> All health facilities at the sub-county level or  
132 above were selected followed by health facilities at the parish level, which had a high number  
133 of outpatients.<sup>23</sup> These facilities included one general hospital, three county-level health  
134 centers, 11 sub-county-level health centers, and five parish-level health centers. Among them,  
135 seven facilities were located in urban areas.<sup>23</sup>

### 136 **Study participants and enrollment**

137 The inclusion criteria were women (i) aged 18 to 49 years, (ii) having had sexual intercourse  
138 in the last three months, (iii) using non-barrier modern contraceptives, and who (iv) desire to  
139 avoid pregnancy for 12 months from recruitment, (v) have a husband or live-in sexual

1  
2  
3 140 partner, and (vi) have access to a valid phone number. The exclusion criteria were women  
4  
5 141 who were (i) pregnant, (ii) infertile for other reasons, and (iii) had been using condoms  
6  
7 142 consistently with a non-barrier modern contraceptive in the last two months before the  
8  
9 143 recruitment. The sample size of 960 was calculated based on the effect size of 2.43 reported  
10  
11 144 in a dual-method intervention trial in the USA, considering an intraclass correlation  
12  
13 145 coefficient of 0.006 and a 26% dropout rate.<sup>12,13,24</sup> The power of the study was set at 80%, and  
14  
15 146 the significance level was set at 5%. OpenEpi version 3 was used to calculate the sample size.  
16  
17  
18  
19  
20 147 Convenience sampling method was used to recruit study participants. Female research  
21  
22 148 assistants recruited women at the selected health facilities. They approached every third  
23  
24 149 woman visiting the family planning section at each facility to minimize selection bias and  
25  
26 150 informed them the opportunity to participate in the study. If a woman was interested, they  
27  
28 151 confirmed non-barrier modern contraceptive use with her family planning client record card  
29  
30 152 and asked questions to verify eligibility. The process was repeated until the required sample  
31  
32 153 size was reached.  
33  
34  
35  
36  
37

### 38 154 **Randomization and masking**

39  
40  
41 155 The 20 health facilities were stratified based on their level and urban or rural status. They  
42  
43 156 were then randomized to either intervention or control group with a 1:1 allocation ratio.  
44  
45 157 Then, 960 women were allocated to the intervention (n = 480) or control group (n = 480)  
46  
47 158 based on the facilities at which they were recruited. An independent researcher who was not  
48  
49 159 involved in the data collection or analysis carried out the allocation using computer-generated  
50  
51 160 random sequences. Blinding was not feasible in this study due to the nature of the  
52  
53 161 intervention. However, the research assistants who performed the outcome assessment were  
54  
55 162 not informed the intervention allocation.  
56  
57  
58  
59  
60

## 163 **Intervention**

164 The intervention was developed based on the results of the preliminary study of nine PDs  
165 conducted in Mbarara District, Uganda in October 2019.<sup>20</sup> The PDs were identified by  
166 screening 150 women using non-barrier modern contraceptives at five health facilities. Then,  
167 in-depth interviews were conducted with the PDs. Thematic analysis was performed using the  
168 positive deviance framework to identify the unique behaviors associated with dual-method  
169 contraceptive use. The findings of the study have been published.<sup>20</sup>

170 Out of the nine PDs, four joined the intervention as peer counselors, whereas the other five  
171 were unable to participate due to other commitments. The four PDs demonstrated dual-  
172 method contraceptive use at least two months before the screening. The mean age of the four  
173 PDs was 29.8 years (standard deviation [SD] 6.0 years).

174 Table 1 summarizes the intervention, which combined clinic- and phone-based counseling  
175 and a participatory workshop, to disseminate the unique practices of the PDs.<sup>20</sup> After the  
176 baseline interview on the day of enrollment, women received counseling focusing on dual-  
177 method contraception in addition to regular family planning counseling. Trained research  
178 assistants delivered the counseling for about 20 to 30 minutes. Women received the handout  
179 used during the counseling developed either in English or Runyankore and were encouraged  
180 to initiate discussions on dual-method contraceptive use with their partners. The handout  
181 included several quotes from the PDs, such as “If I tell him to use a condom suddenly before  
182 having sex, he may get surprised and angry... if he gets mad, it is difficult to keep discussing  
183 it. So, I brought up this sensitive topic when he seemed to be in a good mood.”<sup>20</sup>

184 After two weeks of enrollment, women in the intervention group were invited for a one-day  
185 participatory learning workshop at the same health facility where they were recruited.

1  
2  
3 186 Participation in the workshop was voluntary. The four PDs facilitated the workshop with  
4  
5 187 support from the research assistants. It included role-play exercises to enable women to  
6  
7 188 acquire successful communication skills for discussions with their partners, practice of male  
8  
9 189 condom use, and group discussions about the dual risk of unintended pregnancies and  
10  
11 190 HIV/STIs from their partners.  
12  
13  
14

15  
16 191 In addition, women in the intervention group received a bimonthly telephone counseling call  
17  
18 192 from the PDs three times (i.e., three, five, and seven months after enrollment). It aimed to  
19  
20 193 confirm women's dual-method contraceptive use and challenges, provide reminders  
21  
22 194 regarding the risk of unintended pregnancies and HIV/STIs, and strengthen their capacity to  
23  
24 195 communicate with their partners. In addition, the call included brief health education  
25  
26 196 messages on family planning and HIV/STI based on an existing tool.<sup>25</sup> Each PD provided the  
27  
28 197 same women with counseling each time to build rapport and ensure effective counseling.  
29  
30 198 Each counseling lasted for 15 to 30 minutes.  
31  
32  
33  
34

35 199 Women in the control group received family planning counseling, including dual-method  
36  
37 200 contraceptive use, from female research assistants for 10 to 20 minutes, using the existing  
38  
39 201 tool on the day of enrollment.<sup>25</sup> However, this group of women did not receive the handout.  
40  
41 202 Furthermore, the research assistants provided bimonthly health education three times (i.e.,  
42  
43 203 three, five, and seven months after enrollment) by phone. The topics were the same as those  
44  
45 204 for the intervention group. Each call lasted for about ten minutes.  
46  
47  
48  
49

50 205 Condoms were provided for free, regardless of the allocation at the selected health facilities.  
51  
52 206 Before providing the intervention, the research assistants received a two-day training on the  
53  
54 207 contents of the existing counseling tool. In addition, the four PDs received a one-day training  
55  
56 208 on counseling and ethics, including the confidentiality of their clients. The PDs joined the  
57  
58 209 intervention as volunteers but received 30,000 Ugandan Shillings (UGX) (equivalent to 9  
59  
60

1  
2  
3 210 USD) per day when they engaged in the workshop and the counseling to compensate for their  
4  
5 211 time and transportation.  
6  
7

8  
9 212 <Insert Table 1 here>  
10

## 11 213 **Outcomes**

12  
13  
14  
15  
16 214 The primary outcome was dual-method contraceptive use, which was defined as the  
17  
18 215 application of a male or female condom along with a non-barrier modern contraceptive  
19  
20 216 method.<sup>5</sup> It was measured in two timeframes: dual-method contraceptive use at the last sexual  
21  
22 217 intercourse and its consistent use in the last two months before each follow-up. The former is  
23  
24 218 easier for women to answer accurately than the latter, which requires to estimate the  
25  
26 219 frequency of condom use in the past.<sup>26</sup> Nevertheless, consistent dual-method contraceptive  
27  
28 220 use is critical, given that condoms are often used inconsistently.<sup>26</sup>  
29  
30

31  
32  
33 221 Three questions regarding non-barrier modern contraceptive use, condom use at the last  
34  
35 222 sexual intercourse, and its frequency in the past two months were combined to measure the  
36  
37 223 primary outcome. The following question was posed for non-barrier modern contraceptive  
38  
39 224 use: “Apart from condoms, have you been using any other forms of protection against  
40  
41 225 pregnancy during the past two months?” Condom use at the last sexual intercourse was  
42  
43 226 determined by asking, “Did you use a male or female condom the last time you had sexual  
44  
45 227 relations with your husband or live-in sexual partner?” Women who answered “yes” to both  
46  
47 228 questions were considered to be practicing dual-method contraceptive use at the last sexual  
48  
49 229 intercourse. The frequency of condom use was asked with an item: “How often did you and  
50  
51 230 your partner use a male or female condom during the past two months?” Women answered  
52  
53 231 this question using a four-point scale “every time,” “almost every time,” “sometimes,” and  
54  
55  
56  
57  
58  
59  
60

1  
2  
3 232 “never.” Women using a non-barrier modern contraceptive and a condom every time were  
4  
5 233 considered practicing consistent dual-method contraceptive use.  
6  
7  
8

9 234 **Other information**

10  
11  
12 235 The following information was collected at baseline: age, education, religion, employment,  
13  
14 236 wealth index based on the availability of 18 household assets, number of children,  
15  
16 237 respondent’s and partner’s pregnancy intention, history of unintended pregnancy, multiple  
17  
18 238 sex partnership, type of non-barrier modern contraceptives in use, respondent’s and partner’s  
19  
20 239 HIV status, risk perception of HIV/STIs, HIV-related knowledge (HIV-KQ-18),<sup>27</sup> condom  
21  
22 240 use self-efficacy,<sup>28</sup> and sexual relationship control power (the Sexual Relationship Power  
23  
24 241 Scale).<sup>29</sup>  
25  
26  
27  
28  
29

30 242 **Data collection**

31  
32  
33 243 All research assistants received a two-day training on data collection and ethics before the  
34  
35 244 baseline data collection. After enrollment, the research assistants interviewed women to  
36  
37 245 identify their baseline characteristics using a pre-tested structured questionnaire. Each  
38  
39 246 interview lasted approximately 30 to 45 minutes.  
40  
41  
42  
43 247 For outcome assessment, three female research assistants carried out follow-up phone calls  
44  
45 248 bimonthly for eight months to assess the influence of the intervention on the primary and  
46  
47 249 secondary outcomes (i.e., two, four, six, and eight months after enrollment). The participants  
48  
49 250 received a text message reminding them to answer the next call or call back if they missed the  
50  
51 251 first call. The assistants called each participant up to five times during each follow-up until  
52  
53 252 they answered. The participants received incentives worth 20,000 UGX (equivalent to 6  
54  
55 253 USD) for their time after the baseline interview.  
56  
57  
58  
59  
60

## 254 **Data analysis**

255 Chi-squared tests and independent sample t-tests were performed to compare the general  
256 characteristics between the intervention and control groups at baseline and follow-up. Mixed-  
257 effects logistic regression analysis was performed to assess the effects of the intervention on  
258 the primary and secondary outcomes. Unadjusted odds ratios (ORs) were first estimated by  
259 comparing between the control and intervention groups (Model 1). Then, in the main model  
260 (Model 2), the intervention effects were presented with adjusted odds ratios (AORs) for the  
261 interaction term (group  $\times$  time) after controlling for cluster effects for all health facilities and  
262 the individuals and baseline sociodemographic characteristics. The AORs can be interpreted  
263 as the difference between the intervention and control groups in the outcome measures  
264 between baseline and each follow-up point.

265 For sensitivity analyses, attrition rates and reasons for dropout were compared between the  
266 intervention and control groups using Pearson's chi-squared test. Moreover, differences in  
267 baseline characteristics were compared between women lost to follow-up and those who were  
268 reached. Analyses were conducted based on the intention-to-treat principle. Significance level  
269 was set at 5%. Data were entered using EpiData version 3, and the data processing and  
270 statistical analyses were performed using Stata version 14.

## 271 **Ethics**

272 Participation in this study was voluntary, and the participants provided written informed  
273 consent. The protocol was registered at UMIN-CTR Clinical Trial under identifier number  
274 UMIN000037065. The Consolidated Standards of Reporting Trials (CONSORT) checklist is  
275 available as Supplementary Table S1.

## 276 **Patient and public involvement**



1  
2  
3 277 The nine PDs were identified from the public, and four of them were involved in the design  
4  
5 278 and conduct of the intervention as peer counselors. Moreover, the female research assistants  
6  
7 279 were recruited from the study area and contributed to the intervention's development and  
8  
9 280 implementation. The findings of this study have been shared with them and Mbarara District  
10  
11 281 health authority.  
12  
13  
14  
15  
16 282  
17  
18  
19 283 **Results**  
20  
21  
22

### 23 284 **Participant flow**

24  
25  
26 285 Out of 1,956 women screened, 960 were eligible for the trial and allocated to the intervention  
27  
28 286 or control group (Figure 1). Of 480 women in the intervention group, 345 (71.9%) attended  
29  
30 287 the one-day workshop. Moreover, 385 (80.2%), 361 (75.2%), and 369 (76.9%) received  
31  
32 288 counseling at three, five, and seven months after enrollment, respectively.  
33  
34  
35

36  
37 289 The response rates to follow-up surveys ranged from 76.5% at two months to 82.3% at eight  
38  
39 290 months. Women in the intervention group were more likely to respond at two months (79.8%  
40  
41 291 vs. 73.1%,  $p = 0.015$ ) and four months (84.6% vs. 79.4%,  $p = 0.036$ ). The most of baseline  
42  
43 292 characteristics, however, were balanced between women lost to follow-up and those reached  
44  
45 293 in both intervention and control groups. Therefore, the risk of bias was estimated to be low.  
46  
47 294 No statistically significant differences were observed in the response rates between the two  
48  
49 295 groups at six and eight months. Supplementary Table 2 presents the results of the sensitivity  
50  
51 296 analysis.  
52  
53  
54  
55

56 297 <Insert Figure 1 here>  
57  
58  
59

### 60 298 **Participant characteristics**

299 Table 2 presents the sociodemographic characteristics of 960 women at baseline. The mean  
300 age was 30.1 (SD 6.7) years. The mean number of children was three (SD 1.8). Of 960 women,  
301 more than 70% completed primary education. Of all, 9% were HIV-positive, 7.6% had an HIV-  
302 positive partner, and 84.5% perceived a certain level of risk for HIV/STIs. Injectables were the  
303 most common family planning method, used by more than half of women (51.9%), followed  
304 by implants (31.6%). Characteristics were similar for the intervention and control groups with  
305 a few slight imbalances. Specifically, women in the control group were more likely to have  
306 primary or higher education (75.6% vs. 69.8%;  $p = 0.042$ ), be categorized into the rich quintile  
307 (37.7% vs. 28.3%;  $p = 0.008$ ), and have fewer children (mean: 2.9 vs. 3.2;  $p = 0.041$ ) and less  
308 HIV-related knowledge (mean: 11.3 vs. 11.9;  $p < 0.001$ ).

309 <Insert Table 2 here>

### 310 **Effect of the intervention**

311 Table 3 demonstrates the outcome data by intervention group and time. More women in the  
312 intervention than in the control group used dual-method contraception at the last sexual  
313 intercourse and consistently at each follow-up point. These differences were largest at two  
314 months (dual-method contraceptive use at last sexual intercourse: 42.6% vs. 13.8%;  
315  $p < 0.001$ ; consistent dual-method contraceptive use: 15.5% vs. 1.5%;  $p < 0.001$ ). The  
316 proportion of women practicing dual-method contraception in both time frames gradually  
317 decreased over time. At eight months, more women reported dual-method contraception use  
318 in the intervention group compared to the control group (dual-method contraceptive use at  
319 last sexual intercourse: 20.9% vs. 8.7%;  $p < 0.001$ ; consistent dual-method contraceptive use:  
320 11.2% vs. 1.3%;  $p < 0.001$ ).

321 <Insert Table 3 here>

1  
2  
3 322 Table 4 illustrates the effects of the intervention on the primary outcome among women at  
4  
5 323 two, four, six, and eight months after enrollment. In the main model, more women in the  
6  
7 324 intervention group reported dual-method contraceptive use at the last sexual intercourse than  
8  
9 325 in the control group at two months (AOR = 4.12; 95% CI 2.02–8.39,  $p < 0.001$ ). The  
10  
11 326 intervention group also reported more dual-method contraceptive use at the last sexual  
12  
13 327 intercourse at four, six, and eight months, although the difference was statistically significant  
14  
15 328 only at eight months (AOR = 2.16; 95% CI 1.06–4.41,  $p = 0.034$ ). Moreover, more women in  
16  
17 329 the intervention group practiced consistent dual-method contraceptive use than in the control  
18  
19 330 group at two months (AOR = 14.53; 95% CI 3.63–58.13,  $p < 0.001$ ). The intervention effect  
20  
21 331 remained statistically significant at four, six, and eight months.  
22  
23  
24  
25  
26

27 332 The baseline characteristics positively associated with dual-method contraceptive use at the  
28  
29 333 last sexual intercourse include self-efficacy for condom use and multiple sexual partnership.  
30  
31 334 The dual-method use was negatively associated with partner's pregnancy intention and  
32  
33 335 history of unintended pregnancy. HIV/STI risk perception was associated with its consistent  
34  
35 336 use at two months. The complete results are provided in Supplementary Tables S3-S10.  
36  
37  
38  
39

40 337 <Insert Table 4 here>  
41  
42  
43  
44

45 338

## 46 339 **Discussion**

47  
48  
49 340 The positive deviance intervention was effective in promoting the uptake and continued use of  
50  
51 341 dual-method contraception among women in long-term relationships who used non-barrier  
52  
53 342 modern contraceptives. The study observed the largest difference in the dual-method use  
54  
55 343 between the intervention and control groups at the two-month assessment, which was the  
56  
57 344 closest time point to the baseline counseling and workshop. The number of women using dual-  
58  
59  
60

1  
2  
3 345 method contraception decreased in the intervention and control groups over time, as observed  
4  
5 346 in previous studies.<sup>12</sup> However, the significant difference between the groups remained during  
6  
7 347 the follow-up period.  
8  
9

10  
11 348 The observed effect was consistent with a previous intervention study that combined case  
12  
13 349 management and peer education program for adolescent girls in the USA.<sup>13</sup> The intervention  
14  
15 350 illustrated continued effects on the dual-method use at 12 and 24 months after enrollment.<sup>13</sup>  
16  
17 351 The peer leadership program aimed to foster prosocial interaction skills and supportive peer  
18  
19 352 relationships among teenagers.<sup>13</sup> The peer supporters were not PDs and provided with intensive  
20  
21 353 standard training.<sup>13</sup> Effective communication with partners on sexual health was one of the key  
22  
23 354 topics covered in the sessions.<sup>13</sup> Similar to this, the current intervention provided bimonthly  
24  
25 355 counseling tailored to the participants' individual needs. However, it was provided by the PDs  
26  
27 356 who had overcome barriers to dual-method contraceptive use. Counseling by PDs may be an  
28  
29 357 alternative strategy because it ensures adequate attention to the diverse issues confronting  
30  
31 358 women and prosocial peer influence on their behaviors.  
32  
33  
34  
35  
36  
37

38 359 Few intervention studies have demonstrated an increase in dual-method contraceptive use,<sup>12-14</sup>  
39  
40 360 and adherence to such practice was frequently low.<sup>12</sup> Condom use is often considered a male  
41  
42 361 responsibility and unacceptable in long-term relationships in SSA, especially when women use  
43  
44 362 another contraceptive method.<sup>7,9,11,30</sup> The positive deviance intervention can be effective in  
45  
46 363 changing such norms. The PDs who overcame the barriers to dual-method contraceptive use  
47  
48 364 shared their experiences to help other women realize that condom use is normal even among  
49  
50 365 marital or in-union relationships.  
51  
52  
53

54  
55 366 Moreover, one of strong predictors of dual-method contraceptive use was self-efficacy for  
56  
57 367 condom use in this study. Self-efficacy for condom use was associated with actual dual-method  
58  
59 368 contraceptive use at the last sexual intercourse throughout the follow-up period. Similar  
60

1  
2  
3 369 association between self-efficacy and actual condom use was observed among Rwandan  
4  
5 370 adolescents.<sup>31</sup>Therefore, it is crucial to increase women's perceived capability of using  
6  
7 371 condoms skillfully and negotiating their use with partners. The positive deviance intervention  
8  
9 372 could empower women with the skills necessary to play a proactive role in negotiation and  
10  
11 373 condom use with their partners.

12  
13  
14  
15  
16 374 Condom use is not an individual action; therefore, a couple-level intervention would be ideal  
17  
18 375 to promote the dual-method use.<sup>12</sup> However, reaching out to male partners may be more  
19  
20 376 difficult compared to providing education to women visiting family planning clinics. This  
21  
22 377 study demonstrated that the intervention targeting only women is effective at changing  
23  
24 378 behaviors of couples to practice dual-method contraception. The finding supports the results of  
25  
26 379 a qualitative study of couples using condoms in Uganda; women were more likely to initiate  
27  
28 380 discussion and persuade their male partners to use condoms.<sup>32</sup> Considering that women who  
29  
30 381 use modern contraceptives visit health facilities presumably more often than men do, educating  
31  
32 382 them on dual-method contraception can be an effective strategy.

33  
34  
35  
36  
37  
38 383 Despite the increase in dual-method contraceptive use, it was practiced inconsistently,  
39  
40 384 especially among women in the control group. The result is consistent with findings of other  
41  
42 385 intervention studies in the USA and South Africa.<sup>12,14</sup> For instance, 32% of women at high  
43  
44 386 risk for unintended pregnancies and STIs initiated dual-method contraception after receiving  
45  
46 387 an individualized computer-based intervention, but only 9% reported its consistent use.<sup>12</sup> The  
47  
48 388 inconsistent use may explain the limited effects of dual-method contraception on preventing  
49  
50 389 STIs and unintended pregnancies in the former intervention studies in the USA.<sup>12,33</sup> However,  
51  
52 390 unintended pregnancy and STI incidences were significantly lower among HIV-infected  
53  
54 391 women practicing dual-method contraception compared to non-users in Nigeria.<sup>34</sup> The dual-  
55  
56 392 method use can be effective at reducing such risks if being practiced consistently. Although  
57  
58  
59  
60

1  
2  
3 393 this study did not measure HIV/STI incidence as an outcome, it is expected that the risk was  
4  
5 394 reduced among women who reported consistent dual-method contraceptive use.  
6  
7  
8

9 395 The study has several limitations. First, the study measured outcomes based on self-reports  
10  
11 396 from the participants. Therefore, it is subject to measurement errors. Especially, given the  
12  
13 397 information provided, dual-method contraceptive use could have been over-reported, which  
14  
15 398 can lead to overestimating the intervention effect. Nevertheless, over-reporting of outcomes  
16  
17 399 was minimized by assuring the participants of the confidentiality of their responses and  
18  
19 400 conducting interviews by experienced female research assistants. Second, we did not measure  
20  
21 401 HIV/STI incidence as an outcome. It is recommended to measure biological outcomes with  
22  
23 402 behavioral outcomes to evaluate dual-method contraceptive interventions in future research.  
24  
25 403 Lastly, this intervention was developed based on the qualitative study of the PDs in Mbarara  
26  
27 404 District and examined its effectiveness among women in the same area. Merely applying the  
28  
29 405 intervention to other communities might not be effective, as communities' local solutions  
30  
31 406 might differ.<sup>35</sup> Therefore, each community must participate in the process of determining its  
32  
33 407 own solutions. Further research is recommended to assess the effectiveness of the positive  
34  
35 408 deviance approach in a given context with careful attention to its process.  
36  
37  
38  
39  
40  
41  
42  
43  
44

## 45 410 **Conclusions**

46  
47  
48 411 The positive deviance intervention increased dual-method contraceptive use among married  
49  
50 412 or in-union women in Mbarara District, Uganda, by disseminating solutions that exist in the  
51  
52 413 community. This approach could be a potential option to reduce the dual risk of unintended  
53  
54 414 pregnancies and HIV/STIs among women. This study demonstrated that the intervention  
55  
56 415 targeting only women can change behaviors of couples to practice dual-method  
57  
58  
59  
60

1  
2  
3 416 contraception. Because women using non-barrier modern contraceptives may be more  
4  
5 417 reachable than men, interventions targeting such women should be recommended.  
6  
7  
8

9 418

10  
11  
12 419 **Footnotes**

13  
14  
15 420 **Acknowledgements:** The authors would like to thank all participants for their time and  
16  
17 421 cooperation and extend their appreciation to the women joined in the trial as PDs and the  
18  
19 422 research assistants.  
20  
21

22 423 **Contributors:** HK and MJ conceived the study and contributed to funding acquisition. HK,  
23  
24 424 AS, JK, KICO, and MJ contributed to the study design. HK conducted the literature review.  
25  
26 425 HK, CM, and SM led the development of the data collection instrument, data collection, and  
27  
28 426 quality assessment. HK and AS did the statistical analysis. All authors contributed to data  
29  
30 427 interpretation. HK wrote the original draft. AS, JK, KICO, SM, CM, and MJ reviewed and  
31  
32 428 revised the manuscript. All authors approved the final version for submission.  
33  
34  
35

36 429 **Funding:** HK received scholarship grant from Foundation for Advanced Studies on  
37  
38 430 International Development (FASID), Tokyo, Japan.  
39  
40  
41

42 431 **Disclaimer:** The funding source had no role in the design and conduct of this study. S.M. works  
43  
44 432 at UNICEF Uganda, but the information in this article represents S.M.'s personal views and  
45  
46 433 opinions and does not necessarily represent UNICEF Uganda's position.  
47  
48

49 434 **Competing interests:** None declared.  
50  
51

52 435 **Patient and public involvement:** Patients or the public were involved in the design, or  
53  
54 436 conduct, or reporting, or dissemination plans of this research. Refer to the Methods section for  
55  
56 437 further details.  
57  
58

59 438 **Patient consent:** Not required.  
60

1  
2  
3 439 **Ethics approval:** The study was approved by the Research Ethics Committee of the Graduate  
4  
5 440 School of Medicine, University of Tokyo (2019085NI), Institutional Research and Ethics  
6  
7 441 Committee of Mbarara University of Science and Technology (IRB15/06-19), and Uganda  
8  
9 442 National Council of Science and Technology (HS439ES).

10  
11  
12  
13 443 **Provenance and peer review:** Not commissioned; externally peer reviewed.

14  
15 444 **Data sharing statement:** The data underlying this study have been uploaded to the Figshare  
16  
17 445 Repository and are accessible at <https://doi.org/10.6084/m9.figshare.12936857.v1>

18  
19  
20  
21 446

22  
23 447 **Figure Legend:**

24  
25  
26 448 Figure 1. Flow of participants through the study  
27  
28  
29  
30  
31  
32  
33  
34  
35  
36  
37  
38  
39  
40  
41  
42  
43  
44  
45  
46  
47  
48  
49  
50  
51  
52  
53  
54  
55  
56  
57  
58  
59  
60



449

450

## References

- 451 1 Ameyaw EK, Budu E, Sambah F, et al. Prevalence and determinants of unintended  
452 pregnancy in sub-Saharan Africa: A multi-country analysis of demographic and health  
453 surveys. *PLoS One* 2019; **14**: e0220970.
- 454 2 UNAIDS. UNAIDS data 2019. 2019.  
455 [https://www.unaids.org/sites/default/files/media\\_asset/2019-UNAIDS-data\\_en.pdf](https://www.unaids.org/sites/default/files/media_asset/2019-UNAIDS-data_en.pdf) (accessed  
456 March 21, 2020).
- 457 3 Kharsany AB, Karim QA. HIV infection and AIDS in sub-Saharan Africa: Current  
458 status, challenges and opportunities. *Open AIDS J* 2016; **10**: 34–48.
- 459 4 Sia D, Onadja Y, Hajizadeh M, et al. What explains gender inequalities in HIV/AIDS  
460 prevalence in sub-Saharan Africa? Evidence from the demographic and health surveys. *BMC*  
461 *Public Health* 2016; **16**: 1136.
- 462 5 Lopez LM, Stockton LL, Chen M, et al. Behavioral interventions for improving dual-  
463 method contraceptive use. *Cochrane Database Syst Rev* 2014; **3**: Cd010915.
- 464 6 Mutowo J, Kasu CM. Barriers to use of dual protection among married women in a  
465 Suburban setting. *Nurs Health Sci* 2015; **4**: 51–7.
- 466 7 Osuafor GN, Maputle S, Ayiga N, et al. Condom use among married and cohabiting  
467 women and its implications for HIV infection in Mahikeng, South Africa. *J Pop Research*  
468 2018; **35**: 41–65.
- 469 8 Tsuyuki K, Gipson JD, Urada LA, et al. Dual protection to address the global  
470 syndemic of HIV and unintended pregnancy in Brazil. *J Fam Plann Reprod Health Care*  
471 2016; **42**: 271–9.

- 1  
2  
3 472 9 Kosugi H, Shibanuma A, Kiriya J, et al. Consistent condom use among highly  
4  
5 473 effective contraceptive users in an HIV-endemic area in rural Kenya. *PLoS One* 2019; **14**:  
6  
7 474 e0216208.
- 8  
9  
10 475 10 Woodsong C, Koo HP. Two good reasons: Women's and men's perspectives on dual  
11  
12 476 contraceptive use. *Soc Sci Med* 1999; **49**: 567–80.
- 13  
14  
15 477 11 Anglewicz P, Clark S. The effect of marriage and HIV risks on condom use  
16  
17 478 acceptability in rural Malawi. *Soc Sci Med* 2013; **97**: 29–40.
- 18  
19 479 12 Peipert JF, Zhao Q, Meints L, et al. Adherence to dual-method contraceptive use.  
20  
21 480 *Contraception* 2011; **84**: 252–8.
- 22  
23  
24 481 13 Sieving RE, McRee AL, McMorris BJ, et al. Prime time: Sexual health outcomes at  
25  
26 482 24 months for a clinic-linked intervention to prevent pregnancy risk behaviors. *JAMA Pediatr*  
27  
28 483 2013; **167**: 333–40.
- 29  
30  
31 484 14 Galárraga O, Harries J, Maughan-Brown B, et al. The Empower Nudge lottery to  
32  
33 485 increase dual protection use: A proof-of-concept randomised pilot trial in South Africa.  
34  
35 486 *Reprod Health Matters* 2018; **26**: 67–80.
- 36  
37  
38 487 15 Ministry of Health, Uganda. Uganda Population-based HIV Impact Assessment  
39  
40 488 (UPHIA) 2016-2017: Final Report. Kampala: Ministry of Health, 2019.
- 41  
42 489 16 Bakibinga P, Matanda DJ, Ayiko R, et al. Pregnancy history and current use of  
43  
44 490 contraception among women of reproductive age in Burundi, Kenya, Rwanda, Tanzania and  
45  
46 491 Uganda: Analysis of demographic and health survey data. *BMJ Open* 2016; **6**: e009991.
- 47  
48  
49 492 17 Uganda Bureau of Statistics. Uganda Demographic and Health Survey 2016. 2018.  
50  
51 493 <https://dhsprogram.com/pubs/pdf/FR333/FR333.pdf> (accessed August 10, 2020).
- 52  
53  
54 494 18 Marsh DR, Schroeder DG, Dearden KA, et al. The power of positive deviance. *BMJ*  
55  
56 495 2004; **329**: 1177–9.
- 57  
58  
59  
60

- 1  
2  
3 496 19 Herington MJ, van de Fliert E. Positive deviance in theory and practice: A conceptual  
4  
5 497 review. *Deviant Behav* 2018; **39**: 664–78.  
6  
7  
8 498 20 Kosugi H, Shibnuma A, Kiriya J, et al. Positive deviance for dual-method promotion  
9  
10 499 among women in Uganda: A qualitative study. *Int. J. Environ. Res. Public Health* 2020; **17**:  
11  
12 500 5009.  
13  
14 501 21 Kosugi H, Shibnuma A, Kiriya J, et al. Positive deviance for dual-method promotion  
15  
16 502 among women in Uganda: Study protocol for a cluster randomized controlled trial. *Trials*  
17  
18 503 2020; **21**: 270.  
19  
20  
21 504 22 Uganda Bureau of Statistics. The national population and housing census 2014–Main  
22  
23 505 report. 2016. [https://unstats.un.org/unsd/demographic/sources/census/wphc/Uganda/UGA-](https://unstats.un.org/unsd/demographic/sources/census/wphc/Uganda/UGA-2016-05-23.pdf)  
24  
25 506 [2016-05-23.pdf](https://unstats.un.org/unsd/demographic/sources/census/wphc/Uganda/UGA-2016-05-23.pdf). (accessed August 31, 2020).  
26  
27  
28 507 23 Ministry of Health, Uganda. National health facility master list 2018. Kampala:  
29  
30 508 Ministry of Health, 2089.  
31  
32  
33 509 24 Zhang J, Pals SL, Medley A, et al. Parameters for sample size estimation from a  
34  
35 510 group-randomized HIV prevention trial in HIV clinics in sub-Saharan Africa. *AIDS and*  
36  
37 511 *Behavior* 2014; **18**: 2359–65.  
38  
39  
40 512 25 WHO, Johns Hopkins Bloomberg School of Public Health. Center for  
41  
42 513 Communication Programs. Information and Knowledge for Optimal Health (INFO).  
43  
44 514 Decision-making tool for family planning clients and providers. 2005.  
45  
46 515 [https://www.who.int/reproductivehealth/publications/family\\_planning/9241593229/en/](https://www.who.int/reproductivehealth/publications/family_planning/9241593229/en/)  
47  
48 516 (accessed August 10, 2019).  
49  
50  
51 517 26 Reynolds HW, Luseno WK, Speizer IS. The measurement of condom use in four  
52  
53 518 countries in East and Southern Africa. *AIDS Behav* 2012; **16**: 1044–53.  
54  
55  
56 519 27 Carey MP, Schroder KEE. Development and psychometric evaluation of the brief  
57  
58 520 HIV Knowledge Questionnaire. *AIDS Educ Prev* 2002; **14**: 172–82.  
59  
60

- 1  
2  
3 521 28 Shaweno D, Tekletsadik E. Validation of the condom use self-efficacy scale in  
4  
5 522 Ethiopia. *BMC Int Health Hum Rights* 2013; **13**: 22.  
6  
7  
8 523 29 Pulerwitz J, Gortmaker SL, DeJong W. Measuring sexual relationship power in  
9  
10 524 HIV/STD research. *Sex Roles* 2000; **42**: 637–60.  
11  
12 525 30 Chimbiri AM. The condom is an ‘intruder’ in marriage: Evidence from rural Malawi.  
13  
14 526 *Soc Sci Med* 2007; **64**: 1102–15.  
15  
16  
17 527 31 Babalola S, Awasum D, Quenum-Renaud B. The correlates of safe sex practices  
18  
19 528 among Rwandan youth: A positive deviance approach. *Afr J AIDS Res* 2002; **1**: 11-21.  
20  
21 529 32 Williamson NE, Liku J, McLoughlin K, et al. A qualitative study of condom use  
22  
23 530 among married couples in Kampala, Uganda. *Reprod Health Matters* 2006; **14**: 89–98.  
24  
25  
26 531 33 Berenson AB, Rahman M. A randomized controlled study of two educational  
27  
28 532 interventions on adherence with oral contraceptives and condoms. *Contraception* 2012; **86**:  
29  
30 533 716-24.  
31  
32  
33 534 34 Lawani LO, Onyebuchi AK, Iyoke CA. Dual method use for protection of pregnancy  
34  
35 535 and disease prevention among HIV-infected women in South East Nigeria. *BMC Womens*  
36  
37 536 *Health* 2014;**14**: 39.  
38  
39  
40 537 35 Pascale R, Monique S, Sternin J. The power of positive deviance: How unlikely  
41  
42 538 innovators solve the world’s toughest problems. 1st ed. Brighton, Massachusetts: Harvard  
43  
44 539 Business Press; 2010.  
45  
46  
47 540  
48  
49  
50  
51  
52  
53  
54  
55  
56  
57  
58  
59  
60

541 **Table 1. Overview of intervention**

| Training setting                                         | Duration        | Topics covered                                                                                                                                                                                                                                                                                                                                                                                                                                                                                                                                                                                                                                                                                                                                                                                                                                                                                            |
|----------------------------------------------------------|-----------------|-----------------------------------------------------------------------------------------------------------------------------------------------------------------------------------------------------------------------------------------------------------------------------------------------------------------------------------------------------------------------------------------------------------------------------------------------------------------------------------------------------------------------------------------------------------------------------------------------------------------------------------------------------------------------------------------------------------------------------------------------------------------------------------------------------------------------------------------------------------------------------------------------------------|
| Clinic-based counseling                                  | 20–30 mins      | <ol style="list-style-type: none"> <li>1. Comparing family planning methods*</li> <li>2. HIV/STI risk*</li> <li>3. Ways to avoid HIV/STIs*</li> <li>4. Introduction and demonstration of male condoms</li> <li>5. Effective communication with partners</li> <li>6. Information about the workshop</li> </ol>                                                                                                                                                                                                                                                                                                                                                                                                                                                                                                                                                                                             |
| One-day workshop at a health facility facilitated by PDs | 5 hours         | <ol style="list-style-type: none"> <li>1. Introduction of family planning methods</li> <li>2. Way to avoid unintended pregnancies</li> <li>3. Introduction of HIV/STI risk</li> <li>4. Way to avoid HIV/STIs</li> <li>5. Group discussion 1: Let's consider your HIV/STI risk</li> <li>6. Practice of condom use</li> <li>7. Experience of four PDs</li> <li>8. Role-play exercises: Effective communication with partners               <ul style="list-style-type: none"> <li>- How to initiate discussions about condom use</li> <li>- How to persuade partners</li> <li>- How to avoid conflicts</li> </ul> </li> <li>9. Group Dissuasion 2: Recapitulate takeaway messages               <ul style="list-style-type: none"> <li>- Why is dual-method contraception important?</li> <li>- What are barriers to using dual-method contraception, and how can you overcome them?</li> </ul> </li> </ol> |
| Bimonthly phone-based counseling                         | 15–30 mins each | <ol style="list-style-type: none"> <li>1. Brief health message*:               <ul style="list-style-type: none"> <li>- Family planning methods (at 3 months)*</li> <li>- Ways to avoid HIV/STIs (at 5 months)*</li> <li>- General facts about HIV/STIs (at 7 months)*</li> </ul> </li> <li>2. Counseling tailored to individual participants' situation and needs</li> </ol>                                                                                                                                                                                                                                                                                                                                                                                                                                                                                                                             |

PD: positive deviant

\* Women in the control group received only these interventions using the existing tool.

542

543

544 **Table 2. Characteristics of women at baseline by intervention group (n = 960)**

| Variables                                         | Intervention<br>(n = 480) |       | Control<br>(n = 480) |       | Total<br>(n = 960) |       | p-value <sup>†</sup> |
|---------------------------------------------------|---------------------------|-------|----------------------|-------|--------------------|-------|----------------------|
|                                                   | n                         | %     | n                    | %     | n                  | %     |                      |
| <b>1) Sociodemographic characteristics</b>        |                           |       |                      |       |                    |       |                      |
| Age in years, mean (SD)                           | 30.4                      | (6.5) | 29.8                 | (6.8) | 30.1               | (6.7) | 0.126                |
| <b>Education</b>                                  |                           |       |                      |       |                    |       |                      |
| Never                                             | 145                       | 30.2  | 117                  | 24.4  | 262                | 27.3  | <b>0.042</b>         |
| Primary and more                                  | 335                       | 69.8  | 363                  | 75.6  | 698                | 72.7  |                      |
| <b>Religion</b>                                   |                           |       |                      |       |                    |       |                      |
| Christian                                         | 450                       | 93.8  | 436                  | 90.8  | 886                | 92.3  | 0.090                |
| Muslim                                            | 30                        | 6.3   | 44                   | 9.2   | 74                 | 7.7   |                      |
| <b>Wealth index</b>                               |                           |       |                      |       |                    |       |                      |
| Poor                                              | 176                       | 36.7  | 158                  | 32.9  | 334                | 34.8  | <b>0.008</b>         |
| Middle                                            | 168                       | 35.0  | 141                  | 29.4  | 309                | 32.2  |                      |
| Rich                                              | 136                       | 28.3  | 181                  | 37.7  | 317                | 33.0  |                      |
| No. of children, mean (SD)                        | 3.2                       | (1.7) | 2.9                  | (1.8) | 3.0                | (1.8) | <b>0.041</b>         |
| <b>Pregnancy intention</b>                        |                           |       |                      |       |                    |       |                      |
| No                                                | 100                       | 20.8  | 96                   | 20.0  | 196                | 20.4  | 0.822                |
| Yes                                               | 342                       | 71.3  | 341                  | 71.0  | 683                | 71.2  |                      |
| Don't know                                        | 38                        | 7.9   | 43                   | 9.0   | 81                 | 8.4   |                      |
| <b>Partner's pregnancy intention</b>              |                           |       |                      |       |                    |       |                      |
| No                                                | 69                        | 14.4  | 68                   | 14.2  | 137                | 14.3  | 0.776                |
| Yes                                               | 322                       | 67.1  | 331                  | 69.0  | 653                | 68.0  |                      |
| Don't know                                        | 89                        | 18.5  | 81                   | 16.9  | 170                | 17.7  |                      |
| <b>History of unintended pregnancy</b>            |                           |       |                      |       |                    |       |                      |
| No                                                | 313                       | 65.2  | 335                  | 69.8  | 648                | 67.5  | 0.130                |
| Yes                                               | 167                       | 34.8  | 145                  | 30.2  | 312                | 32.5  |                      |
| <b>Multiple sex partners</b>                      |                           |       |                      |       |                    |       |                      |
| No                                                | 452                       | 94.2  | 456                  | 95.0  | 908                | 94.6  | 0.568                |
| Yes                                               | 28                        | 5.8   | 24                   | 5.0   | 52                 | 5.4   |                      |
| <b>2) HIV-related characteristics</b>             |                           |       |                      |       |                    |       |                      |
| <b>HIV status</b>                                 |                           |       |                      |       |                    |       |                      |
| Negative                                          | 438                       | 91.3  | 436                  | 90.8  | 874                | 91.0  | 0.821                |
| Positive                                          | 42                        | 8.8   | 44                   | 9.2   | 86                 | 9.0   |                      |
| <b>Partner's HIV status</b>                       |                           |       |                      |       |                    |       |                      |
| Negative                                          | 386                       | 80.4  | 373                  | 77.7  | 759                | 79.1  | 0.587                |
| Positive                                          | 34                        | 7.1   | 39                   | 8.1   | 73                 | 7.6   |                      |
| Don't know                                        | 60                        | 12.5  | 68                   | 14.2  | 128                | 13.3  |                      |
| <b>Disclosure of HIV status</b>                   |                           |       |                      |       |                    |       |                      |
| No                                                | 21                        | 4.4   | 19                   | 4.0   | 40                 | 4.2   | 0.747                |
| Yes                                               | 459                       | 95.6  | 461                  | 96.0  | 920                | 95.8  |                      |
| <b>HIV/STI risk perception</b>                    |                           |       |                      |       |                    |       |                      |
| No risk at all                                    | 62                        | 12.9  | 87                   | 18.1  | 149                | 15.5  | 0.124                |
| Small                                             | 177                       | 36.9  | 178                  | 37.1  | 355                | 37.0  |                      |
| Moderate                                          | 136                       | 28.3  | 124                  | 25.8  | 260                | 27.1  |                      |
| Great                                             | 105                       | 21.9  | 91                   | 19.0  | 196                | 20.4  |                      |
| <b>3) Non-barrier modern contraceptive use</b>    |                           |       |                      |       |                    |       |                      |
| <b>Methods in use</b>                             |                           |       |                      |       |                    |       |                      |
| Injectables                                       | 252                       | 52.5  | 246                  | 51.3  | 498                | 51.9  | 0.599                |
| Implants                                          | 155                       | 32.3  | 148                  | 30.8  | 303                | 31.6  |                      |
| IUDs                                              | 43                        | 9.0   | 54                   | 11.3  | 97                 | 10.1  |                      |
| OCPs                                              | 27                        | 5.6   | 31                   | 6.5   | 58                 | 6.0   |                      |
| Female sterilization                              | 3                         | 0.6   | 1                    | 0.2   | 4                  | 0.4   |                      |
| <b>Partner's recognition of contraceptive use</b> |                           |       |                      |       |                    |       |                      |
| No                                                | 36                        | 7.5   | 43                   | 9.0   | 79                 | 8.2   | 0.411                |
| Yes                                               | 444                       | 92.5  | 437                  | 91.0  | 881                | 91.8  |                      |
| <b>Partner's attitude about contraceptive use</b> |                           |       |                      |       |                    |       |                      |
| Positive                                          | 432                       | 90.0  | 439                  | 91.7  | 871                | 90.8  | 0.229                |
| Negative                                          | 36                        | 7.5   | 35                   | 7.3   | 71                 | 7.4   |                      |
| Don't know                                        | 12                        | 2.5   | 5                    | 1.0   | 17                 | 1.8   |                      |
| <b>4) Other psychosocial characteristics</b>      |                           |       |                      |       |                    |       |                      |
| HIV-related knowledge (HIV-KQ-18), mean (SD)      | 11.9                      | (2.6) | 11.3                 | (3.0) | 11.6               | (2.8) | <b>&lt;0.001</b>     |
| Condom use self-efficacy scale, mean (SD)         | 22.3                      | (9.3) | 22.1                 | (8.3) | 22.2               | (8.8) | 0.682                |
| <b>Sexual Relationship Power Scale</b>            |                           |       |                      |       |                    |       |                      |
| Low                                               | 173                       | 36.0  | 152                  | 31.7  | 325                | 33.9  | 0.352                |
| Medium                                            | 168                       | 35.0  | 182                  | 37.9  | 350                | 36.5  |                      |
| High                                              | 139                       | 29.0  | 146                  | 30.4  | 285                | 29.7  |                      |

SD: standard deviation; IUD: intrauterine device; OCP: oral contraceptive pill

<sup>†</sup>Based on chi-squared test for other categorical variables and t-test for continuous variables545  
546

547 **Table 3. Dual-method contraceptive use by intervention group and time<sup>a</sup>**

| Outcomes                                                        | Intervention |      | Control |      | Total |      | p-value <sup>†</sup> |
|-----------------------------------------------------------------|--------------|------|---------|------|-------|------|----------------------|
|                                                                 | n            | %    | n       | %    | n     | %    |                      |
| <b>Dual-method contraceptive use at last sexual intercourse</b> |              |      |         |      |       |      |                      |
| Baseline                                                        | 41           | 8.5  | 28      | 5.8  | 69    | 7.2  | 0.104                |
| Month 2                                                         | 157          | 42.6 | 46      | 13.8 | 203   | 28.9 | <0.001               |
| Month 4                                                         | 110          | 27.9 | 55      | 15.4 | 165   | 21.9 | <0.001               |
| Month 6                                                         | 91           | 23.3 | 40      | 10.7 | 131   | 17.2 | <0.001               |
| Month 8                                                         | 82           | 20.9 | 33      | 8.7  | 115   | 14.9 | <0.001               |
| <b>Consistent dual-method contraceptive use</b>                 |              |      |         |      |       |      |                      |
| Baseline                                                        | -            | -    | -       | -    | -     | -    | -                    |
| Month 2                                                         | 57           | 15.5 | 5       | 1.5  | 62    | 8.8  | <0.001               |
| Month 4                                                         | 42           | 10.7 | 8       | 2.2  | 50    | 6.7  | <0.001               |
| Month 6                                                         | 32           | 8.2  | 5       | 1.3  | 37    | 4.9  | <0.001               |
| Month 8                                                         | 44           | 11.2 | 5       | 1.3  | 49    | 6.4  | <0.001               |

<sup>a</sup> Refer to Figure 1 for “n” at baseline and follow-up for each group

<sup>†</sup> Based on chi-squared test

**Table 4. Effects of intervention on primary outcome among women at 2, 4, 6, and 8 months after enrollment**

| Variables                                                       | Month 2                  |                              | Month 4                 |                              | Month 6                 |                              | Month 8                 |                              |
|-----------------------------------------------------------------|--------------------------|------------------------------|-------------------------|------------------------------|-------------------------|------------------------------|-------------------------|------------------------------|
|                                                                 | Model 1                  | Model 2                      | Model 1                 | Model 2                      | Model 1                 | Model 2                      | Model 1                 | Model 2                      |
|                                                                 | OR<br>(95% CI)           | AOR <sup>a</sup><br>(95% CI) | OR<br>(95% CI)          | AOR <sup>a</sup><br>(95% CI) | OR<br>(95% CI)          | AOR <sup>a</sup><br>(95% CI) | OR<br>(95% CI)          | AOR <sup>a</sup><br>(95% CI) |
| <b>Dual-method contraceptive use at last sexual intercourse</b> | 4.62***<br>(3.18- 6.71)  | 4.12***<br>(2.02-8.39)       | 2.13***<br>(1.49-3.06)  | 1.66<br>(0.84-3.30)          | 2.53***<br>(1.69-3.79)  | 2.03<br>(0.99-4.14)          | 2.76***<br>(1.79-4.26)  | 2.16*<br>(1.06-4.41)         |
| <b>Consistent dual-method contraceptive use</b>                 | 11.98***<br>(4.74-30.29) | 14.53***<br>(3.63-58.13)     | 5.22***<br>(2.42-11.28) | 6.30**<br>(2.20-18.03)       | 6.58***<br>(2.53-17.07) | 8.04*<br>(1.17-55.08)        | 9.43***<br>(3.70-24.06) | 10.72**<br>(2.03-56.64)      |

Note: Table reports effects estimates using odds ratio (OR) and adjusted odds ratio (AOR) from multiple logistic regression using the control group as the reference category.

\*\*\*p < 0.001, \*\*p < 0.01, \*p < 0.05

a. Adjusted for cluster effect, individuals, age, education, religion, wealth index, number of children, pregnancy intention, partner's pregnancy intention, history of unintended pregnancy, multiple sex partnership, non-barrier modern contraceptive methods, HIV status, partner's HIV status, HIV/STI risk perception, HIV-related knowledge, condom use self-efficacy, and sexual relationship control power.



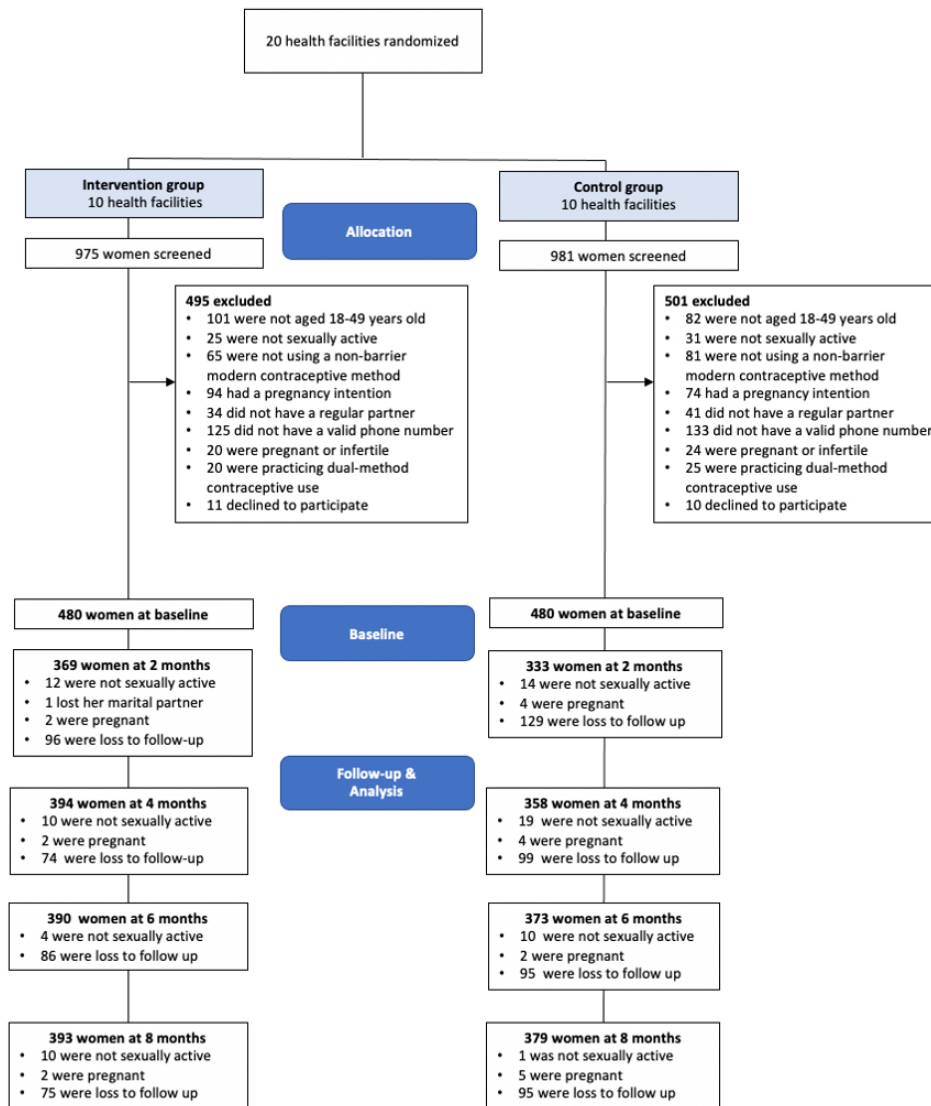

Figure 1. Flow of participants through the study

# S1 Table CONSORT checklist

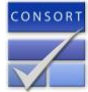

## CONSORT 2010 checklist of information to include when reporting a randomised trial\*

| Section/Topic                    | Item No | Checklist item                                                                                                                                                                              | Reported on page No |
|----------------------------------|---------|---------------------------------------------------------------------------------------------------------------------------------------------------------------------------------------------|---------------------|
| <b>Title and abstract</b>        |         |                                                                                                                                                                                             |                     |
|                                  | 1a      | Identification as a randomised trial in the title                                                                                                                                           | p 1                 |
|                                  | 1b      | Structured summary of trial design, methods, results, and conclusions (for specific guidance see CONSORT for abstracts)                                                                     | p 2 and 3           |
| <b>Introduction</b>              |         |                                                                                                                                                                                             |                     |
| Background and objectives        | 2a      | Scientific background and explanation of rationale                                                                                                                                          | p 4-6               |
|                                  | 2b      | Specific objectives or hypotheses                                                                                                                                                           | p 6                 |
| <b>Methods</b>                   |         |                                                                                                                                                                                             |                     |
| Trial design                     | 3a      | Description of trial design (such as parallel, factorial) including allocation ratio                                                                                                        | p 7                 |
|                                  | 3b      | Important changes to methods after trial commencement (such as eligibility criteria), with reasons                                                                                          | NA                  |
| Participants                     | 4a      | Eligibility criteria for participants                                                                                                                                                       | p 7 and 8           |
|                                  | 4b      | Settings and locations where the data were collected                                                                                                                                        | p 7                 |
| Interventions                    | 5       | The interventions for each group with sufficient details to allow replication, including how and when they were actually administered                                                       | p 9-11              |
| Outcomes                         | 6a      | Completely defined pre-specified primary and secondary outcome measures, including how and when they were assessed                                                                          | p 11 and 12         |
|                                  | 6b      | Any changes to trial outcomes after the trial commenced, with reasons                                                                                                                       | NA                  |
| Sample size                      | 7a      | How sample size was determined                                                                                                                                                              | p 8                 |
|                                  | 7b      | When applicable, explanation of any interim analyses and stopping guidelines                                                                                                                | NA                  |
| <b>Randomisation:</b>            |         |                                                                                                                                                                                             |                     |
| Sequence generation              | 8a      | Method used to generate the random allocation sequence                                                                                                                                      | p 8                 |
|                                  | 8b      | Type of randomisation; details of any restriction (such as blocking and block size)                                                                                                         | p 8                 |
| Allocation concealment mechanism | 9       | Mechanism used to implement the random allocation sequence (such as sequentially numbered containers), describing any steps taken to conceal the sequence until interventions were assigned | p 8                 |

|    |                                                      |     |                                                                                                                                                   |                       |
|----|------------------------------------------------------|-----|---------------------------------------------------------------------------------------------------------------------------------------------------|-----------------------|
| 1  | Implementation                                       | 10  | Who generated the random allocation sequence, who enrolled participants, and who assigned participants to interventions                           | p 8                   |
| 2  |                                                      |     |                                                                                                                                                   |                       |
| 3  | Blinding                                             | 11a | If done, who was blinded after assignment to interventions (for example, participants, care providers, those assessing outcomes) and how          | p 8                   |
| 4  |                                                      |     |                                                                                                                                                   |                       |
| 5  |                                                      | 11b | If relevant, description of the similarity of interventions                                                                                       | NA                    |
| 6  |                                                      |     |                                                                                                                                                   |                       |
| 7  | Statistical methods                                  | 12a | Statistical methods used to compare groups for primary and secondary outcomes                                                                     | p 13                  |
| 8  |                                                      | 12b | Methods for additional analyses, such as subgroup analyses and adjusted analyses                                                                  | p 13                  |
| 9  |                                                      |     |                                                                                                                                                   |                       |
| 10 | <b>Results</b>                                       |     |                                                                                                                                                   |                       |
| 11 | Participant flow (a diagram is strongly recommended) | 13a | For each group, the numbers of participants who were randomly assigned, received intended treatment, and were analysed for the primary outcome    | p 14                  |
| 12 |                                                      |     |                                                                                                                                                   |                       |
| 13 |                                                      | 13b | For each group, losses and exclusions after randomisation, together with reasons                                                                  | p 14 and Figure 1     |
| 14 |                                                      |     |                                                                                                                                                   |                       |
| 15 |                                                      |     |                                                                                                                                                   |                       |
| 16 | Recruitment                                          | 14a | Dates defining the periods of recruitment and follow-up                                                                                           | p 7 and 12            |
| 17 |                                                      | 14b | Why the trial ended or was stopped                                                                                                                | p 7 and 12            |
| 18 | Baseline data                                        | 15  | A table showing baseline demographic and clinical characteristics for each group                                                                  | Table 2               |
| 19 | Numbers analysed                                     | 16  | For each group, number of participants (denominator) included in each analysis and whether the analysis was by original assigned groups           | p 14                  |
| 20 |                                                      |     |                                                                                                                                                   |                       |
| 21 |                                                      |     |                                                                                                                                                   |                       |
| 22 | Outcomes and estimation                              | 17a | For each primary and secondary outcome, results for each group, and the estimated effect size and its precision (such as 95% confidence interval) | p 15-16               |
| 23 |                                                      |     |                                                                                                                                                   |                       |
| 24 |                                                      | 17b | For binary outcomes, presentation of both absolute and relative effect sizes is recommended                                                       | p 15-16               |
| 25 | Ancillary analyses                                   | 18  | Results of any other analyses performed, including subgroup analyses and adjusted analyses, distinguishing pre-specified from exploratory         | p 14 and S2-10 Tables |
| 26 |                                                      |     |                                                                                                                                                   |                       |
| 27 |                                                      |     |                                                                                                                                                   |                       |
| 28 | Harms                                                | 19  | All important harms or unintended effects in each group (for specific guidance see CONSORT for harms)                                             | NA                    |
| 29 |                                                      |     |                                                                                                                                                   |                       |
| 30 | <b>Discussion</b>                                    |     |                                                                                                                                                   |                       |
| 31 | Limitations                                          | 20  | Trial limitations, addressing sources of potential bias, imprecision, and, if relevant, multiplicity of analyses                                  | p 19                  |
| 32 | Generalisability                                     | 21  | Generalisability (external validity, applicability) of the trial findings                                                                         | p 19                  |
| 33 | Interpretation                                       | 22  | Interpretation consistent with results, balancing benefits and harms, and considering other relevant evidence                                     | p 16-20               |
| 34 |                                                      |     |                                                                                                                                                   |                       |
| 35 | <b>Other information</b>                             |     |                                                                                                                                                   |                       |
| 36 | Registration                                         | 23  | Registration number and name of trial registry                                                                                                    | p 3 and 13            |
| 37 | Protocol                                             | 24  | Where the full trial protocol can be accessed, if available                                                                                       | p 7                   |
| 38 | Funding                                              | 25  | Sources of funding and other support (such as supply of drugs), role of funders                                                                   | p 20                  |
| 39 |                                                      |     |                                                                                                                                                   |                       |
| 40 |                                                      |     |                                                                                                                                                   |                       |
| 41 |                                                      |     |                                                                                                                                                   |                       |
| 42 |                                                      |     |                                                                                                                                                   |                       |

1 \*We strongly recommend reading this statement in conjunction with the CONSORT 2010 Explanation and Elaboration for important clarifications on all the items. If relevant, we also  
2 recommend reading CONSORT extensions for cluster randomised trials, non-inferiority and equivalence trials, non-pharmacological treatments, herbal interventions, and pragmatic trials.  
3 Additional extensions are forthcoming: for those and for up to date references relevant to this checklist, see [www.consort-statement.org](http://www.consort-statement.org).  
4  
5  
6  
7  
8  
9  
10  
11  
12  
13  
14  
15  
16  
17  
18  
19  
20  
21  
22  
23  
24  
25  
26  
27  
28  
29  
30  
31  
32  
33  
34  
35  
36  
37  
38  
39  
40  
41  
42

For peer review only

Table S2. Baseline characteristics of women lost to follow up in the intervention and control groups

| Variables                                   | Month 2      |                   |         |                   |          | Month 4      |                   |          |         |                   | Month 6      |         |                   |          |         | Month 8           |          |         |                   |          |      |       |      |       |       |      |       |      |       |       |      |       |      |       |       |      |       |      |       |       |
|---------------------------------------------|--------------|-------------------|---------|-------------------|----------|--------------|-------------------|----------|---------|-------------------|--------------|---------|-------------------|----------|---------|-------------------|----------|---------|-------------------|----------|------|-------|------|-------|-------|------|-------|------|-------|-------|------|-------|------|-------|-------|------|-------|------|-------|-------|
|                                             | Intervention |                   | Control |                   |          | Intervention |                   | Control  |         |                   | Intervention |         | Control           |          |         | Intervention      |          | Control |                   |          |      |       |      |       |       |      |       |      |       |       |      |       |      |       |       |      |       |      |       |       |
|                                             | Reached      | Lost to follow-up | Reached | Lost to follow-up | p-value† | Reached      | Lost to follow-up | p-value† | Reached | Lost to follow-up | p-value†     | Reached | Lost to follow-up | p-value† | Reached | Lost to follow-up | p-value† | Reached | Lost to follow-up | p-value† |      |       |      |       |       |      |       |      |       |       |      |       |      |       |       |      |       |      |       |       |
| <b>1) Socio-demographic characteristics</b> |              |                   |         |                   |          |              |                   |          |         |                   |              |         |                   |          |         |                   |          |         |                   |          |      |       |      |       |       |      |       |      |       |       |      |       |      |       |       |      |       |      |       |       |
| Age in years, mean (SD)                     | 30.6         | (6.5)             | 29.8    | (6.7)             | 0.291    | 30.5         | (7.0)             | 27.7     | (5.8)   | <0.001            | 30.4         | (6.4)   | 30.5              | (6.9)    | 0.965   | 30.2              | (6.9)    | 28.1    | (6.1)             | 0.006    | 30.6 | (6.4) | 29.5 | (6.8) | 0.166 | 30.1 | (6.9) | 28.3 | (6.2) | 0.016 | 30.6 | (6.4) | 29.5 | (7.2) | 0.158 | 30.1 | (6.9) | 28.5 | (6.1) | 0.044 |
| <b>Education</b>                            |              |                   |         |                   |          |              |                   |          |         |                   |              |         |                   |          |         |                   |          |         |                   |          |      |       |      |       |       |      |       |      |       |       |      |       |      |       |       |      |       |      |       |       |
| Never                                       | 114          | 29.8              | 31      | 32.0              | 0.674    | 78           | 22.2              | 39       | 30.2    | 0.070             | 122          | 30.1    | 23                | 31.1     | 0.859   | 88                | 23.1     | 29      | 29.3              | 0.201    | 118  | 30.0  | 27   | 31.4  | 0.791 | 88   | 22.9  | 29   | 30.5  | 0.119 | 119  | 29.4  | 26   | 34.7  | 0.360 | 87   | 22.6  | 30   | 31.6  | 0.068 |
| Primary and more                            | 269          | 70.2              | 66      | 68.0              |          | 273          | 77.8              | 90       | 69.8    |                   | 284          | 70.0    | 51                | 68.9     |         | 293               | 76.9     | 70      | 70.7              |          | 276  | 70.1  | 59   | 68.6  |       | 297  | 77.1  | 66   | 69.5  |       | 286  | 70.6  | 49   | 65.3  |       | 298  | 77.4  | 65   | 68.4  |       |
| <b>Religion</b>                             |              |                   |         |                   |          |              |                   |          |         |                   |              |         |                   |          |         |                   |          |         |                   |          |      |       |      |       |       |      |       |      |       |       |      |       |      |       |       |      |       |      |       |       |
| Christian                                   | 356          | 93.0              | 94      | 96.9              | 0.150    | 320          | 91.2              | 116      | 89.9    | 0.675             | 378          | 93.1    | 72                | 97.3     | 0.170   | 345               | 90.6     | 91      | 91.9              | 0.674    | 366  | 92.9  | 84   | 96.9  | 0.097 | 349  | 90.7  | 87   | 91.6  | 0.779 | 376  | 92.8  | 74   | 98.7  | 0.055 | 349  | 90.7  | 87   | 91.6  | 0.779 |
| Muslim                                      | 27           | 7.1               | 3       | 3.1               |          | 31           | 8.8               | 13       | 10.1    |                   | 28           | 6.9     | 2                 | 2.7      |         | 36                | 9.5      | 8       | 8.1               |          | 28   | 7.1   | 2    | 3.1   |       | 36   | 9.4   | 8    | 8.4   |       | 29   | 7.2   | 1    | 1.3   |       | 36   | 9.4   | 8    | 8.4   |       |
| <b>Wealth index</b>                         |              |                   |         |                   |          |              |                   |          |         |                   |              |         |                   |          |         |                   |          |         |                   |          |      |       |      |       |       |      |       |      |       |       |      |       |      |       |       |      |       |      |       |       |
| Poor                                        | 139          | 36.3              | 37      | 38.1              | 0.821    | 119          | 33.9              | 39       | 30.2    | 0.070             | 142          | 35.0    | 34                | 46.0     | 0.190   | 133               | 34.9     | 25      | 25.3              | 0.188    | 139  | 35.3  | 37   | 43.0  | 0.134 | 135  | 35.1  | 23   | 24.2  | 0.119 | 143  | 35.3  | 33   | 44.0  | 0.112 | 135  | 35.1  | 23   | 24.2  | 0.119 |
| Middle                                      | 133          | 34.7              | 35      | 36.1              |          | 93           | 26.5              | 48       | 37.2    |                   | 145          | 35.7    | 23                | 31.1     |         | 108               | 28.4     | 33      | 33.3              |          | 136  | 34.5  | 32   | 37.2  |       | 111  | 28.8  | 30   | 31.6  |       | 140  | 34.6  | 28   | 37.3  |       | 111  | 28.8  | 30   | 31.6  |       |
| Rich                                        | 111          | 29.0              | 25      | 25.8              |          | 139          | 39.6              | 42       | 32.6    |                   | 119          | 29.3    | 17                | 23.0     |         | 140               | 36.8     | 41      | 41.4              |          | 119  | 30.2  | 17   | 19.8  |       | 139  | 36.1  | 42   | 44.2  |       | 122  | 30.1  | 14   | 18.7  |       | 139  | 36.1  | 42   | 44.2  |       |
| <b>No. of children, mean (SD)</b>           |              |                   |         |                   |          |              |                   |          |         |                   |              |         |                   |          |         |                   |          |         |                   |          |      |       |      |       |       |      |       |      |       |       |      |       |      |       |       |      |       |      |       |       |
| No                                          | 3.2          | (1.7)             | 3.0     | (1.7)             | 0.428    | 3.0          | (1.9)             | 2.7      | (1.7)   | 0.099             | 3.2          | (1.7)   | 3.1               | (1.9)    | 0.859   | 3.0               | (1.9)    | 2.6     | (1.7)             | 0.044    | 3.2  | (1.7) | 3.0  | (1.8) | 0.394 | 3.0  | (1.8) | 2.8  | (1.9) | 0.343 | 3.2  | (1.7) | 3.0  | (1.9) | 0.438 | 2.9  | (1.9) | 2.8  | (1.8) | 0.607 |
| <b>Pregnancy intention</b>                  |              |                   |         |                   |          |              |                   |          |         |                   |              |         |                   |          |         |                   |          |         |                   |          |      |       |      |       |       |      |       |      |       |       |      |       |      |       |       |      |       |      |       |       |
| No                                          | 81           | 21.2              | 19      | 19.6              | 0.891    | 76           | 21.7              | 20       | 15.5    | 0.195             | 83           | 20.4    | 17                | 23.0     | 0.391   | 78                | 20.5     | 18      | 18.2              | 0.126    | 84   | 21.3  | 16   | 18.6  | 0.349 | 77   | 20.0  | 19   | 20.0  | 0.190 | 88   | 21.7  | 12   | 16.0  | 0.442 | 75   | 19.5  | 21   | 22.1  | 0.462 |
| Yes                                         | 271          | 70.8              | 71      | 73.2              |          | 247          | 70.4              | 94       | 72.9    |                   | 288          | 70.9    | 54                | 73.0     |         | 274               | 71.9     | 67      | 67.7              |          | 276  | 70.1  | 66   | 76.7  |       | 278  | 72.2  | 63   | 66.3  |       | 284  | 70.1  | 58   | 77.3  |       | 278  | 72.2  | 63   | 66.3  |       |
| Don't know                                  | 31           | 8.1               | 7       | 7.2               |          | 28           | 8.0               | 15       | 11.6    |                   | 35           | 8.6     | 3                 | 4.1      |         | 29                | 7.6      | 14      | 14.1              |          | 34   | 8.6   | 4    | 4.7   |       | 30   | 7.8   | 13   | 13.7  |       | 33   | 8.2   | 5    | 6.7   |       | 32   | 8.3   | 11   | 11.6  |       |
| <b>Partner's pregnancy intention</b>        |              |                   |         |                   |          |              |                   |          |         |                   |              |         |                   |          |         |                   |          |         |                   |          |      |       |      |       |       |      |       |      |       |       |      |       |      |       |       |      |       |      |       |       |
| No                                          | 57           | 14.9              | 12      | 12.4              | 0.462    | 53           | 15.1              | 15       | 11.6    | 0.293             | 55           | 13.6    | 14                | 18.9     | 0.454   | 57                | 15.0     | 11      | 11.1              | 0.541    | 58   | 14.7  | 11   | 12.8  | 0.896 | 55   | 14.3  | 13   | 13.7  | 0.833 | 61   | 15.1  | 8    | 10.7  | 0.600 | 54   | 14.0  | 14   | 14.7  | 0.799 |
| Yes                                         | 259          | 67.6              | 63      | 65.0              |          | 235          | 67.0              | 96       | 74.4    |                   | 276          | 68.0    | 46                | 62.2     |         | 262               | 68.8     | 69      | 69.7              |          | 263  | 68.8  | 59   | 68.6  |       | 267  | 69.4  | 64   | 67.4  |       | 269  | 66.4  | 53   | 70.7  |       | 268  | 69.6  | 63   | 66.3  |       |
| Don't know                                  | 67           | 17.5              | 22      | 22.7              |          | 63           | 18.0              | 18       | 14.0    |                   | 75           | 18.5    | 14                | 18.9     |         | 62                | 16.3     | 19      | 19.2              |          | 73   | 18.5  | 16   | 18.6  |       | 63   | 16.4  | 18   | 19.0  |       | 75   | 18.5  | 14   | 18.7  |       | 63   | 16.4  | 18   | 19.0  |       |
| <b>History of unintended pregnancy</b>      |              |                   |         |                   |          |              |                   |          |         |                   |              |         |                   |          |         |                   |          |         |                   |          |      |       |      |       |       |      |       |      |       |       |      |       |      |       |       |      |       |      |       |       |
| No                                          | 245          | 64.0              | 68      | 70.1              | 0.257    | 248          | 70.7              | 87       | 67.4    | 0.497             | 266          | 65.5    | 47                | 63.5     | 0.739   | 265               | 69.6     | 70      | 70.7              | 0.824    | 258  | 65.5  | 55   | 64.0  | 0.787 | 265  | 68.8  | 70   | 73.7  | 0.356 | 261  | 64.4  | 52   | 69.3  | 0.414 | 266  | 69.1  | 69   | 72.6  | 0.501 |
| Yes                                         | 138          | 36.0              | 29      | 29.9              |          | 103          | 29.3              | 42       | 32.6    |                   | 140          | 34.5    | 27                | 36.5     |         | 116               | 30.5     | 29      | 29.3              |          | 136  | 34.5  | 31   | 36.0  |       | 120  | 31.2  | 25   | 26.3  |       | 144  | 35.6  | 23   | 30.7  |       | 119  | 30.9  | 26   | 27.4  |       |
| <b>Multiple sex partners</b>                |              |                   |         |                   |          |              |                   |          |         |                   |              |         |                   |          |         |                   |          |         |                   |          |      |       |      |       |       |      |       |      |       |       |      |       |      |       |       |      |       |      |       |       |
| No                                          | 360          | 94.0              | 92      | 94.9              | 0.750    | 333          | 94.9              | 123      | 95.4    | 0.832             | 382          | 94.1    | 70                | 89.2     | 0.864   | 361               | 94.8     | 95      | 96.0              | 0.623    | 371  | 94.2  | 81   | 94.2  | 0.993 | 365  | 94.8  | 91   | 95.8  | 0.693 | 380  | 93.8  | 72   | 96.0  | 0.461 | 365  | 94.8  | 91   | 95.8  | 0.693 |
| Yes                                         | 23           | 6.0               | 5       | 5.2               |          | 18           | 5.1               | 6        | 4.7     |                   | 24           | 5.9     | 4                 | 10.8     |         | 20                | 5.3      | 4       | 4.0               |          | 23   | 5.8   | 5    | 5.8   |       | 20   | 5.2   | 4    | 4.2   |       | 25   | 6.2   | 3    | 4.0   |       | 20   | 5.2   | 4    | 4.2   |       |
| <b>2) HIV-related characteristics</b>       |              |                   |         |                   |          |              |                   |          |         |                   |              |         |                   |          |         |                   |          |         |                   |          |      |       |      |       |       |      |       |      |       |       |      |       |      |       |       |      |       |      |       |       |
| <b>HIV status</b>                           |              |                   |         |                   |          |              |                   |          |         |                   |              |         |                   |          |         |                   |          |         |                   |          |      |       |      |       |       |      |       |      |       |       |      |       |      |       |       |      |       |      |       |       |
| Negative                                    | 351          | 91.6              | 87      | 89.7              | 0.543    | 123          | 89.2              | 313      | 95.4    | 0.038             | 372          | 91.6    | 66                | 89.7     | 0.495   | 343               | 90.0     | 93      | 93.9              | 0.229    | 359  | 91.1  | 79   | 91.9  | 0.825 | 347  | 90.1  | 89   | 93.7  | 0.282 | 372  | 91.9  | 66   | 88.0  | 0.278 | 347  | 90.1  | 89   | 93.7  | 0.282 |
| Positive                                    | 32           | 8.4               | 10      | 10.3              |          | 6            | 10.8              | 38       | 4.7     |                   | 34           | 8.4     | 8                 | 10.3     |         | 38                | 10.0     | 6       | 6.1               |          | 35   | 8.9   | 7    | 8.1   |       | 38   | 9.9   | 6    | 6.3   |       | 33   | 8.2   | 9    | 12.0  |       | 38   | 9.9   | 6    | 6.3   |       |
| <b>Partner's HIV status</b>                 |              |                   |         |                   |          |              |                   |          |         |                   |              |         |                   |          |         |                   |          |         |                   |          |      |       |      |       |       |      |       |      |       |       |      |       |      |       |       |      |       |      |       |       |
| Negative                                    | 308          | 80.4              | 78      | 80.4              | 0.834    | 107          | 75.8              | 266      | 83.0    | 0.163             | 326          | 80.3    | 60                | 81.1     | 0.509   | 289               | 75.9     | 84      | 84.9              | 0.122    | 313  | 79.4  | 73   | 84.9  | 0.225 | 295  | 76.6  | 78   | 82.1  | 0.431 | 324  | 80.0  | 62   | 82.7  | 0.646 | 295  | 76.6  | 78   | 82.1  | 0.431 |
| Positive                                    | 26           | 6.8               | 8       | 8.3               |          | 6            | 9.4               | 33       | 4.7     |                   | 27           | 6.7     | 7                 | 9.5      |         | 35                | 9.2      | 4       | 4.0               |          | 27   | 6.9   | 7    | 8.1   |       | 34   | 8.8   | 5    | 5.3   |       | 28   | 6.9   | 6    | 8.0   |       | 34   | 8.8   | 5    | 5.3   |       |
| Don't know                                  | 49           | 12.8              | 11      | 11.3              |          | 16           | 14.8              | 52       | 12.4    |                   | 53           | 13.1    | 7                 | 9.5      |         | 57                | 15.0     | 11      | 11.1              |          | 54   | 13.7  | 6    | 7.0   |       | 56   | 14.6  | 12   | 12.6  |       | 53   | 13.1  | 7    | 9.3   |       | 56   | 14.6  | 12   | 12.6  |       |
| <b>Disclosure of HIV status</b>             |              |                   |         |                   |          |              |                   |          |         |                   |              |         |                   |          |         |                   |          |         |                   |          |      |       |      |       |       |      |       |      |       |       |      |       |      |       |       |      |       |      |       |       |
| No                                          | 18           | 4.7               | 3       | 3.1               | 0.489    | 4            | 4.3               | 15       | 3.1     | 0.559             | 19           | 4.7     | 2                 | 2.7      | 0.444   | 17                | 4.5      | 2       | 2.0               | 0.267    | 18   | 4.6   | 3    | 3.5   | 0.657 | 16   | 4.2   | 3    | 3.2   | 0.161 | 15   | 3.9   | 4    | 4.2   | 0.888 |      |       |      |       |       |
| Yes                                         | 365          | 95.3              | 94      | 96.9              |          | 125          | 95.7              | 336      | 96.9    |                   | 387          | 95.3    | 72                | 97.3     |         | 364               | 95.5     | 97      | 98.0              |          | 376  | 95.4  | 83   | 96.5  |       | 369  | 95.8  | 92   | 96.8  |       | 385  | 95.1  | 74   | 98.7  |       | 370  | 96.1  | 91   | 95.8  |       |
| <b>HIV/STI risk perception</b>              |              |                   |         |                   |          |              |                   |          |         |                   |              |         |                   |          |         |                   |          |         |                   |          |      |       |      |       |       |      |       |      |       |       |      |       |      |       |       |      |       |      |       |       |
| No risk at all                              | 47           | 12.3              | 15      | 15.5              | 0.748    | 20           | 19.1              | 67       | 15.5    | 0.789             | 47           | 11.6    | 15                | 20.3     | 0.193   | 71                | 18.6     | 16      | 16.2              | 0.922    | 43   | 10.9  | 19   | 22.1  | 0.044 | 70   | 18.2  | 17   | 17.9  | 0.949 | 48   | 11.9  | 14   | 18.7  | 0.395 | 70   | 18.2  | 17   | 17.9  | 0.999 |
| Small                                       | 140          | 36.6              | 37      | 38.1              |          | 48           | 37.0              | 130      | 37.2    |                   | 154          | 37.9    | 23                | 31.1     |         | 142               | 37.3     | 36      | 36.4              |          | 148  | 37.6  | 29   | 33.7  |       | 145  | 37.7  | 33   | 34.7  |       | 149  | 36.8  | 28   | 37.3  |       | 143  | 37.1  | 35   | 36.8  |       |
| Moderate                                    | 112          | 29.2              | 24      | 24.7              |          | 34           | 25.6              | 90       | 26.4    |                   | 117          | 28.8    | 19                | 25.7     |         | 97                | 25.5     | 27      | 27.3              |          | 116  | 29.4  | 20   | 23.3  |       | 98   | 25.5  | 26   | 27.4  |       | 117  | 28.9  | 19   | 25.3  |       | 99   | 25.7  | 25   | 26.3  |       |
| Great                                       | 84           | 21.9              | 21      | 21.7              |          | 27           | 18.2              | 64       | 20.9    |                   | 88           | 21.7    | 17                | 23.0     |         | 71                | 18.6     | 20      | 20.2              |          | 87   | 22.1  | 18   | 20.9  |       | 72   | 18.7  | 19   | 20.0  |       | 91   | 22.5  | 14   | 18.7  |       | 73   | 19.0  | 18   | 19.0  |       |
| <b>3) HEC use</b>                           |              |                   |         |                   |          |              |                   |          |         |                   |              |         |                   |          |         |                   |          |         |                   |          |      |       |      |       |       |      |       |      |       |       |      |       |      |       |       |      |       |      |       |       |
| <b>Type of HECs</b>                         |              |                   |         |                   |          |              |                   |          |         |                   |              |         |                   |          |         |                   |          |         |                   |          |      |       |      |       |       |      |       |      |       |       |      |       |      |       |       |      |       |      |       |       |
| Injectables                                 | 198          | 51.7              | 54      | 55.7              | 0.901    | 178          | 50.7              | 68       | 52.7    | 0.910             | 207          | 51.0    | 45                | 60.8     | 0.478   | 190               | 49.9     | 56      | 56.6              | 0.673    | 193  | 49.0  | 59   | 68.6  | 0.010 | 190  | 49.4  | 56   | 59.0  | 0.380 | 204  | 50.4  | 48   | 64.0  | 0.199 | 190  | 49.4  | 56   | 59.0  | 0.450 |
| Implants                                    | 127          | 33.2              | 28      | 28.9              |          | 107          | 30.5              | 41       | 31.8    |                   | 135          | 33.3    | 20                | 27.0     |         | 120               | 31.5     | 28      | 28.3              |          | 135  | 34.3  | 20   | 23.3  |       | 1    |       |      |       |       |      |       |      |       |       |      |       |      |       |       |

**Table S3.** Effects of intervention on dual-method contraceptive use at last sexual intercourse among women at 2 months after enrolment

| Variables                                      | Model 1              |          |         | Model 2              |                 |              |
|------------------------------------------------|----------------------|----------|---------|----------------------|-----------------|--------------|
|                                                | OR                   | (95% CI) | p-value | AOR <sup>a</sup>     | (95% CI)        | p-value      |
| <b>Intervention</b>                            |                      |          |         |                      |                 |              |
| Control                                        | Ref.                 |          |         | Ref.                 |                 |              |
| Intervention                                   | 4.62 ( 3.18 - 6.71 ) |          | <0.001  | 1.19 ( 0.48 - 2.95 ) |                 | 0.712        |
| <b>Time</b>                                    |                      |          |         | 2.89 ( 1.70 - 4.89 ) |                 | <0.001       |
| <b>Intervention*time<sup>b</sup></b>           |                      |          |         | 4.12 ( 2.02 - 8.39 ) |                 | <0.001       |
| <b>1) Socio-demographic characteristics</b>    |                      |          |         |                      |                 |              |
| <b>Age in years</b>                            |                      |          |         | 1.00 ( 0.96 - 1.04 ) |                 | 0.958        |
| <b>Education</b>                               |                      |          |         |                      |                 |              |
| Never                                          |                      |          |         | Ref.                 |                 |              |
| Primary and more                               |                      |          |         | 0.98 ( 0.66 - 1.47 ) |                 | 0.935        |
| <b>Religion</b>                                |                      |          |         |                      |                 |              |
| Christian                                      |                      |          |         | Ref.                 |                 |              |
| Muslim                                         |                      |          |         | 1.42 ( 0.78 - 2.58 ) |                 | 0.246        |
| <b>Wealth index</b>                            |                      |          |         |                      |                 |              |
| Poor                                           |                      |          |         | Ref.                 |                 |              |
| Middle                                         |                      |          |         | 1.35 ( 0.89 - 2.05 ) |                 | 0.164        |
| Rich                                           |                      |          |         | 1.31 ( 0.84 - 2.05 ) |                 | 0.240        |
| <b>No. of children</b>                         |                      |          |         | 0.87 ( 0.75 - 1.00 ) |                 | 0.057        |
| <b>Pregnancy intention</b>                     |                      |          |         |                      |                 |              |
| No                                             |                      |          |         | Ref.                 |                 |              |
| Yes                                            |                      |          |         | 1.17 ( 0.66 - 2.09 ) |                 | 0.592        |
| Don't know                                     |                      |          |         | 1.54 ( 0.71 - 3.34 ) |                 | 0.274        |
| <b>Partner's pregnancy intention</b>           |                      |          |         |                      |                 |              |
| No                                             |                      |          |         | Ref.                 |                 |              |
| Yes                                            |                      |          |         | 0.45 ( 0.24 - 0.85 ) |                 | <b>0.013</b> |
| Don't know                                     |                      |          |         | 0.49 ( 0.25 - 0.96 ) |                 | <b>0.038</b> |
| <b>History of unintended pregnancy</b>         |                      |          |         |                      |                 |              |
| No                                             |                      |          |         | Ref.                 |                 |              |
| Yes                                            |                      |          |         | 0.93 ( 0.64 - 1.34 ) |                 | 0.680        |
| <b>Multiple sex partners</b>                   |                      |          |         |                      |                 |              |
| No                                             |                      |          |         | Ref.                 |                 |              |
| Yes                                            |                      |          |         | 3.50 ( 1.85 - 6.62 ) |                 | <0.001       |
| <b>2) HIV-related characteristics</b>          |                      |          |         |                      |                 |              |
| <b>HIV status</b>                              |                      |          |         |                      |                 |              |
| Negative                                       |                      |          |         | Ref.                 |                 |              |
| Positive                                       |                      |          |         | 1.57 ( 0.71 - 3.49 ) |                 | 0.267        |
| <b>Partner's HIV status</b>                    |                      |          |         |                      |                 |              |
| Negative                                       |                      |          |         | Ref.                 |                 |              |
| Positive                                       |                      |          |         | 1.27 ( 0.54 - 2.99 ) |                 | 0.583        |
| Don't know                                     |                      |          |         | 0.95 ( 0.57 - 1.58 ) |                 | 0.837        |
| <b>HIV/STI risk perception</b>                 |                      |          |         |                      |                 |              |
| No risk at all                                 |                      |          |         | Ref.                 |                 |              |
| Small                                          |                      |          |         | 0.80 ( 0.47 - 1.37 ) |                 | 0.421        |
| Moderate                                       |                      |          |         | 1.05 ( 0.60 - 1.83 ) |                 | 0.858        |
| Great                                          |                      |          |         | 1.18 ( 0.65 - 2.15 ) |                 | 0.588        |
| <b>3) Non-barrier modern contraceptive use</b> |                      |          |         |                      |                 |              |
| <b>Methods in use</b>                          |                      |          |         |                      |                 |              |
| Injectables                                    |                      |          |         | Ref.                 |                 |              |
| Implants                                       |                      |          |         | 0.94 ( 0.65 - 1.35 ) |                 | 0.726        |
| IUDs                                           |                      |          |         | 1.21 ( 0.69 - 2.12 ) |                 | 0.505        |
| OCPs                                           |                      |          |         | 0.83 ( 0.40 - 1.72 ) |                 | 0.611        |
| Female sterilization                           |                      |          |         |                      | Perfect success |              |
| <b>4) Other psychosocial characteristics</b>   |                      |          |         |                      |                 |              |
| <b>HIV-related knowledge (HIV-KQ-18)</b>       |                      |          |         | 1.03 ( 0.97 - 1.11 ) |                 | 0.338        |
| <b>Condom use self-efficacy scale</b>          |                      |          |         | 1.02 ( 1.00 - 1.05 ) |                 | <b>0.035</b> |
| <b>Sexual Relationship Power Scale</b>         |                      |          |         |                      |                 |              |
| Low                                            |                      |          |         | Ref.                 |                 |              |
| Medium                                         |                      |          |         | 1.13 ( 0.76 - 1.69 ) |                 | 0.551        |
| High                                           |                      |          |         | 1.07 ( 0.70 - 1.66 ) |                 | 0.748        |

OR: odds ratio; AOR: adjusted odds ratio; SD: standard deviation; IUD: intrauterine device; OCP: oral contraceptive pill

a. Adjusted for cluster effect, individuals, age, education, religion, wealth index, number of children, pregnancy intention, partner's pregnancy intention, history of unintended pregnancy, multiple sex partnership, non-barrier modern contraceptive methods, HIV status, partner's HIV status, HIV/STI risk perception, HIV-related knowledge, condom use self-efficacy, and sexual relationship control power.

b. Intervention\*time represents the status of the intervention group at follow-up in comparison with the control group at baseline.

**Table S4.** Effects of intervention on dual-method contraceptive use at last sexual intercourse among women at 4 months after enrollement

| Variables                                      | Model 1 |               |         | Model 2          |                |              |
|------------------------------------------------|---------|---------------|---------|------------------|----------------|--------------|
|                                                | OR      | (95% CI)      | p-value | AOR <sup>a</sup> | (95% CI)       | p-value      |
| <b>Intervention</b>                            |         |               |         |                  |                |              |
| Control                                        | Ref.    |               |         | Ref.             |                |              |
| Intervention                                   | 2.13 (  | 1.49 - 3.06 ) | <0.001  | 1.66 (           | 0.87 - 3.16 )  | 0.121        |
| <b>Time</b>                                    |         |               |         | 3.55 (           | 2.08 - 6.08 )  | <0.001       |
| <b>Intervention*time<sup>b</sup></b>           |         |               |         | 1.66 (           | 0.84 - 3.30 )  | 0.146        |
| <b>1) Socio-demographic characteristics</b>    |         |               |         |                  |                |              |
| <b>Age in years</b>                            |         |               |         | 0.99 (           | 0.95 - 1.03 )  | 0.530        |
| <b>Education</b>                               |         |               |         | Ref.             |                |              |
| Never                                          |         |               |         | Ref.             |                |              |
| Primary and more                               |         |               |         | 0.79 (           | 0.51 - 1.22 )  | 0.278        |
| <b>Religion</b>                                |         |               |         | Ref.             |                |              |
| Christian                                      |         |               |         | Ref.             |                |              |
| Muslim                                         |         |               |         | 1.28 (           | 0.66 - 2.49 )  | 0.465        |
| <b>Wealth index</b>                            |         |               |         | Ref.             |                |              |
| Poor                                           |         |               |         | Ref.             |                |              |
| Middle                                         |         |               |         | 1.12 (           | 0.71 - 1.76 )  | 0.624        |
| Rich                                           |         |               |         | 1.14 (           | 0.70 - 1.85 )  | 0.608        |
| <b>No. of children</b>                         |         |               |         | 0.92 (           | 0.78 - 1.08 )  | 0.314        |
| <b>Pregnancy intention</b>                     |         |               |         | Ref.             |                |              |
| No                                             |         |               |         | Ref.             |                |              |
| Yes                                            |         |               |         | 0.75 (           | 0.40 - 1.42 )  | 0.376        |
| Don't know                                     |         |               |         | 1.17 (           | 0.51 - 2.66 )  | 0.715        |
| <b>Partner's pregnancy intention</b>           |         |               |         | Ref.             |                |              |
| No                                             |         |               |         | Ref.             |                |              |
| Yes                                            |         |               |         | 0.55 (           | 0.28 - 1.09 )  | 0.085        |
| Don't know                                     |         |               |         | 0.55 (           | 0.26 - 1.15 )  | 0.113        |
| <b>History of unintended pregnancy</b>         |         |               |         | Ref.             |                |              |
| No                                             |         |               |         | Ref.             |                |              |
| Yes                                            |         |               |         | 0.62 (           | 0.40 - 0.94 )  | <b>0.026</b> |
| <b>Multiple sex partners</b>                   |         |               |         | Ref.             |                |              |
| No                                             |         |               |         | Ref.             |                |              |
| Yes                                            |         |               |         | 2.87 (           | 1.45 - 5.67 )  | <b>0.002</b> |
| <b>2) HIV-related characteristics</b>          |         |               |         |                  |                |              |
| <b>HIV status</b>                              |         |               |         | Ref.             |                |              |
| Negative                                       |         |               |         | Ref.             |                |              |
| Positive                                       |         |               |         | 1.61 (           | 0.69 - 3.80 )  | 0.273        |
| <b>Partner's HIV status</b>                    |         |               |         | Ref.             |                |              |
| Negative                                       |         |               |         | Ref.             |                |              |
| Positive                                       |         |               |         | 1.40 (           | 0.55 - 3.52 )  | 0.480        |
| Don't know                                     |         |               |         | 1.26 (           | 0.74 - 2.15 )  | 0.389        |
| <b>HIV/STI risk perception</b>                 |         |               |         | Ref.             |                |              |
| No risk at all                                 |         |               |         | Ref.             |                |              |
| Small                                          |         |               |         | 0.84 (           | 0.47 - 1.49 )  | 0.544        |
| Moderate                                       |         |               |         | 1.01 (           | 0.56 - 1.83 )  | 0.975        |
| Great                                          |         |               |         | 0.96 (           | 0.50 - 1.84 )  | 0.894        |
| <b>3) Non-barrier modern contraceptive use</b> |         |               |         |                  |                |              |
| <b>Methods in use</b>                          |         |               |         | Ref.             |                |              |
| Injectables                                    |         |               |         | Ref.             |                |              |
| Implants                                       |         |               |         | 0.94 (           | 0.62 - 1.44 )  | 0.788        |
| IUDs                                           |         |               |         | 1.18 (           | 0.63 - 2.21 )  | 0.603        |
| OCPs                                           |         |               |         | 2.35 (           | 1.17 - 4.74 )  | <b>0.017</b> |
| Female sterilization                           |         |               |         | 0.97 (           | 0.05 - 19.29 ) | 0.986        |
| <b>4) Other psychosocial characteristics</b>   |         |               |         |                  |                |              |
| <b>HIV-related knowledge (HIV-KQ-18)</b>       |         |               |         | 1.01 (           | 0.94 - 1.08 )  | 0.858        |
| <b>Condom use self-efficacy scale</b>          |         |               |         | 1.04 (           | 1.01 - 1.06 )  | <b>0.002</b> |
| <b>Sexual Relationship Power Scale</b>         |         |               |         | Ref.             |                |              |
| Low                                            |         |               |         | Ref.             |                |              |
| Medium                                         |         |               |         | 1.44 (           | 0.91 - 2.27 )  | 0.119        |
| High                                           |         |               |         | 1.21 (           | 0.74 - 1.98 )  | 0.443        |

OR: odds ratio; AOR: adjusted odds ratio; SD: standard deviation; IUD: intrauterine device; OCP: oral contraceptive pill

a. Adjusted for cluster effect, individuals, age, education, religion, wealth index, number of children, pregnancy intention, partner's pregnancy intention, history of unintended pregnancy, multiple sex partnership, non-barrier modern contraceptive methods, HIV status, partner's HIV status, HIV/STI risk perception, HIV-related knowledge, condom use self-efficacy, and sexual relationship control power.

b. Intervention\*time represents the status of the intervention group at follow-up in comparison with the control group at baseline.

**Table S5.** Effects of intervention on dual-method contraceptive use at last sexual intercourse among women at 6 months after enrollement

| Variables                                      | Model 1              |          |         | Model 2                     |          |                 |
|------------------------------------------------|----------------------|----------|---------|-----------------------------|----------|-----------------|
|                                                | OR                   | (95% CI) | p-value | AOR <sup>a</sup>            | (95% CI) | p-value         |
| <b>Intervention</b>                            |                      |          |         |                             |          |                 |
| Control                                        | Ref.                 |          |         | Ref.                        |          |                 |
| Intervention                                   | 2.53 ( 1.69 - 3.79 ) |          | <0.001  | 1.40 ( 0.53 - 3.67 )        |          | 0.494           |
| <b>Time</b>                                    |                      |          |         |                             |          |                 |
| Intervention*time <sup>b</sup>                 |                      |          |         | 2.03 ( 0.99 - 4.14 )        |          | 0.052           |
| <b>1) Socio-demographic characteristics</b>    |                      |          |         |                             |          |                 |
| <b>Age in years</b>                            |                      |          |         | 0.97 ( 0.93 - 1.02 )        |          | 0.208           |
| <b>Education</b>                               |                      |          |         |                             |          |                 |
| Never                                          |                      |          |         | Ref.                        |          |                 |
| Primary and more                               |                      |          |         | 0.89 ( 0.56 - 1.41 )        |          | 0.618           |
| <b>Religion</b>                                |                      |          |         |                             |          |                 |
| Christian                                      |                      |          |         | Ref.                        |          |                 |
| Muslim                                         |                      |          |         | 1.36 ( 0.70 - 2.65 )        |          | 0.366           |
| <b>Wealth index</b>                            |                      |          |         |                             |          |                 |
| Poor                                           |                      |          |         | Ref.                        |          |                 |
| Middle                                         |                      |          |         | 0.96 ( 0.60 - 1.55 )        |          | 0.875           |
| Rich                                           |                      |          |         | 0.75 ( 0.45 - 1.27 )        |          | 0.283           |
| <b>No. of children</b>                         |                      |          |         | 1.02 ( 0.86 - 1.20 )        |          | 0.853           |
| <b>Pregnancy intention</b>                     |                      |          |         |                             |          |                 |
| No                                             |                      |          |         | Ref.                        |          |                 |
| Yes                                            |                      |          |         | 0.84 ( 0.44 - 1.61 )        |          | 0.602           |
| Don't know                                     |                      |          |         | 1.29 ( 0.55 - 3.03 )        |          | 0.565           |
| <b>Partner's pregnancy intention</b>           |                      |          |         |                             |          |                 |
| No                                             |                      |          |         | Ref.                        |          |                 |
| Yes                                            |                      |          |         | 0.69 ( 0.34 - 1.41 )        |          | 0.307           |
| Don't know                                     |                      |          |         | 0.62 ( 0.29 - 1.35 )        |          | 0.228           |
| <b>History of unintended pregnancy</b>         |                      |          |         |                             |          |                 |
| No                                             |                      |          |         | Ref.                        |          |                 |
| Yes                                            |                      |          |         | 0.73 ( 0.48 - 1.13 )        |          | 0.157           |
| <b>Multiple sex partners</b>                   |                      |          |         |                             |          |                 |
| No                                             |                      |          |         | Ref.                        |          |                 |
| Yes                                            |                      |          |         | 2.96 ( 1.50 - 5.85 )        |          | <b>0.002</b>    |
| <b>2) HIV-related characteristics</b>          |                      |          |         |                             |          |                 |
| <b>HIV status</b>                              |                      |          |         |                             |          |                 |
| Negative                                       |                      |          |         | Ref.                        |          |                 |
| Positive                                       |                      |          |         | 1.24 ( 0.52 - 2.97 )        |          | 0.629           |
| <b>Partner's HIV status</b>                    |                      |          |         |                             |          |                 |
| Negative                                       |                      |          |         | Ref.                        |          |                 |
| Positive                                       |                      |          |         | 1.67 ( 0.64 - 4.31 )        |          | 0.292           |
| Don't know                                     |                      |          |         | <b>1.09</b> ( 0.62 - 1.92 ) |          | 0.758           |
| <b>HIV/STI risk perception</b>                 |                      |          |         |                             |          |                 |
| No risk at all                                 |                      |          |         | Ref.                        |          |                 |
| Small                                          |                      |          |         | 0.76 ( 0.41 - 1.40 )        |          | 0.377           |
| Moderate                                       |                      |          |         | 1.03 ( 0.55 - 1.92 )        |          | 0.937           |
| Great                                          |                      |          |         | 0.77 ( 0.38 - 1.53 )        |          | 0.452           |
| <b>3) Non-barrier modern contraceptive use</b> |                      |          |         |                             |          |                 |
| <b>Methods in use</b>                          |                      |          |         |                             |          |                 |
| Injectables                                    |                      |          |         | Ref.                        |          |                 |
| Implants                                       |                      |          |         | 0.92 ( 0.60 - 1.42 )        |          | 0.715           |
| IUDs                                           |                      |          |         | 1.19 ( 0.63 - 2.25 )        |          | 0.589           |
| OCPs                                           |                      |          |         | 2.03 ( 0.99 - 4.17 )        |          | 0.054           |
| Female sterilization                           |                      |          |         |                             |          | Perfect success |
| <b>4) Other psychosocial characteristics</b>   |                      |          |         |                             |          |                 |
| <b>HIV-related knowledge (HIV-KQ-18)</b>       |                      |          |         | 1.05 ( 0.97 - 1.13 )        |          | 0.226           |
| <b>Condom use self-efficacy scale</b>          |                      |          |         | 1.04 ( 1.01 - 1.06 )        |          | <b>0.006</b>    |
| <b>Sexual Relationship Power Scale</b>         |                      |          |         |                             |          |                 |
| Low                                            |                      |          |         | Ref.                        |          |                 |
| Medium                                         |                      |          |         | 1.59 ( 0.99 - 2.54 )        |          | 0.056           |
| High                                           |                      |          |         | 1.19 ( 0.71 - 1.97 )        |          | 0.513           |

OR: odds ratio; AOR: adjusted odds ratio; SD: standard deviation; IUD: intrauterine device; OCP: oral contraceptive pill

a. Adjusted for cluster effect, individuals, age, education, religion, wealth index, number of children, pregnancy intention, partner's pregnancy intention, history of unintended pregnancy, multiple sex partnership, non-barrier modern contraceptive methods, HIV status, partner's HIV status, HIV/STI risk perception, HIV-related knowledge, condom use self-efficacy, and sexual relationship control power.

b. Intervention\*time represents the status of the intervention group at follow-up in comparison with the control group at baseline.



**Table S6.** Effects of intervention on dual-method contraceptive use at last sexual intercourse among women at 8 months after enrollement

| Variables                                      | Model 1              |          |         | Model 2              |          |                 |
|------------------------------------------------|----------------------|----------|---------|----------------------|----------|-----------------|
|                                                | OR                   | (95% CI) | p-value | AOR <sup>a</sup>     | (95% CI) | p-value         |
| <b>Intervention</b>                            |                      |          |         |                      |          |                 |
| Control                                        | Ref.                 |          |         | Ref.                 |          |                 |
| Intervention                                   | 2.76 ( 1.79 - 4.26 ) |          | <0.001  | 1.39 ( 0.59 - 3.31 ) |          | 0.452           |
| <b>Time</b>                                    |                      |          |         |                      |          |                 |
| Intervention*time <sup>b</sup>                 |                      |          |         | 2.16 ( 1.06 - 4.41 ) |          | <b>0.034</b>    |
| <b>1) Socio-demographic characteristics</b>    |                      |          |         |                      |          |                 |
| <b>Age in years</b>                            |                      |          |         | 0.97 ( 0.93 - 1.01 ) |          | 0.114           |
| <b>Education</b>                               |                      |          |         |                      |          |                 |
| Never                                          |                      |          |         | Ref.                 |          |                 |
| Primary and more                               |                      |          |         | 1.03 ( 0.66 - 1.62 ) |          | 0.884           |
| <b>Religion</b>                                |                      |          |         |                      |          |                 |
| Christian                                      |                      |          |         | Ref.                 |          |                 |
| Muslim                                         |                      |          |         | 1.13 ( 0.57 - 2.21 ) |          | 0.728           |
| <b>Wealth index</b>                            |                      |          |         |                      |          |                 |
| Poor                                           |                      |          |         | Ref.                 |          |                 |
| Middle                                         |                      |          |         | 1.11 ( 0.71 - 1.75 ) |          | 0.647           |
| Rich                                           |                      |          |         | 0.89 ( 0.54 - 1.48 ) |          | 0.664           |
| <b>No. of children</b>                         |                      |          |         | 1.04 ( 0.88 - 1.22 ) |          | 0.676           |
| <b>Pregnancy intention</b>                     |                      |          |         |                      |          |                 |
| No                                             |                      |          |         | Ref.                 |          |                 |
| Yes                                            |                      |          |         | 0.82 ( 0.44 - 1.55 ) |          | 0.550           |
| Don't know                                     |                      |          |         | 1.66 ( 0.75 - 3.65 ) |          | 0.210           |
| <b>Partner's pregnancy intention</b>           |                      |          |         |                      |          |                 |
| No                                             |                      |          |         | Ref.                 |          |                 |
| Yes                                            |                      |          |         | 0.65 ( 0.33 - 1.28 ) |          | 0.214           |
| Don't know                                     |                      |          |         | 0.71 ( 0.35 - 1.47 ) |          | 0.359           |
| <b>History of unintended pregnancy</b>         |                      |          |         |                      |          |                 |
| No                                             |                      |          |         | Ref.                 |          |                 |
| Yes                                            |                      |          |         | 0.83 ( 0.55 - 1.25 ) |          | 0.375           |
| <b>Multiple sex partners</b>                   |                      |          |         |                      |          |                 |
| No                                             |                      |          |         | Ref.                 |          |                 |
| Yes                                            |                      |          |         | 3.22 ( 1.69 - 6.12 ) |          | <0.001          |
| <b>2) HIV-related characteristics</b>          |                      |          |         |                      |          |                 |
| <b>HIV status</b>                              |                      |          |         |                      |          |                 |
| Negative                                       |                      |          |         | Ref.                 |          |                 |
| Positive                                       |                      |          |         | 0.97 ( 0.40 - 2.31 ) |          | 0.938           |
| <b>Partner's HIV status</b>                    |                      |          |         |                      |          |                 |
| Negative                                       |                      |          |         | Ref.                 |          |                 |
| Positive                                       |                      |          |         | 2.04 ( 0.82 - 5.09 ) |          | 0.128           |
| Don't know                                     |                      |          |         | 1.04 ( 0.60 - 1.81 ) |          | 0.887           |
| <b>HIV/STI risk perception</b>                 |                      |          |         |                      |          |                 |
| No risk at all                                 |                      |          |         | Ref.                 |          |                 |
| Small                                          |                      |          |         | 0.68 ( 0.39 - 1.20 ) |          | 0.187           |
| Moderate                                       |                      |          |         | 0.79 ( 0.44 - 1.42 ) |          | 0.437           |
| Great                                          |                      |          |         | 0.77 ( 0.41 - 1.47 ) |          | 0.429           |
| <b>3) Non-barrier modern contraceptive use</b> |                      |          |         |                      |          |                 |
| <b>Methods in use</b>                          |                      |          |         |                      |          |                 |
| Injectables                                    |                      |          |         | Ref.                 |          |                 |
| Implants                                       |                      |          |         | 0.86 ( 0.56 - 1.31 ) |          | 0.483           |
| IUDs                                           |                      |          |         | 1.23 ( 0.67 - 2.25 ) |          | 0.511           |
| OCPs                                           |                      |          |         | 1.36 ( 0.66 - 2.80 ) |          | 0.408           |
| Female sterilization                           |                      |          |         |                      |          | Perfect success |
| <b>4) Other psychosocial charactericts</b>     |                      |          |         |                      |          |                 |
| <b>HIV-related knowledge (HIV-KQ-18)</b>       |                      |          |         | 1.04 ( 0.96 - 1.12 ) |          | 0.312           |
| <b>Condom use self-efficacy scale</b>          |                      |          |         | 1.03 ( 1.00 - 1.05 ) |          | <b>0.029</b>    |
| <b>Sexual Relationship Power Scale</b>         |                      |          |         |                      |          |                 |
| Low                                            |                      |          |         | Ref.                 |          |                 |
| Medium                                         |                      |          |         | 1.29 ( 0.81 - 2.05 ) |          | 0.290           |
| High                                           |                      |          |         | 1.42 ( 0.87 - 2.31 ) |          | 0.165           |

OR: odds ratio; AOR: adjusted odds ratio; SD: standard deviation; IUD: intrauterine device; OCP: oral contraceptive pill

a. Adjusted for cluster effect, individuals, age, education, religion, wealth index, number of children, pregnancy intention, partner's pregnancy intention, history of unintended pregnancy, multiple sex partnership, non-barrier modern contraceptive methods, HIV status, partner's HIV status, HIV/STI risk perception, HIV-related knowledge, condom use self-efficacy, and sexual relationship control power.

b. Intervention\*time represents the status of the intervention group at follow-up in comparison with the control group at baseline.

**Table S7.** Effects of intervention on consistent dual-method contraceptive use among women at 2 months after enrollement

| Variables                                      | Model 1                |          |         | Model 2                |                 |              |
|------------------------------------------------|------------------------|----------|---------|------------------------|-----------------|--------------|
|                                                | OR                     | (95% CI) | p-value | AOR <sup>a</sup>       | (95% CI)        | p-value      |
| <b>Intervention</b>                            |                        |          |         |                        |                 |              |
| Control                                        | Ref.                   |          |         | Ref.                   |                 |              |
| Intervention                                   | 11.98 ( 4.74 - 30.29 ) |          | <0.001  | 14.53 ( 3.63 - 58.13 ) |                 | <0.001       |
| <b>1) Socio-demographic characteristics</b>    |                        |          |         |                        |                 |              |
| <b>Age in years</b>                            |                        |          |         | 1.01 ( 0.94 - 1.08 )   |                 | 0.856        |
| <b>Education</b>                               |                        |          |         |                        |                 |              |
| Never                                          |                        |          |         | Ref.                   |                 |              |
| Primary and more                               |                        |          |         | 0.69 ( 0.34 - 1.39 )   |                 | 0.298        |
| <b>Religion</b>                                |                        |          |         |                        |                 |              |
| Christian                                      |                        |          |         | Ref.                   |                 |              |
| Muslim                                         |                        |          |         | 0.93 ( 0.30 - 2.85 )   |                 | 0.898        |
| <b>Wealth index</b>                            |                        |          |         |                        |                 |              |
| Poor                                           |                        |          |         | Ref.                   |                 |              |
| Middle                                         |                        |          |         | 1.47 ( 0.70 - 3.11 )   |                 | 0.307        |
| Rich                                           |                        |          |         | 1.37 ( 0.61 - 3.09 )   |                 | 0.441        |
| <b>No. of children</b>                         |                        |          |         | 0.89 ( 0.69 - 1.16 )   |                 | 0.396        |
| <b>Pregnancy intention</b>                     |                        |          |         |                        |                 |              |
| No                                             |                        |          |         | Ref.                   |                 |              |
| Yes                                            |                        |          |         | 0.56 ( 0.20 - 1.54 )   |                 | 0.264        |
| Don't know                                     |                        |          |         | 1.51 ( 0.39 - 5.84 )   |                 | 0.551        |
| <b>Partner's pregnancy intention</b>           |                        |          |         |                        |                 |              |
| No                                             |                        |          |         | Ref.                   |                 |              |
| Yes                                            |                        |          |         | 0.89 ( 0.30 - 2.64 )   |                 | 0.834        |
| Don't know                                     |                        |          |         | 0.59 ( 0.17 - 2.05 )   |                 | 0.405        |
| <b>History of unintended pregnancy</b>         |                        |          |         |                        |                 |              |
| No                                             |                        |          |         | Ref.                   |                 |              |
| Yes                                            |                        |          |         | 0.76 ( 0.39 - 1.48 )   |                 | 0.421        |
| <b>Multiple sex partners</b>                   |                        |          |         |                        |                 |              |
| No                                             |                        |          |         | Ref.                   |                 |              |
| Yes                                            |                        |          |         | 3.21 ( 1.06 - 9.67 )   |                 | <b>0.039</b> |
| <b>2) HIV-related characteristics</b>          |                        |          |         |                        |                 |              |
| <b>HIV status</b>                              |                        |          |         |                        |                 |              |
| Negative                                       |                        |          |         | Ref.                   |                 |              |
| Positive                                       |                        |          |         | 1.47 ( 0.39 - 5.52 )   |                 | 0.566        |
| <b>Partner's HIV status</b>                    |                        |          |         |                        |                 |              |
| Negative                                       |                        |          |         | Ref.                   |                 |              |
| Positive                                       |                        |          |         | 1.23 ( 0.28 - 5.43 )   |                 | 0.785        |
| Don't know                                     |                        |          |         | 1.15 ( 0.48 - 2.77 )   |                 | 0.747        |
| <b>HIV/STI risk perception</b>                 |                        |          |         |                        |                 |              |
| No risk at all                                 |                        |          |         | Ref.                   |                 |              |
| Small                                          |                        |          |         | 1.98 ( 0.57 - 6.91 )   |                 | 0.283        |
| Moderate                                       |                        |          |         | 2.37 ( 0.67 - 8.43 )   |                 | 0.181        |
| Great                                          |                        |          |         | 4.04 ( 1.10 - 14.82 )  |                 | <b>0.035</b> |
| <b>3) Non-barrier modern contraceptive use</b> |                        |          |         |                        |                 |              |
| <b>Methods in use</b>                          |                        |          |         |                        |                 |              |
| Injectables                                    |                        |          |         | Ref.                   |                 |              |
| Implants                                       |                        |          |         | 0.53 ( 0.27 - 1.04 )   |                 | 0.064        |
| IUDs                                           |                        |          |         | 0.47 ( 0.14 - 1.57 )   |                 | 0.219        |
| OCPs                                           |                        |          |         | 0.16 ( 0.02 - 1.37 )   |                 | 0.093        |
| Female sterilization                           |                        |          |         |                        | Perfect success |              |
| <b>4) Other psychosocial characteristics</b>   |                        |          |         |                        |                 |              |
| <b>HIV-related knowledge (HIV-KQ-18)</b>       |                        |          |         | 1.02 ( 0.90 - 1.16 )   |                 | 0.722        |
| <b>Condom use self-efficacy scale</b>          |                        |          |         | 0.98 ( 0.94 - 1.02 )   |                 | 0.359        |
| <b>Sexual Relationship Power Scale</b>         |                        |          |         |                        |                 |              |
| Low                                            |                        |          |         | Ref.                   |                 |              |
| Medium                                         |                        |          |         | 1.36 ( 0.62 - 2.95 )   |                 | 0.445        |
| High                                           |                        |          |         | 1.87 ( 0.84 - 4.17 )   |                 | 0.124        |

OR: odds ratio; AOR: adjusted odds ratio; SD: standard deviation; IUD: intrauterine device; OCP: oral contraceptive pill

a. Adjusted for cluster effect, individuals, age, education, religion, wealth index, number of children, pregnancy intention, partner's pregnancy intention, history of unintended pregnancy, multiple sex partnership, non-barrier modern contraceptive methods, HIV status, partner's HIV status, HIV/STI risk perception, HIV-related knowledge, condom use self-efficacy, and sexual relationship control power.

**Table S8.** Effects of intervention on consistent dual-method contraceptive use among women at 4 months after enrolment

| Variables                                      | Model 1               |          |         | Model 2               |                 |         |
|------------------------------------------------|-----------------------|----------|---------|-----------------------|-----------------|---------|
|                                                | OR                    | (95% CI) | p-value | AOR <sup>a</sup>      | (95% CI)        | p-value |
| <b>Intervention</b>                            |                       |          |         |                       |                 |         |
| Control                                        | Ref.                  |          |         | Ref.                  |                 |         |
| Intervention                                   | 5.22 ( 2.42 - 11.28 ) |          | <0.001  | 6.30 ( 2.20 - 18.03 ) |                 | 0.001   |
| <b>1) Socio-demographic characteristics</b>    |                       |          |         |                       |                 |         |
| <b>Age in years</b>                            |                       |          |         | 1.05 ( 0.98 - 1.12 )  |                 | 0.181   |
| <b>Education</b>                               |                       |          |         |                       |                 |         |
| Never                                          |                       |          |         | Ref.                  |                 |         |
| Primary and more                               |                       |          |         | 0.56 ( 0.28 - 1.13 )  |                 | 0.104   |
| <b>Religion</b>                                |                       |          |         |                       |                 |         |
| Christian                                      |                       |          |         | Ref.                  |                 |         |
| Muslim                                         |                       |          |         | 0.73 ( 0.19 - 2.82 )  |                 | 0.651   |
| <b>Wealth index</b>                            |                       |          |         |                       |                 |         |
| Poor                                           |                       |          |         | Ref.                  |                 |         |
| Middle                                         |                       |          |         | 1.63 ( 0.74 - 3.56 )  |                 | 0.224   |
| Rich                                           |                       |          |         | 1.51 ( 0.65 - 3.54 )  |                 | 0.340   |
| <b>No. of children</b>                         |                       |          |         |                       |                 |         |
| 0                                              |                       |          |         | 0.79 ( 0.59 - 1.05 )  |                 | 0.104   |
| <b>Pregnancy intention</b>                     |                       |          |         |                       |                 |         |
| No                                             |                       |          |         | Ref.                  |                 |         |
| Yes                                            |                       |          |         | 0.37 ( 0.13 - 1.06 )  |                 | 0.063   |
| Don't know                                     |                       |          |         | 0.61 ( 0.16 - 2.43 )  |                 | 0.488   |
| <b>Partner's pregnancy intention</b>           |                       |          |         |                       |                 |         |
| No                                             |                       |          |         | Ref.                  |                 |         |
| Yes                                            |                       |          |         | 1.45 ( 0.47 - 4.49 )  |                 | 0.523   |
| Don't know                                     |                       |          |         | 1.08 ( 0.32 - 3.67 )  |                 | 0.907   |
| <b>History of unintended pregnancy</b>         |                       |          |         |                       |                 |         |
| No                                             |                       |          |         | Ref.                  |                 |         |
| Yes                                            |                       |          |         | 0.52 ( 0.24 - 1.12 )  |                 | 0.094   |
| <b>Multiple sex partners</b>                   |                       |          |         |                       |                 |         |
| No                                             |                       |          |         | Ref.                  |                 |         |
| Yes                                            |                       |          |         | 0.37 ( 0.05 - 3.05 )  |                 | 0.356   |
| <b>2) HIV-related characteristics</b>          |                       |          |         |                       |                 |         |
| <b>HIV status</b>                              |                       |          |         |                       |                 |         |
| Negative                                       |                       |          |         | Ref.                  |                 |         |
| Positive                                       |                       |          |         | 1.01 ( 0.24 - 4.31 )  |                 | 0.985   |
| <b>Partner's HIV status</b>                    |                       |          |         |                       |                 |         |
| Negative                                       |                       |          |         | Ref.                  |                 |         |
| Positive                                       |                       |          |         | 1.84 ( 0.36 - 9.30 )  |                 | 0.462   |
| Don't know                                     |                       |          |         | 1.63 ( 0.68 - 3.92 )  |                 | 0.275   |
| <b>HIV/STI risk perception</b>                 |                       |          |         |                       |                 |         |
| No risk at all                                 |                       |          |         | Ref.                  |                 |         |
| Small                                          |                       |          |         | 2.14 ( 0.58 - 7.93 )  |                 | 0.253   |
| Moderate                                       |                       |          |         | 2.15 ( 0.56 - 8.32 )  |                 | 0.268   |
| Great                                          |                       |          |         | 1.65 ( 0.39 - 7.03 )  |                 | 0.499   |
| <b>3) Non-barrier modern contraceptive use</b> |                       |          |         |                       |                 |         |
| <b>Methods in use</b>                          |                       |          |         |                       |                 |         |
| Injectables                                    |                       |          |         | Ref.                  |                 |         |
| Implants                                       |                       |          |         | 1.01 ( 0.49 - 2.06 )  |                 | 0.987   |
| IUDs                                           |                       |          |         | 1.58 ( 0.54 - 4.62 )  |                 | 0.400   |
| OCPs                                           |                       |          |         | 0.66 ( 0.13 - 3.32 )  |                 | 0.618   |
| Female sterilization                           |                       |          |         |                       | Perfect success |         |
| <b>4) Other psychosocial characteristics</b>   |                       |          |         |                       |                 |         |
| <b>HIV-related knowledge (HIV-KQ-18)</b>       |                       |          |         |                       |                 |         |
| Low                                            |                       |          |         | 0.92 ( 0.81 - 1.03 )  |                 | 0.148   |
| Medium                                         |                       |          |         | 1.02 ( 0.97 - 1.06 )  |                 | 0.443   |
| High                                           |                       |          |         | 0.96 ( 0.42 - 2.21 )  |                 | 0.932   |

OR: odds ratio; AOR: adjusted odds ratio; SD: standard deviation; IUD: intrauterine device; OCP: oral contraceptive pill

a. Adjusted for cluster effect, individuals, age, education, religion, wealth index, number of children, pregnancy intention, partner's pregnancy intention, history of unintended pregnancy, multiple sex partnership, non-barrier modern contraceptive methods, HIV status, partner's HIV status, HIV/STI risk perception, HIV-related knowledge, condom use self-efficacy, and sexual relationship control power.

**Table S9.** Effects of intervention on consistent dual-method contraceptive use among women at 6 months after enrolment

| Variables                                      | Model 1               |          |         | Model 2               |                 |         |
|------------------------------------------------|-----------------------|----------|---------|-----------------------|-----------------|---------|
|                                                | OR                    | (95% CI) | p-value | AOR <sup>a</sup>      | (95% CI)        | p-value |
| <b>Intervention</b>                            |                       |          |         |                       |                 |         |
| Control                                        | Ref.                  |          |         | Ref.                  |                 |         |
| Intervention                                   | 6.58 ( 2.53 - 17.07 ) |          | <0.001  | 8.04 ( 1.17 - 55.08 ) |                 | 0.034   |
| <b>1) Socio-demographic characteristics</b>    |                       |          |         |                       |                 |         |
| <b>Age in years</b>                            |                       |          |         | 1.05 ( 0.96 - 1.15 )  |                 | 0.311   |
| <b>Education</b>                               |                       |          |         |                       |                 |         |
| Never                                          |                       |          |         | Ref.                  |                 |         |
| Primary and more                               |                       |          |         | 1.18 ( 0.45 - 3.13 )  |                 | 0.738   |
| <b>Religion</b>                                |                       |          |         |                       |                 |         |
| Christian                                      |                       |          |         | Ref.                  |                 |         |
| Muslim                                         |                       |          |         | 1.75 ( 0.46 - 6.61 )  |                 | 0.409   |
| <b>Wealth index</b>                            |                       |          |         |                       |                 |         |
| Poor                                           |                       |          |         | Ref.                  |                 |         |
| Middle                                         |                       |          |         | 1.35 ( 0.53 - 3.47 )  |                 | 0.528   |
| Rich                                           |                       |          |         | 0.75 ( 0.26 - 2.20 )  |                 | 0.604   |
| <b>No. of children</b>                         |                       |          |         | 0.90 ( 0.64 - 1.28 )  |                 | 0.560   |
| <b>Pregnancy intention</b>                     |                       |          |         |                       |                 |         |
| No                                             |                       |          |         | Ref.                  |                 |         |
| Yes                                            |                       |          |         | 0.73 ( 0.18 - 2.92 )  |                 | 0.657   |
| Don't know                                     |                       |          |         | 1.31 ( 0.23 - 7.51 )  |                 | 0.763   |
| <b>Partner's pregnancy intention</b>           |                       |          |         |                       |                 |         |
| No                                             |                       |          |         | Ref.                  |                 |         |
| Yes                                            |                       |          |         | 1.27 ( 0.30 - 5.40 )  |                 | 0.743   |
| Don't know                                     |                       |          |         | 0.84 ( 0.17 - 4.17 )  |                 | 0.836   |
| <b>History of unintended pregnancy</b>         |                       |          |         |                       |                 |         |
| No                                             |                       |          |         | Ref.                  |                 |         |
| Yes                                            |                       |          |         | 0.79 ( 0.32 - 1.96 )  |                 | 0.607   |
| <b>Multiple sex partners</b>                   |                       |          |         |                       |                 |         |
| No                                             |                       |          |         | Ref.                  |                 |         |
| Yes                                            |                       |          |         | 1.59 ( 0.29 - 8.78 )  |                 | 0.597   |
| <b>2) HIV-related characteristics</b>          |                       |          |         |                       |                 |         |
| <b>HIV status</b>                              |                       |          |         |                       |                 |         |
| Negative                                       |                       |          |         | Ref.                  |                 |         |
| Positive                                       |                       |          |         | 4.08 ( 0.86 - 19.27 ) |                 | 0.076   |
| <b>Partner's HIV status</b>                    |                       |          |         |                       |                 |         |
| Negative                                       |                       |          |         | Ref.                  |                 |         |
| Positive                                       |                       |          |         | 0.51 ( 0.07 - 3.47 )  |                 | 0.489   |
| Don't know                                     |                       |          |         | 0.93 ( 0.30 - 2.92 )  |                 | 0.901   |
| <b>HIV/STI risk perception</b>                 |                       |          |         |                       |                 |         |
| No risk at all                                 |                       |          |         | Ref.                  |                 |         |
| Small                                          |                       |          |         | 1.21 ( 0.29 - 5.09 )  |                 | 0.791   |
| Moderate                                       |                       |          |         | 0.91 ( 0.20 - 4.25 )  |                 | 0.907   |
| Great                                          |                       |          |         | 0.98 ( 0.20 - 4.82 )  |                 | 0.983   |
| <b>3) Non-barrier modern contraceptive use</b> |                       |          |         |                       |                 |         |
| <b>Methods in use</b>                          |                       |          |         |                       |                 |         |
| Injectables                                    |                       |          |         | Ref.                  |                 |         |
| Implants                                       |                       |          |         | 1.09 ( 0.44 - 2.67 )  |                 | 0.853   |
| IUDs                                           |                       |          |         | 1.95 ( 0.55 - 6.93 )  |                 | 0.304   |
| OCPs                                           |                       |          |         | 1.51 ( 0.27 - 8.57 )  |                 | 0.642   |
| Female sterilization                           |                       |          |         |                       | Perfect success |         |
| <b>4) Other psychosocial characteristics</b>   |                       |          |         |                       |                 |         |
| <b>HIV-related knowledge (HIV-KQ-18)</b>       |                       |          |         |                       |                 |         |
|                                                |                       |          |         | 1.02 ( 0.87 - 1.18 )  |                 | 0.834   |
| <b>Condom use self-efficacy scale</b>          |                       |          |         |                       |                 |         |
|                                                |                       |          |         | 1.02 ( 0.97 - 1.07 )  |                 | 0.549   |
| <b>Sexual Relationship Power Scale</b>         |                       |          |         |                       |                 |         |
| Low                                            |                       |          |         | Ref.                  |                 |         |
| Medium                                         |                       |          |         | 0.93 ( 0.36 - 2.43 )  |                 | 0.885   |
| High                                           |                       |          |         | 0.56 ( 0.18 - 1.71 )  |                 | 0.310   |

OR: odds ratio; AOR: adjusted odds ratio; SD: standard deviation; IUD: intrauterine device; OCP: oral contraceptive pill

a. Adjusted for cluster effect, individuals, age, education, religion, wealth index, number of children, pregnancy intention, partner's pregnancy intention, history of unintended pregnancy, multiple sex partnership, non-barrier modern contraceptive methods, HIV status, partner's HIV status, HIV/STI risk perception, HIV-related knowledge, condom use self-efficacy, and sexual relationship control power.

**Table S10.** Effects of intervention on consistent dual-method contraceptive use among women at 8 months after enrollement

| Variables                                      | Model 1               |          |         | Model 2                |          |                 |
|------------------------------------------------|-----------------------|----------|---------|------------------------|----------|-----------------|
|                                                | OR                    | (95% CI) | p-value | AOR <sup>a</sup>       | (95% CI) | p-value         |
| <b>Intervention</b>                            |                       |          |         |                        |          |                 |
| Control                                        | Ref.                  |          |         | Ref.                   |          |                 |
| Intervention                                   | 9.43 ( 3.70 - 24.06 ) |          | <0.001  | 10.72 ( 2.03 - 56.64 ) |          | 0.005           |
| <b>1) Socio-demographic characteristics</b>    |                       |          |         |                        |          |                 |
| <b>Age in years</b>                            |                       |          |         | 1.05 ( 0.96 - 1.14 )   |          | 0.270           |
| <b>Education</b>                               |                       |          |         |                        |          |                 |
| Never                                          |                       |          |         | Ref.                   |          |                 |
| Primary and more                               |                       |          |         | 0.90 ( 0.40 - 2.00 )   |          | 0.788           |
| <b>Religion</b>                                |                       |          |         |                        |          |                 |
| Christian                                      |                       |          |         | Ref.                   |          |                 |
| Muslim                                         |                       |          |         | 1.15 ( 0.31 - 4.29 )   |          | 0.832           |
| <b>Wealth index</b>                            |                       |          |         |                        |          |                 |
| Poor                                           |                       |          |         | Ref.                   |          |                 |
| Middle                                         |                       |          |         | 1.46 ( 0.63 - 3.38 )   |          | 0.373           |
| Rich                                           |                       |          |         | 1.52 ( 0.61 - 3.80 )   |          | 0.373           |
| <b>No. of children</b>                         |                       |          |         | 0.89 ( 0.65 - 1.22 )   |          | 0.463           |
| <b>Pregnancy intention</b>                     |                       |          |         |                        |          |                 |
| No                                             |                       |          |         | Ref.                   |          |                 |
| Yes                                            |                       |          |         | 0.40 ( 0.12 - 1.34 )   |          | 0.137           |
| Don't know                                     |                       |          |         | 0.93 ( 0.22 - 3.98 )   |          | 0.923           |
| <b>Partner's pregnancy intention</b>           |                       |          |         |                        |          |                 |
| No                                             |                       |          |         | Ref.                   |          |                 |
| Yes                                            |                       |          |         | 1.80 ( 0.47 - 6.86 )   |          | 0.390           |
| Don't know                                     |                       |          |         | 1.34 ( 0.34 - 5.24 )   |          | 0.674           |
| <b>History of unintended pregnancy</b>         |                       |          |         |                        |          |                 |
| No                                             |                       |          |         | Ref.                   |          |                 |
| Yes                                            |                       |          |         | 0.86 ( 0.40 - 1.83 )   |          | 0.688           |
| <b>Multiple sex partners</b>                   |                       |          |         |                        |          |                 |
| No                                             |                       |          |         | Ref.                   |          |                 |
| Yes                                            |                       |          |         | 0.94 ( 0.17 - 5.16 )   |          | 0.942           |
| <b>2) HIV-related characteristics</b>          |                       |          |         |                        |          |                 |
| <b>HIV status</b>                              |                       |          |         |                        |          |                 |
| Negative                                       |                       |          |         | Ref.                   |          |                 |
| Positive                                       |                       |          |         | 1.16 ( 0.20 - 6.63 )   |          | 0.868           |
| <b>Partner's HIV status</b>                    |                       |          |         |                        |          |                 |
| Negative                                       |                       |          |         | Ref.                   |          |                 |
| Positive                                       |                       |          |         | 1.12 ( 0.18 - 7.00 )   |          | 0.905           |
| Don't know                                     |                       |          |         | 0.41 ( 0.12 - 1.36 )   |          | 0.146           |
| <b>HIV/STI risk perception</b>                 |                       |          |         |                        |          |                 |
| No risk at all                                 |                       |          |         | Ref.                   |          |                 |
| Small                                          |                       |          |         | 0.85 ( 0.27 - 2.70 )   |          | 0.782           |
| Moderate                                       |                       |          |         | 0.96 ( 0.29 - 3.16 )   |          | 0.944           |
| Great                                          |                       |          |         | 1.20 ( 0.33 - 4.34 )   |          | 0.785           |
| <b>3) Non-barrier modern contraceptive use</b> |                       |          |         |                        |          |                 |
| <b>Methods in use</b>                          |                       |          |         |                        |          |                 |
| Injectables                                    |                       |          |         | Ref.                   |          |                 |
| Implants                                       |                       |          |         | 0.85 ( 0.38 - 1.89 )   |          | 0.685           |
| IUDs                                           |                       |          |         | 2.55 ( 0.87 - 7.46 )   |          | 0.087           |
| OCPs                                           |                       |          |         | 0.60 ( 0.11 - 3.37 )   |          | 0.566           |
| Female sterilization                           |                       |          |         |                        |          | Perfect success |
| <b>4) Other psychosocial characteristics</b>   |                       |          |         |                        |          |                 |
| <b>HIV-related knowledge (HIV-KQ-18)</b>       |                       |          |         | 1.02 ( 0.89 - 1.16 )   |          | 0.779           |
| <b>Condom use self-efficacy scale</b>          |                       |          |         | 1.00 ( 0.96 - 1.05 )   |          | 0.858           |
| <b>Sexual Relationship Power Scale</b>         |                       |          |         |                        |          |                 |
| Low                                            |                       |          |         | Ref.                   |          |                 |
| Medium                                         |                       |          |         | 0.90 ( 0.37 - 2.16 )   |          | 0.806           |
| High                                           |                       |          |         | 1.11 ( 0.44 - 2.83 )   |          | 0.829           |

OR: odds ratio; AOR: adjusted odds ratio; SD: standard deviation; IUD: intrauterine device; OCP: oral contraceptive pill

a. Adjusted for cluster effect, individuals, age, education, religion, wealth index, number of children, pregnancy intention, partner's pregnancy intention, history of unintended pregnancy, multiple sex partnership, non-barrier modern contraceptive methods, HIV status, partner's HIV status, HIV/STI risk perception, HIV-related knowledge, condom use self-efficacy, and sexual relationship control power.
